# Supplementary material for: More filtering on SNP calling does not remove evidence of inter-nucleus recombination in dikaryotic arbuscular mycorrhizal fungi
Source: bioRxiv preprint, doi:10.1101/2020.01.15.906412, version 1 (2020-01-15)
Supplement: Supplemental Table 1 [file 906412_file06.xlsx]

## Sheet: SL1
scaffold	reference	position	SN06	SN07	SN14	SN15	SN05	SN12	SN17	SN23	SN04	SN08	SN10	SN16	SN18	SN21	SN25	MAT_A	MAT_B
scaffold_3	A	7443				T												T	--
scaffold_4	G	20173			A													A	--
scaffold_4	C	27051			T													T	--
scaffold_4	G	27709			A													A	--
scaffold_4	C	48062			T													T	--
scaffold_4	A	48144		A	G													G	A
scaffold_4	T	48569			T													T	--
scaffold_4	T	48613			T													T	--
scaffold_4	T	50165			T													T	--
scaffold_4	G	50206			G													G	--
scaffold_4	T	52395			T													T	--
scaffold_4	G	52904			A													A	--
scaffold_4	C	58594			C													C	--
scaffold_4	G	62584			A													A	--
scaffold_4	A	78538	T															T	--
scaffold_4	A	79735	G		G						A							G	A
scaffold_4	T	79992	A															A	--
scaffold_4	A	80195	G		G													G	--
scaffold_4	A	80299	T		T													T	--
scaffold_4	G	81306	A		A													A	--
scaffold_4	C	113420						T										--	T
scaffold_4	T	142497										C						--	C
scaffold_4	A	190322										T						--	T
scaffold_4	T	194782										T						--	T
scaffold_4	T	214434										C						--	C
scaffold_4	A	214981										T						--	T
scaffold_4	T	227763												C				C	--
scaffold_4	G	233374		G														--	G
scaffold_4	A	241881					G											--	G
scaffold_4	G	247962		A			A			A								--	A
scaffold_4	A	254842					T			T								--	T
scaffold_4	T	255634					C			C								--	C
scaffold_4	T	261356										C						--	C
scaffold_4	T	263054					A					A						--	A
scaffold_4	G	265113					A					A						--	A
scaffold_4	T	269303					C					C						--	C
scaffold_4	T	269354					C					C						--	C
scaffold_4	A	269368					G					G						--	G
scaffold_6	A	6947				G												G	--
scaffold_6	T	7949				A												A	--
scaffold_6	A	8125			T	T												T	--
scaffold_6	A	12063				G												G	--
scaffold_6	C	13376				T												T	--
scaffold_6	A	13500				G												G	--
scaffold_6	A	16313				G												G	--
scaffold_6	C	17820				T												T	--
scaffold_6	C	19553				T												T	--
scaffold_6	T	19699				A												A	--
scaffold_6	A	19789				G												G	--
scaffold_6	T	21677				G												G	--
scaffold_6	T	35938						C										--	C
scaffold_6	G	38963						A		A								--	A
scaffold_6	G	41007								A								--	A
scaffold_6	A	45635								G								--	G
scaffold_6	A	59416								A								--	A
scaffold_6	G	61136								A				A				--	A
scaffold_6	A	61155												G				--	G
scaffold_6	G	61706								A								--	A
scaffold_6	T	61718								A								--	A
scaffold_6	G	62322								A								--	A
scaffold_6	G	111269			G													G	--
scaffold_6	G	111276			G													G	--
scaffold_6	C	111670			T													T	--
scaffold_6	A	111684			G													G	--
scaffold_6	T	111700			C													C	--
scaffold_6	G	111735			A													A	--
scaffold_6	T	111855			A													A	--
scaffold_6	A	111860			G													G	--
scaffold_6	C	111899			T													T	--
scaffold_6	C	120265			T													T	--
scaffold_6	C	125965			T													T	--
scaffold_6	A	125997			T													T	--
scaffold_6	G	128538				A				A						G	A	G	A
scaffold_6	T	128577				A				A							A	--	A
scaffold_6	T	128912			G	T			T	T						G	T	G	T
scaffold_6	G	128937			A	G			G	G						A	G	A	G
scaffold_6	T	128946			C	T			T	T						C	T	C	T
scaffold_6	A	133638				T										A	T	A	T
scaffold_7	T	150374								T								--	T
scaffold_8	T	122199											T					--	T
scaffold_8	T	143323												C				C	--
scaffold_8	T	202616						T										--	T
scaffold_8	T	203217														C		C	--
scaffold_10	T	125739				A												A	--
scaffold_14	A	165157									T			A				A	T
scaffold_15	A	9590				A												A	--
scaffold_15	A	17854				A												A	--
scaffold_15	A	18001				A	G											A	G
scaffold_15	C	19580				C												C	--
scaffold_15	A	79992				G												G	--
scaffold_15	A	87963						T										--	T
scaffold_15	G	89096						G										--	G
scaffold_15	A	90333				G		A						G				G	A
scaffold_15	C	90904				C		T						C				C	T
scaffold_15	T	94364				C			T									C	T
scaffold_15	C	95586				C			T									C	T
scaffold_15	A	95613				A			G					A				A	G
scaffold_15	A	95766				A				G								A	G
scaffold_15	A	96036				C			A	A				C				C	A
scaffold_15	G	96064				A			G	G								A	G
scaffold_15	T	96130				A			T	T				A				A	T
scaffold_15	A	96151				C			A	A				C				C	A
scaffold_15	A	96241				G								G				G	--
scaffold_15	G	96500				G			T					G				G	T
scaffold_15	A	96557				A			T					A				A	T
scaffold_15	G	96946			A	A			G	G				A				A	G
scaffold_15	G	97030			A	A				G				A				A	G
scaffold_15	C	97635			C	C				T								C	T
scaffold_15	G	97822			G	G				A								G	A
scaffold_15	C	98240			C	C				T								C	T
scaffold_15	G	98334			A	A				G				A				A	G
scaffold_15	A	99038			C	C												C	--
scaffold_15	A	99047			G	G												G	--
scaffold_15	G	99063			A	A												A	--
scaffold_15	C	99661			C	C												C	--
scaffold_15	C	100605			C	C			T									C	T
scaffold_15	C	100711			C	C			T	T								C	T
scaffold_15	C	100985			T	T			C									T	C
scaffold_15	T	101011			A	A			T									A	T
scaffold_15	A	101164			G	G			A			A						G	A
scaffold_15	A	101897			G	G			A			A						G	A
scaffold_15	C	102329			T	T			C			C						T	C
scaffold_15	C	102912			C	C			T									C	T
scaffold_15	G	102997			G	G			A					G				G	A
scaffold_15	C	103079			C	C			T			T						C	T
scaffold_15	T	103189			T	T			C			C						T	C
scaffold_15	A	103472			G	G			A									G	A
scaffold_15	T	106328			T	T			C									T	C
scaffold_15	G	109423	G		G				A									G	A
scaffold_15	G	110218	A		A				G									A	G
scaffold_15	T	111139	C		C				T									C	T
scaffold_15	G	112939	A	G	A				G									A	G
scaffold_15	A	120192			G													G	--
scaffold_15	C	126241			T													T	--
scaffold_15	A	151300	A															A	--
scaffold_15	T	151816	G															G	--
scaffold_15	G	151892	A									G						A	G
scaffold_15	A	154052	G									A						G	A
scaffold_15	A	155858	A	T														A	T
scaffold_15	G	157669	T	G								G						T	G
scaffold_15	A	157740	T	A														T	A
scaffold_15	T	161373	T	A								A						T	A
scaffold_15	A	162857	G	A								A						G	A
scaffold_15	C	167336	T	C								C						T	C
scaffold_15	G	167577	G	A								A						G	A
scaffold_15	A	167608	A	G								G						a	G
scaffold_15	A	175536		A								A		G				G	A
scaffold_15	A	176056		A								A		T				T	A
scaffold_15	G	187911	G				A					A		G				G	A
scaffold_15	G	188914	A				G					G		A				A	G
scaffold_15	C	188962	C				T					T		C				C	T
scaffold_15	T	189140	T				C					C						T	C
scaffold_15	A	189569	G									A		G				G	A
scaffold_15	T	189581	C				T					T		C				C	T
scaffold_15	T	189655	C				T					T		C				C	T
scaffold_15	G	190346	A									G						A	G
scaffold_15	C	196510	C															C	--
scaffold_15	A	198696										T						--	T
scaffold_15	C	199140										T						--	T
scaffold_15	A	204269				G												G	--
scaffold_15	T	204387				A												A	--
scaffold_15	C	205081				T												T	--
scaffold_15	G	217106															G	G	--
scaffold_15	T	217370															T	T	--
scaffold_15	T	217391															T	T	--
scaffold_16	G	167323			G			A			G	G						G	A
scaffold_16	T	173750						C										--	C
scaffold_16	A	173841						G										--	G
scaffold_17	A	16448			T													T	--
scaffold_17	G	16536			T													T	--
scaffold_17	T	22157			A													A	--
scaffold_17	T	22392			C													C	--
scaffold_17	C	22685			T													T	--
scaffold_17	A	28491		A	G					A								G	A
scaffold_17	A	30537		A						A								--	A
scaffold_17	T	30722		T						T								--	T
scaffold_17	C	38782		T						T								--	T
scaffold_17	C	38963		A						A								--	A
scaffold_17	G	41996		T						T								--	T
scaffold_17	C	65892			A													A	--
scaffold_17	A	67675			G													G	--
scaffold_17	A	78323			A													A	--
scaffold_17	G	78530			T													T	--
scaffold_17	G	81458			A													A	--
scaffold_17	G	83125			A													A	--
scaffold_17	T	127594		A														--	A
scaffold_17	A	131865		G														--	G
scaffold_17	T	135653		C						C								--	C
scaffold_17	C	156409	T									C						T	C
scaffold_17	T	156464	T									A						T	A
scaffold_17	A	159199	A									G						A	G
scaffold_18	C	4681												T				T	--
scaffold_19	T	98973						T										--	T
scaffold_19	C	99050						C										--	C
scaffold_19	T	144791			C													C	--
scaffold_19	C	144900			C													C	--
scaffold_19	C	144956			C													C	--
scaffold_19	G	145084			G													G	--
scaffold_19	G	148017			A													A	--
scaffold_19	A	148523			G													G	--
scaffold_19	T	150250			T													T	--
scaffold_19	G	170155					A	A							G			G	A
scaffold_19	G	183554													A			A	--
scaffold_19	G	183567													A			A	--
scaffold_23	A	51602			T													T	--
scaffold_23	T	53791			A													A	--
scaffold_23	A	54003			T													T	--
scaffold_23	C	54176			T													T	--
scaffold_23	T	54262			C													C	--
scaffold_23	C	55071			T													T	--
scaffold_23	C	55450			C													C	--
scaffold_23	G	57105			A													A	--
scaffold_23	A	57152			G					A								G	A
scaffold_23	A	60063			A					C								A	C
scaffold_23	G	62928			A													A	--
scaffold_23	T	64564			A					T								A	T
scaffold_23	G	67611			C					G								C	G
scaffold_23	A	69829			A					G								A	G
scaffold_23	C	70257			C					T								C	T
scaffold_23	T	70518			A					T								A	T
scaffold_23	T	71146			C					T								C	T
scaffold_23	A	71189			G					A								G	A
scaffold_23	T	71247			C					T								C	T
scaffold_23	A	71385			T					A								T	A
scaffold_23	G	72168			G					A								G	A
scaffold_23	C	72198			C					T								C	T
scaffold_23	T	72406			T					C								T	C
scaffold_23	A	73550										G						--	G
scaffold_23	T	73605										G						--	G
scaffold_23	C	73631												C				C	--
scaffold_23	T	74638			T							G						T	G
scaffold_23	G	74745								G		G						--	G
scaffold_23	C	163930					T							C				C	T
scaffold_23	T	164110					C							T				T	C
scaffold_23	T	165087								G				T				T	G
scaffold_23	G	165517				T	G			G				T				T	G
scaffold_23	A	166386				T	A							T				T	A
scaffold_23	A	166878				A	T			T				A				A	T
scaffold_23	A	167019				G	A			A				G				G	A
scaffold_23	C	167160				A	C			C				A				A	C
scaffold_23	A	167244				T	A			A				T				T	A
scaffold_23	A	167298					A			A				G				G	A
scaffold_23	C	170609				C	A			A				C				C	A
scaffold_23	T	170640				T	C			C				T				T	C
scaffold_23	A	170698				A	T			T				A				A	T
scaffold_23	T	170728				T	A							T				T	A
scaffold_23	G	170789				G	A			A				G				G	A
scaffold_23	C	170872				C	T			T				C				C	T
scaffold_23	G	174880					T			T				G				G	T
scaffold_23	G	175005				G	T			T				G				G	T
scaffold_23	A	175137				A	G			G				A				A	G
scaffold_23	G	175914					A			A				G				G	A
scaffold_23	T	176908					A			A								--	A
scaffold_23	A	177875					G			G								--	G
scaffold_26	A	636			A									A				A	--
scaffold_26	T	718			C								T	C				C	T
scaffold_26	C	875			T								C	T				T	C
scaffold_26	C	1437			T								C	T				T	C
scaffold_26	T	2064			T								C	T				T	C
scaffold_26	C	2215			C								T	C				C	T
scaffold_26	A	4576			A								G	A				A	G
scaffold_26	G	6202	A		A									A				A	--
scaffold_26	T	6318	C		C								T	C				C	T
scaffold_26	A	8280	G		G								A					G	A
scaffold_26	C	8343	T		T													T	--
scaffold_26	T	8468	G		G								T					G	T
scaffold_26	C	8680	C		C								T					C	T
scaffold_26	A	8783	A		A													A	--
scaffold_26	G	8791	G		G													G	--
scaffold_26	T	16560			C													C	--
scaffold_26	A	16608			G													G	--
scaffold_26	T	17098			C					T								C	T
scaffold_26	A	17724			A					G								A	G
scaffold_26	T	17750			T													T	--
scaffold_26	T	17757			T		C			C								T	C
scaffold_26	C	17790			C		T											C	T
scaffold_26	G	17798			G		A											G	A
scaffold_26	G	17889			G					A								G	A
scaffold_26	A	17996			A		T											A	T
scaffold_26	A	19548			T		A											T	A
scaffold_26	T	19823			T		C											T	C
scaffold_26	G	22253			G		A			A								G	A
scaffold_26	G	22327			G		A			A								G	A
scaffold_26	A	22667			A		T											A	T
scaffold_26	A	22945			G		A											G	A
scaffold_26	T	22974			G		T											G	T
scaffold_26	C	29142					C											--	C
scaffold_26	T	55233	A															A	--
scaffold_26	T	65705			A													A	--
scaffold_26	G	67604			A													A	--
scaffold_26	A	91737			T													T	--
scaffold_26	C	94712			T			C	C	C								T	C
scaffold_26	A	97236			A			G	G									A	G
scaffold_26	T	109791	T		T			C										T	C
scaffold_26	A	110526	A					G										A	G
scaffold_26	A	110617	A					G										A	G
scaffold_26	A	110767	G					A										G	A
scaffold_26	T	139175														C		C	--
scaffold_27	A	3867								A								--	A
scaffold_27	C	8120						C		C								--	C
scaffold_27	C	8126						T		T								--	T
scaffold_27	A	9011						A		A								--	A
scaffold_27	T	9102						T		T								--	T
scaffold_27	C	9266						C		C								--	C
scaffold_27	C	9338						C		C								--	C
scaffold_27	T	13409						C										--	C
scaffold_27	G	13467						A										--	A
scaffold_27	A	14370						G										--	G
scaffold_27	A	14406						G										--	G
scaffold_27	T	30587			C													C	--
scaffold_27	T	35363			A													A	--
scaffold_27	G	38612			A													A	--
scaffold_27	C	42347			A													A	--
scaffold_27	C	49453										T						--	T
scaffold_27	G	49849										A						--	A
scaffold_27	T	50081					G					G						--	G
scaffold_27	G	50435										A						--	A
scaffold_27	T	51995										C						--	C
scaffold_27	T	53163										A						--	A
scaffold_27	A	53499										G						--	G
scaffold_27	G	54018										G						--	G
scaffold_27	G	58343								T								--	T
scaffold_27	C	63607							T	T		T						--	T
scaffold_27	A	81368								G								--	G
scaffold_27	A	116118	A														A	A	--
scaffold_27	C	120511	C						T							C	C	C	T
scaffold_27	C	120529	C						A							C	C	C	A
scaffold_27	G	120545	G						A							G	G	G	A
scaffold_27	A	120554															A	A	--
scaffold_27	A	120651															A	A	--
scaffold_27	C	143833										T						--	T
scaffold_27	G	165776														T		T	--
scaffold_28	G	86496			G	G				G	A	A				G		G	A
scaffold_28	G	90024			G					G	A	A						G	A
scaffold_28	C	107851										C						--	C
scaffold_30	G	14939			A													A	--
scaffold_30	C	19156			C													C	--
scaffold_30	A	19163			A													A	--
scaffold_30	G	19704			A							G						A	G
scaffold_30	C	23111			T													T	--
scaffold_30	C	23378			T													T	--
scaffold_30	G	23597			G													G	--
scaffold_30	G	25146			G													G	--
scaffold_30	G	25173			G													G	--
scaffold_30	A	25464			G													G	--
scaffold_30	T	25546			C													C	--
scaffold_30	T	25555			A													A	--
scaffold_30	T	25701			C													C	--
scaffold_30	T	25708			C													C	--
scaffold_30	C	25953			C													C	--
scaffold_30	G	29824			T													T	--
scaffold_30	A	30412			G													G	--
scaffold_30	C	30429			T													T	--
scaffold_31	G	11651							A									--	A
scaffold_31	C	11819							T									--	T
scaffold_31	G	27531						G	G							A		A	G
scaffold_31	T	35927						C										--	C
scaffold_31	C	36363						C										--	C
scaffold_31	T	61779	T															T	--
scaffold_31	G	77672	A															A	--
scaffold_31	T	83069	T															T	--
scaffold_31	G	97381	A															A	--
scaffold_31	A	98575	G															G	--
scaffold_31	T	99747	C															C	--
scaffold_31	T	101131	C						T									C	T
scaffold_31	A	101837							A									--	A
scaffold_31	T	101845							T									--	T
scaffold_31	A	107554	A						T									A	T
scaffold_31	T	109982	C						T									C	T
scaffold_31	C	110032	T						C									T	C
scaffold_31	G	111556	A						G									A	G
scaffold_31	T	112069	C						T									C	T
scaffold_31	A	114726	A															A	--
scaffold_31	G	114765	G															G	--
scaffold_31	A	114909	A						T									A	T
scaffold_31	T	114935	T						C									T	C
scaffold_31	T	115044	T						C									T	C
scaffold_31	G	115311	G															G	--
scaffold_31	G	117377	A															A	--
scaffold_31	C	117689	T															T	--
scaffold_31	C	119230	T															T	--
scaffold_31	A	119543	T															T	--
scaffold_31	A	119959	G															G	--
scaffold_32	G	41903										A						--	A
scaffold_32	G	42146						T				T	T					--	T
scaffold_32	A	42351								G		G						--	G
scaffold_33	A	112464										A		T				T	A
scaffold_33	A	114326										T		A				A	T
scaffold_33	A	115686										A		G				G	A
scaffold_33	C	115695										C		T				T	C
scaffold_33	A	123177										G		A				A	G
scaffold_33	A	124644										G		A				A	G
scaffold_33	C	126892										A		C			C	C	A
scaffold_33	A	127503										G		A				A	G
scaffold_33	A	127537										T		A				A	T
scaffold_33	G	135918										A						--	A
scaffold_33	T	142518										G						--	G
scaffold_33	C	158150										T						--	T
scaffold_33	G	163282										T						--	T
scaffold_34	C	3386								T				T				--	T
scaffold_34	G	102030													A			A	--
scaffold_34	C	102101													G			G	--
scaffold_34	A	102436													G			G	--
scaffold_34	G	102479													A			A	--
scaffold_34	T	102489													C			C	--
scaffold_34	G	102512													A			A	--
scaffold_34	G	102644													A			A	--
scaffold_35	A	1784				A												A	--
scaffold_35	T	15742				A		T										A	T
scaffold_35	C	41917						T						T				--	T
scaffold_38	C	6440				T								T				T	--
scaffold_38	T	6538												A				A	--
scaffold_38	T	36219						C										--	C
scaffold_38	G	36253						A										--	A
scaffold_38	T	37670						A										--	A
scaffold_38	C	37687						T										--	T
scaffold_38	A	37713						T										--	T
scaffold_38	G	37811						A										--	A
scaffold_38	A	37839						G										--	G
scaffold_38	G	45880						T										--	T
scaffold_38	A	64395												T				T	--
scaffold_38	G	64920												A				A	--
scaffold_38	A	64946												T				T	--
scaffold_38	A	65225												C				C	--
scaffold_38	T	72721												C				C	--
scaffold_38	T	86037				T												T	--
scaffold_38	C	86227				T												T	--
scaffold_38	T	86411				T												T	--
scaffold_38	G	86535				A												A	--
scaffold_38	A	86549				T												T	--
scaffold_38	T	87272				C												C	--
scaffold_38	A	87342				A												A	--
scaffold_38	A	87946				A												A	--
scaffold_38	A	92680				T												T	--
scaffold_38	C	131067				C												C	--
scaffold_38	T	131433		C		T												T	C
scaffold_38	A	131674		G		A							G					A	G
scaffold_38	A	131821		A		G												G	A
scaffold_40	T	103217		T	A	T		T						A				A	T
scaffold_40	C	154770		C			C			C	T							T	C
scaffold_42	G	140014			A													A	--
scaffold_42	T	140576			C													C	--
scaffold_42	T	140615			A													A	--
scaffold_42	T	140969	G		G													G	--
scaffold_42	G	165119				A												A	--
scaffold_42	A	165148				C												C	--
scaffold_42	C	165407				T												T	--
scaffold_42	A	165422				T												T	--
scaffold_42	C	165656				T												T	--
scaffold_42	A	165685				T												T	--
scaffold_42	A	165714				G												G	--
scaffold_42	T	165822				C												C	--
scaffold_42	C	173947				T										T		T	--
scaffold_47	T	30275		T								T		C				T	C
scaffold_47	A	30431		A		A						A		G				A	G
scaffold_47	G	30477		G		G						G		A				G	A
scaffold_47	T	30634		T		T								C				T	C
scaffold_47	G	30655		G		G						G		A				G	A
scaffold_47	A	30860		A		A								T				A	T
scaffold_47	A	31079		A										G				A	G
scaffold_47	G	31111		G										A				G	A
scaffold_47	A	31443		A		A		A						G				A	G
scaffold_47	A	31487		A		A		A						T				A	T
scaffold_47	A	31563		A								A		G				A	G
scaffold_47	A	31768		A		A								G				A	G
scaffold_47	A	31858		A		A						A		C				A	C
scaffold_47	T	31948		T		T								C				T	C
scaffold_47	G	31960		G		G								A				G	A
scaffold_48	G	1488							A									--	A
scaffold_48	T	65833		C	T							C						T	C
scaffold_49	A	8571						T										--	T
scaffold_49	C	8904						T										--	T
scaffold_49	A	14796		G				G										--	G
scaffold_49	G	14812		A				A										--	A
scaffold_49	T	14943		C				C										--	C
scaffold_49	A	15858		A	G			A										G	A
scaffold_49	A	16121		A	T			A										T	A
scaffold_49	A	17623		A	G			A										G	A
scaffold_49	T	20971		C	T			C										T	C
scaffold_49	T	27288		A				A										--	A
scaffold_49	T	31338		C														C	--
scaffold_51	C	120223												T				T	--
scaffold_51	A	120239												C				C	--
scaffold_51	A	120287												T				T	--
scaffold_51	T	120396												C				C	--
scaffold_51	A	120403												G				G	--
scaffold_51	A	120437												G				G	--
scaffold_51	A	124454												G				G	--
scaffold_51	A	124470												C				C	--
scaffold_51	C	124485												T				T	--
scaffold_51	C	124563												A				A	--
scaffold_51	T	127862												C				C	--
scaffold_51	G	127874												A				A	--
scaffold_51	T	127896												A				A	--
scaffold_51	A	127904												G				G	--
scaffold_51	C	127919												A				A	--
scaffold_51	C	150340				T				C								T	C
scaffold_51	A	158875		G		A												A	G
scaffold_52	A	8345							T			T						--	T
scaffold_55	T	74882			A													A	--
scaffold_60	T	79269												C				C	--
scaffold_61	C	731			T			C									T	T	C
scaffold_61	A	1295			T			A										T	A
scaffold_61	G	1475			T			G									T	T	G
scaffold_61	T	1822			C			T										C	T
scaffold_61	A	1947			A			T										A	T
scaffold_61	T	1983			C													C	--
scaffold_61	A	2041			G			A										G	A
scaffold_61	T	2048			A			T										A	T
scaffold_61	A	2060			G			A										G	A
scaffold_61	G	21359												T				T	--
scaffold_61	A	21432			G									G				G	--
scaffold_61	A	21438			G									G				G	--
scaffold_61	C	21483			T									T				T	--
scaffold_61	A	21599												T				T	--
scaffold_61	C	21628												T				T	--
scaffold_61	T	40414			A													A	--
scaffold_61	A	40453			G													G	--
scaffold_61	C	41976			T			C				C						T	C
scaffold_61	A	42216			T													T	--
scaffold_61	T	48108					C					C						--	C
scaffold_61	C	48531					T											--	T
scaffold_61	C	54072					T			T			T					--	T
scaffold_61	C	58436					T			T								--	T
scaffold_61	A	58538					G			G								--	G
scaffold_61	T	61886					C			C								--	C
scaffold_61	C	61967					T			T								--	T
scaffold_61	T	62029					C			C			C					--	C
scaffold_61	C	62450					T			T		T						--	T
scaffold_61	T	62495					C			C								--	C
scaffold_61	A	63727					C			C		C	C					--	C
scaffold_61	G	64205					A			A		A						--	A
scaffold_61	A	66076					G											--	G
scaffold_61	T	66263					C											--	C
scaffold_61	T	68621			C	C	T	T										C	T
scaffold_61	T	70808				T	G	G				G						T	G
scaffold_61	G	71210				T	G	G										T	G
scaffold_61	G	71458				G	A	A										G	A
scaffold_61	A	73599				G	A											G	A
scaffold_61	T	73808					T											--	T
scaffold_61	C	74362					C			C								--	C
scaffold_61	G	74590				A	G			G								A	G
scaffold_61	G	74698					G	G		G								--	G
scaffold_61	G	74708					G	G		G								--	G
scaffold_61	A	74936				G	A	A		A								G	A
scaffold_61	C	74986					C	C		C								--	C
scaffold_61	T	75023				C	T	T		T								C	T
scaffold_61	A	83518					A			A								--	A
scaffold_61	G	86033			G		A	A		A				G				G	A
scaffold_61	T	87731			C		T			T								C	T
scaffold_61	A	88593			G		A			A								G	A
scaffold_61	C	89008			C		T			T								C	T
scaffold_61	T	89251			C		T			T								C	T
scaffold_61	T	89270			C		T			T								C	T
scaffold_61	T	90134			C		T			T								C	T
scaffold_61	C	91024			C		T			T								C	T
scaffold_61	A	95267			T		A			A								T	A
scaffold_61	A	96614	C		C		A										C	C	A
scaffold_61	C	96909			C		G			G				C			C	C	G
scaffold_61	A	97155			A		G			G							A	A	G
scaffold_61	G	97847			G		A			A							G	G	A
scaffold_61	A	98141			G		A			A							G	G	A
scaffold_61	T	105554			C													C	--
scaffold_61	G	106261			A													A	--
scaffold_61	C	130775				C	T											C	T
scaffold_61	G	131320					G											--	G
scaffold_61	C	131802					T											--	T
scaffold_61	C	137642					C											--	C
scaffold_61	A	138116					T											--	T
scaffold_62	A	1256								G								--	G
scaffold_62	T	8050					T			T								--	T
scaffold_62	A	8101								G								--	G
scaffold_62	A	11517								A								--	A
scaffold_62	C	15141					T			T		T						--	T
scaffold_62	A	15789					A			A		A						--	A
scaffold_62	A	15851					G			G		G						--	G
scaffold_62	A	16433					G			G		G						--	G
scaffold_62	G	19628								A		A						--	A
scaffold_62	A	23894								G		G						--	G
scaffold_62	T	34625										A						--	A
scaffold_62	T	34924										A						--	A
scaffold_62	A	42152										G						--	G
scaffold_62	C	42267										T						--	T
scaffold_62	T	42314										C						--	C
scaffold_62	A	43079								G		G						--	G
scaffold_62	T	56558								C	C							--	C
scaffold_62	A	56805			G					A	A	A						G	A
scaffold_62	C	56821			T					C	C	C						T	C
scaffold_62	A	57821								A	A	A						--	A
scaffold_62	T	57836								T	T	T						--	T
scaffold_62	A	66801								T	T							--	T
scaffold_62	G	73643		A						A								--	A
scaffold_62	C	73697		T						T								--	T
scaffold_62	G	75889		A		G												G	A
scaffold_62	A	75989		G		A												A	G
scaffold_62	T	76022		A		T												T	A
scaffold_62	T	76842		T		C												C	T
scaffold_62	A	76954		A														A	A
scaffold_62	A	77553				A			T									A	T
scaffold_62	G	80816				G			A									G	A
scaffold_62	A	80893				A			G									A	G
scaffold_62	A	81023							T									--	T
scaffold_62	G	81317							A									--	A
scaffold_62	G	81484				G												G	--
scaffold_62	G	82152				A												A	--
scaffold_62	C	85158				A												A	--
scaffold_62	A	86002				T												T	--
scaffold_62	C	86359				T		C										T	C
scaffold_62	C	89935				T		C										T	C
scaffold_62	C	92010				G												G	--
scaffold_62	T	97272	A			A												A	--
scaffold_62	T	104953	C															C	--
scaffold_62	C	112326			T													T	--
scaffold_62	T	114495					G											--	G
scaffold_62	C	126626					T											--	T
scaffold_62	T	132747							T	T								--	T
scaffold_62	G	133549							G	G								--	G
scaffold_62	C	137543		A														A	A
scaffold_62	C	137635		T	C													C	T
scaffold_62	A	137697		G						G								--	G
scaffold_62	A	138256		A														A	A
scaffold_62	T	138355		T						T								--	T
scaffold_65	T	37555					A											--	A
scaffold_65	A	38592					T											--	T
scaffold_66	T	1293		C					C									--	C
scaffold_66	C	1332		T					T									--	T
scaffold_66	A	1678		G					G									--	G
scaffold_66	C	5465		T					T			T				C		C	T
scaffold_69	A	17008													A			A	--
scaffold_69	T	17049													C			C	--
scaffold_69	G	17098													A			A	--
scaffold_69	G	17122													A			A	--
scaffold_69	A	17146													G			G	--
scaffold_69	C	17280													T			T	--
scaffold_69	T	28600										C			T			T	C
scaffold_69	G	28619										A			G			G	A
scaffold_69	T	29110										C			T			T	C
scaffold_69	T	29359										C			T			T	C
scaffold_69	G	29365										A			G			G	A
scaffold_69	G	29417										A			G			G	A
scaffold_69	C	33795										A						--	A
scaffold_69	G	33927										A						--	A
scaffold_69	C	53982			T					C		C						T	C
scaffold_69	A	54102								A		A						G	A
scaffold_69	T	54241			C					T		T						C	T
scaffold_69	T	54665			T					A		A						T	A
scaffold_69	T	54729			T					G								T	G
scaffold_69	T	56736			C					T		T						C	T
scaffold_69	G	57033			G					A		A						G	A
scaffold_69	G	57250			A					G		G						A	G
scaffold_69	A	58731			A					G		G						A	G
scaffold_69	T	59626			T					C		C						T	C
scaffold_69	A	59672			A					G		G						A	G
scaffold_69	T	60780			C					T		T						C	T
scaffold_69	G	61338			A					G		G						A	G
scaffold_69	T	62047			A					T		T						A	T
scaffold_69	A	63057			G					A		A						G	A
scaffold_69	T	64415			T					A		A						T	A
scaffold_69	T	65102			T					C								T	C
scaffold_69	A	65709			A				G									A	G
scaffold_69	C	69521			C				T							C		C	T
scaffold_69	C	70731			T											T		T	--
scaffold_69	G	70985			C											C		C	--
scaffold_69	T	71045			G											G		G	--
scaffold_69	G	74938			T											T		T	--
scaffold_69	A	75117			T											T		T	--
scaffold_69	T	75268			C											C		C	--
scaffold_69	C	75278			T											T		T	--
scaffold_69	A	75720			T											T		T	--
scaffold_69	C	75742			A											A		A	--
scaffold_69	G	75774			A											A		A	--
scaffold_69	C	75996			T											T		T	--
scaffold_69	A	76124			C											C		C	--
scaffold_69	G	76275			A											A		A	--
scaffold_69	G	78203														A		A	--
scaffold_69	T	102972						T										--	T
scaffold_69	G	102989						G										--	G
scaffold_69	T	103001						T										--	T
scaffold_69	A	106933				G												G	--
scaffold_69	A	106999				A												A	--
scaffold_69	A	107497				A												A	--
scaffold_69	C	109182				C												C	--
scaffold_69	T	109385				T												T	--
scaffold_69	T	109716				C												C	--
scaffold_69	T	110534				C												C	--
scaffold_69	T	110934				A												A	--
scaffold_69	G	118746				A		G										A	G
scaffold_69	T	119103				G		T										G	T
scaffold_69	C	119193				T		C										T	C
scaffold_69	G	119280				G		T										G	T
scaffold_69	G	119305				G		A										G	A
scaffold_69	T	119428				T		A										T	A
scaffold_69	C	119572				T		C										T	C
scaffold_69	T	120153						T										--	T
scaffold_69	T	121470						A										--	A
scaffold_69	T	121708						C										--	C
scaffold_71	T	2139			C													C	--
scaffold_72	T	93188							T									--	T
scaffold_72	G	93496							G									--	G
scaffold_72	T	97089							A									--	A
scaffold_72	T	99140							G									--	G
scaffold_72	A	101291		G					G									--	G
scaffold_72	T	101801		A					A									--	A
scaffold_72	T	102405		A					A									--	A
scaffold_75	T	140895		C					T				C					T	C
scaffold_76	C	906					C											--	C
scaffold_76	G	72641		G			A	G										A	G
scaffold_76	G	72942		G			A	G										A	G
scaffold_76	T	79761		C				C										--	C
scaffold_76	A	84382						G										--	G
scaffold_76	A	101526		A	G			A										G	A
scaffold_76	T	103121		G				G										--	G
scaffold_76	G	104666		G				G										--	G
scaffold_76	A	108804			A													A	--
scaffold_76	G	112224			T			G										T	G
scaffold_77	A	10196		T														T	--
scaffold_77	A	10951		T														T	--
scaffold_77	C	10960		T														T	--
scaffold_77	A	11045		G														G	--
scaffold_77	T	11605		C														C	--
scaffold_77	G	11702		C														C	--
scaffold_77	G	12014		A														A	--
scaffold_77	C	12282		T														T	--
scaffold_77	A	12970		T														T	--
scaffold_77	T	13015		C														C	--
scaffold_77	G	13627		A					A									--	A
scaffold_77	T	13705		A					A									--	A
scaffold_77	C	23359		C														C	--
scaffold_77	A	24624		G											A			G	A
scaffold_77	T	25566		T											C			T	C
scaffold_77	A	25685		A											T			A	T
scaffold_77	T	32338		C														C	--
scaffold_79	C	285										T						--	T
scaffold_80	A	59437						G										--	G
scaffold_80	T	80632						C										--	C
scaffold_80	C	82633						T										--	T
scaffold_80	T	100372						C										--	C
scaffold_80	A	113392							G	G								--	G
scaffold_80	A	115845							G									--	G
scaffold_80	A	115874							T	T								--	T
scaffold_80	T	120495								A								--	A
scaffold_80	C	120758								T								--	T
scaffold_80	C	121770				C				T								C	T
scaffold_85	G	72276								G								--	G
scaffold_87	C	443			A									A				A	--
scaffold_87	G	8821												G				G	--
scaffold_87	T	8929												A				A	--
scaffold_87	A	29609					A											--	A
scaffold_87	A	29615					A	A										--	A
scaffold_87	A	30282						G										--	G
scaffold_87	A	30291						G										--	G
scaffold_87	T	30543						A							T			T	A
scaffold_87	C	30706						C							T			T	C
scaffold_87	T	31934						C										--	C
scaffold_87	A	32257						A										--	A
scaffold_87	T	32987		C				C							T			T	C
scaffold_87	A	33131						G										--	G
scaffold_87	T	41651	C	T				T										C	T
scaffold_87	G	42926	A	G				G										A	G
scaffold_87	T	43184	C	T				T		T								C	T
scaffold_87	C	43662	T					C		C								T	C
scaffold_87	C	43740	C	T				T										C	T
scaffold_87	T	44051	C	T				T										C	T
scaffold_87	T	45624	C					T										C	T
scaffold_87	C	45771	T	C				C		C								T	C
scaffold_87	A	45814	G	A				A		A								G	A
scaffold_87	G	46234	A	G				G										A	G
scaffold_87	T	47076	T	C				C										T	C
scaffold_87	C	47910						T										--	T
scaffold_89	C	111072					A	C										A	C
scaffold_91	T	16246		T		C				T	T							C	T
scaffold_91	T	16368		T		C				T	T							C	T
scaffold_91	T	16455		T		C				T	T							C	T
scaffold_91	C	22480				A				C	C							A	C
scaffold_91	A	22548				G				A	A							G	A
scaffold_91	T	22569				C				T	T							C	T
scaffold_94	A	6322						G										--	G
scaffold_94	A	7032	A					G										A	G
scaffold_94	T	8256						C										--	C
scaffold_94	A	8756						A										--	A
scaffold_94	A	9114	G					A										G	A
scaffold_94	C	15287	A					C										A	C
scaffold_94	A	16470	T					A										T	A
scaffold_94	G	18012	T					G										T	G
scaffold_94	T	22760	T		T			C										T	C
scaffold_94	C	23070	T					C										T	C
scaffold_94	T	29002			A													A	--
scaffold_96	T	2452								C		C					T	T	C
scaffold_96	G	9707			A					G	G	G						A	G
scaffold_96	T	13799			T		C				C	C						T	C
scaffold_96	T	15364			C		T	T			T	T						C	T
scaffold_96	G	16737			T		G				G	G						T	G
scaffold_96	C	20713			T				C			C						T	C
scaffold_96	T	21421							A									--	A
scaffold_96	G	21648			G			A	A			A						G	A
scaffold_96	G	21653			G			A	A			A						G	A
scaffold_96	A	21860			A				T			T						A	T
scaffold_96	T	23940			C				T									C	T
scaffold_96	A	24180			A							C						A	C
scaffold_96	T	28768			A				T									A	T
scaffold_96	T	35257			T				C									T	C
scaffold_96	A	35455			A				T									A	T
scaffold_96	A	35630			A				T									A	T
scaffold_96	A	36079			A				G									A	G
scaffold_96	T	36441			T				C									T	C
scaffold_96	A	41911			A				T									A	T
scaffold_96	T	42419			A				T									A	T
scaffold_96	A	42720			A				G									A	G
scaffold_96	T	43441			T													T	--
scaffold_96	A	43880			T				A									T	A
scaffold_96	C	44278			T				C									T	C
scaffold_96	A	44606			G				A									G	A
scaffold_96	T	45854			C				T									C	T
scaffold_96	A	51130			A		G									A		A	G
scaffold_96	T	51233			C		T									C		C	T
scaffold_96	T	51248			C		T									C		C	T
scaffold_96	C	51901			T		C									T		T	C
scaffold_96	C	51973			T		C									T		T	C
scaffold_96	A	52972			G		A									G		G	A
scaffold_96	A	57809			G													G	--
scaffold_96	G	58531			A		G											A	G
scaffold_96	G	58614			G		A											G	A
scaffold_96	A	63575			A		G											A	G
scaffold_96	C	63821			T		C											T	C
scaffold_96	C	65483			T		C											T	C
scaffold_96	T	65607			C		T											C	T
scaffold_96	G	66182			A		G											A	G
scaffold_96	T	66250			T		G											T	G
scaffold_96	G	67107					G											--	G
scaffold_96	G	71084					A											--	A
scaffold_96	T	71546					C											--	C
scaffold_96	T	71573					C											--	C
scaffold_96	G	72509					A											--	A
scaffold_96	T	72601					C											--	C
scaffold_96	T	72848					C											--	C
scaffold_96	T	73705					C											--	C
scaffold_96	A	79589								A		A						--	A
scaffold_96	A	80190					A											--	A
scaffold_96	A	83394					A											--	A
scaffold_96	G	90455										T						--	T
scaffold_96	A	105777								G		G				A	A	A	G
scaffold_96	A	106198								G		G				A	A	A	G
scaffold_96	A	112187								A								--	A
scaffold_96	A	114252								A								--	A
scaffold_96	G	120760		A														A	--
scaffold_96	G	150660					G		A	A		G						G	A
scaffold_96	T	158094				T												T	--
scaffold_96	A	159497		A		G												G	A
scaffold_96	G	159598		G		T												T	G
scaffold_96	A	160632		A		G												G	A
scaffold_96	T	161802		T		A												A	T
scaffold_96	G	165884		G		A												A	G
scaffold_96	A	166022				G												G	--
scaffold_96	T	169832		C														C	--
scaffold_96	T	175037		A														A	--
scaffold_96	G	178501		G														G	--
scaffold_96	A	188307								G								--	G
scaffold_98	G	6475			T				G									T	G
scaffold_98	A	29328				A												A	--
scaffold_98	A	78872		T														T	--
scaffold_98	A	94593						G				G	G					--	G
scaffold_98	A	108427											G					--	G
scaffold_98	C	108505			T								C					T	C
scaffold_98	G	108634											G					--	G
scaffold_98	G	112412											G					--	G
scaffold_99	T	178112										T						--	T
scaffold_99	C	178123										C						--	C
scaffold_99	C	185405			T							C						T	C
scaffold_99	T	185600										C						--	C
scaffold_99	C	193115			T													T	--
scaffold_100	A	18256			T										T			T	--
scaffold_100	G	60374							A									--	A
scaffold_100	G	61605			A				G									A	G
scaffold_100	C	62310			C				T									C	T
scaffold_100	T	63008			T				A									T	A
scaffold_100	C	63535			C				T									C	T
scaffold_100	C	65392			C				T									C	T
scaffold_100	T	73140			A			T	T									A	T
scaffold_100	A	83208			G			A		A						G		G	A
scaffold_100	C	83219						C		C						T		T	C
scaffold_100	T	83306								T						G		G	T
scaffold_100	A	83762			G					A								G	A
scaffold_100	A	83830								A								--	A
scaffold_100	A	88664			A					G				G				A	G
scaffold_100	A	88775								G				G				--	G
scaffold_100	G	88804								A				A				--	A
scaffold_100	G	88862			G													G	--
scaffold_100	C	100665	C						T					T				C	T
scaffold_100	T	100673	T						C	C			C	C				T	C
scaffold_100	T	100776							C	C			C	C				--	C
scaffold_100	A	102784	A						G					G				A	G
scaffold_100	T	102929							A	A				A				--	A
scaffold_100	T	103016	C						T	T				T				C	T
scaffold_100	A	103042	G						A	A				A				G	A
scaffold_100	A	103096	A						G	G				G				A	G
scaffold_100	A	103218							G	G				G				--	G
scaffold_100	G	103338	G						A	A			A	A				G	A
scaffold_100	T	103344	T						C	C			C	C				T	C
scaffold_100	C	104846	T						C	C				C				T	C
scaffold_100	T	104981	C						T	T				T				C	T
scaffold_100	T	107104	C						T	T				T				C	T
scaffold_100	T	107119	C						T	T				T				C	T
scaffold_100	T	107343	C						T	T				T				C	T
scaffold_100	G	107354	A						G	G				G				A	G
scaffold_103	T	563				G				T								G	T
scaffold_103	A	8916				A				G								A	G
scaffold_103	T	13230								A								--	A
scaffold_103	T	15623		G		T	T			T		G						G	T
scaffold_103	A	16534				A				G								A	G
scaffold_103	A	26064				G												G	--
scaffold_103	G	35947					A					A						--	A
scaffold_103	C	56313					T											--	T
scaffold_103	A	71275					T		T									--	T
scaffold_103	A	77146					A		A									--	A
scaffold_103	T	106274														G		G	--
scaffold_103	A	106341														T		T	--
scaffold_103	G	110765						A								G		G	A
scaffold_103	A	110990														A		A	--
scaffold_103	T	111068						A								T		T	A
scaffold_103	T	111253						A								T		T	A
scaffold_103	T	111290						A								T		T	A
scaffold_103	C	111886						T								C		C	T
scaffold_103	T	112866														A		A	--
scaffold_103	A	112875														T		T	--
scaffold_103	A	114074														A		A	--
scaffold_103	T	114172														T		T	--
scaffold_103	G	118810														T		T	--
scaffold_107	G	12382				G				A		A						G	A
scaffold_107	A	13913				A				G		G				A		A	G
scaffold_107	A	18318				A				G		G						A	G
scaffold_107	T	18415				T				A		A						T	A
scaffold_107	T	20008				C				T		T					C	C	T
scaffold_107	A	24937								G		G						--	G
scaffold_107	C	25189					T			T		T						--	T
scaffold_107	T	36919					G			G								--	G
scaffold_107	A	38339					T			T				A				A	T
scaffold_107	G	39419								A				G				G	A
scaffold_107	A	39473					T			T				A				A	T
scaffold_107	G	41349					A			A				G				G	A
scaffold_107	T	44578	C				T					T		C				C	T
scaffold_107	G	44817	G				A					A		G				G	A
scaffold_107	G	44872	G				A					A		G				G	A
scaffold_107	T	44927	T				C					C		T				T	C
scaffold_107	C	45066	A				C					C		A				A	C
scaffold_107	C	45186	T				C		C			C		T				T	C
scaffold_107	C	45400	T				C					C		T				T	C
scaffold_107	C	45564	T				C					C		T				T	C
scaffold_107	C	45759	T				C					C		T				T	C
scaffold_107	G	45778	A				G					G		A				A	G
scaffold_107	G	47414	G		G		A		A			A						G	A
scaffold_111	T	14425							C									--	C
scaffold_111	C	14447							T									--	T
scaffold_111	T	14482							A									--	A
scaffold_111	T	16656				C			T									C	T
scaffold_111	A	17237				A			T									A	T
scaffold_111	C	17255				C			T									C	T
scaffold_111	A	17340				A			T									A	T
scaffold_111	A	17380				A			G									A	G
scaffold_111	C	21602				T			C									T	C
scaffold_111	T	21816				A												A	--
scaffold_111	A	21861				T			A									T	A
scaffold_111	C	22672				T												T	--
scaffold_111	A	28930				C			A									C	A
scaffold_111	T	30729				G			T									G	T
scaffold_111	C	30835				T			C									T	C
scaffold_111	A	41816				C	A		A									C	A
scaffold_111	A	42412			A	A	G											A	G
scaffold_111	T	43731			T	T	C		C					C				T	C
scaffold_111	A	44043			C	C	A		A									C	A
scaffold_111	A	44637			C	C	A		A			A						C	A
scaffold_111	G	44715			A	A	G		G									A	G
scaffold_111	G	44748			A	A	G		G									A	G
scaffold_111	A	44862				G	A					A						G	A
scaffold_111	T	44947		T	A	A	T											A	T
scaffold_111	A	44972			T	T	A		A									T	A
scaffold_111	C	44991			T	T	C		C									T	C
scaffold_111	A	45070			G	G	A		A			A		A				G	A
scaffold_111	T	45531			T	T	C		C									T	C
scaffold_111	A	45611			A	A	G		G									A	G
scaffold_111	C	45623			C	C	T		T									C	T
scaffold_111	T	50119			C	C	T		T									C	T
scaffold_111	A	50484			G	G	A		A			A						G	A
scaffold_111	G	50884			A		G		G									A	G
scaffold_111	C	51106			C		T											C	T
scaffold_111	A	51309			C		A											C	A
scaffold_111	T	51673			A		T											A	T
scaffold_111	A	57876			A		T											A	T
scaffold_111	C	58314			C		T											C	T
scaffold_111	A	64935			T													T	--
scaffold_111	C	64962			T		C											T	C
scaffold_111	C	76512			T													T	--
scaffold_111	C	94757					T											--	T
scaffold_111	G	98668					A											--	A
scaffold_111	C	98802					A											--	A
scaffold_111	C	113041						T										--	T
scaffold_111	C	115575						T										--	T
scaffold_111	A	116941						A	A									--	A
scaffold_112	T	18422								T								--	T
scaffold_113	T	43513							C			C						--	C
scaffold_113	A	59858				A			G			G						A	G
scaffold_113	T	60624				T						C						T	C
scaffold_113	T	60745				T			A			A						T	A
scaffold_113	T	60850				G						T						G	T
scaffold_113	T	61464				T			G			G						T	G
scaffold_113	G	61495				G			T			T						G	T
scaffold_113	C	62005				A			C			C						A	C
scaffold_113	C	62263				T			C			C				T		T	C
scaffold_113	T	62287				C			T			T				C		C	T
scaffold_113	T	62573				T						C				T		T	C
scaffold_113	G	62742				G						A				G		G	A
scaffold_113	T	62810				T												T	--
scaffold_113	T	63129				T						C				T		T	C
scaffold_113	G	63533				T						G				T		T	G
scaffold_113	C	63679				C										C		C	--
scaffold_113	A	63707														A		A	--
scaffold_113	T	63885										A				T		T	A
scaffold_113	G	64154				G						A				G		G	A
scaffold_113	G	69354														G		G	--
scaffold_113	T	69372										C				T		T	C
scaffold_113	T	69397										A				T		T	A
scaffold_113	T	89301			T	T												T	--
scaffold_113	G	95208			A	A												A	--
scaffold_113	A	100474			G	G								G				G	--
scaffold_113	T	100596				C								C				C	--
scaffold_113	G	101121			A	A								A				A	--
scaffold_113	A	101923			G	G												G	--
scaffold_115	T	1697												A				A	--
scaffold_115	T	2930												T				T	--
scaffold_115	C	3297												T				T	--
scaffold_115	A	4051												G				G	--
scaffold_115	A	4347												A				A	--
scaffold_115	G	4359												G				G	--
scaffold_115	G	4376												G				G	--
scaffold_115	T	14495												C				C	--
scaffold_115	C	15772												T				T	--
scaffold_115	A	15883												T				T	--
scaffold_115	C	17548										T		C				C	T
scaffold_115	T	17714										T		C				C	T
scaffold_115	A	17933										G		A				A	G
scaffold_115	G	18598										A		G				G	A
scaffold_115	G	18701										A		G				G	A
scaffold_115	A	18757										A		G				G	A
scaffold_115	T	18881										T		C				C	T
scaffold_115	T	19028										T		C				C	T
scaffold_115	T	19161										T		A				A	T
scaffold_115	C	19956										T		C				C	T
scaffold_115	A	21741										A		G				G	A
scaffold_115	A	21799										A		T				T	A
scaffold_115	A	22376	A									G		A				A	G
scaffold_115	T	23021	C									T		C				C	T
scaffold_115	G	23052	A									G		A				A	G
scaffold_115	G	23071	A									G		A				A	G
scaffold_115	C	23087	T									C		T				T	C
scaffold_115	A	24101										T		A				A	T
scaffold_115	A	25383	A									G		A				A	G
scaffold_115	T	26162	T									A		T				T	A
scaffold_115	C	29490	C									T		C				C	T
scaffold_115	T	29509	T									C		T				T	C
scaffold_115	T	33379	T			T						C		T				T	C
scaffold_115	G	33842	A			A						G		A				A	G
scaffold_115	A	33916	A			A						G		A				A	G
scaffold_115	A	35899	T			T					A	A		T				T	A
scaffold_115	G	36038	A			A						G		A				A	G
scaffold_115	C	36183	T			T						C		T				T	C
scaffold_115	G	36849	G			G						A		G				G	A
scaffold_115	A	36894	A			A					G	G		A				A	G
scaffold_115	T	37001	C			C						T		C				C	T
scaffold_115	T	37016	C			C						T		C				C	T
scaffold_115	C	37022	T			T						C		T				T	C
scaffold_115	A	37043	T			T						A		T				T	A
scaffold_115	A	37058	T			T						A		T				T	A
scaffold_115	T	37093	C			C					T	T		C				C	T
scaffold_115	A	37243	A			A						G		A				A	G
scaffold_115	A	37249	A			A						T		A				A	T
scaffold_115	C	37319	T			T					C	C		T				T	C
scaffold_115	C	37397	C			C						G		C				C	G
scaffold_115	T	37459	A			A					T	T		A				A	T
scaffold_115	T	37525	T			T					C	C		T				T	C
scaffold_115	G	37568	T			T					G	G		T				T	G
scaffold_115	G	37990	T			T						G		T				T	G
scaffold_115	A	38069	A			A					G	G		A				A	G
scaffold_115	G	38919	A			A						G		A				A	G
scaffold_115	G	39598	A			A						G		A				A	G
scaffold_115	T	42862	C			C					T	T		C				C	T
scaffold_115	G	42947	A			A					G	G		A				A	G
scaffold_115	A	48292				C								C				C	--
scaffold_115	G	48408				T					G			T				T	G
scaffold_115	T	48857				C								C				C	--
scaffold_115	A	49035				A								A				A	--
scaffold_115	G	50314	A			A						G		A				A	G
scaffold_115	C	50713	T			T						C		T				T	C
scaffold_115	C	51254	T			T						C		T				T	C
scaffold_115	C	53135				C								C				C	--
scaffold_115	G	53152				G						A		G				G	A
scaffold_115	C	53389				C								C				C	--
scaffold_115	G	53408				G								G				G	--
scaffold_115	G	53548				G						A		G				G	A
scaffold_115	G	53776				G						T		G				G	T
scaffold_115	C	53878				T								T				T	--
scaffold_115	A	68139	T	A	T		A		A	A				T				T	A
scaffold_115	G	69551		G					G	G								--	G
scaffold_115	A	69632		A					A	A				G				G	A
scaffold_115	C	69692	T	C					C	C				T				T	C
scaffold_115	C	69713	T	C					C	C				T				T	C
scaffold_115	T	69937		C					C	C								--	C
scaffold_115	C	69975	C	T	C				T	T								C	T
scaffold_115	A	70653	A	T					T	T				A				A	T
scaffold_115	T	70787	T	C					C	C								T	C
scaffold_115	C	71122	T	C					C	C								T	C
scaffold_115	A	71650	G	A	G				A	A								G	A
scaffold_115	T	71863	C	T	C				T	T								C	T
scaffold_115	C	71933	T						C	C								T	C
scaffold_115	C	72379							T									--	T
scaffold_115	G	72409		A					A									--	A
scaffold_115	G	72443		T					T	T								--	T
scaffold_115	G	72712	G	A					A	A								G	A
scaffold_115	A	72897	A	G	A				G	G								A	G
scaffold_115	C	73124	T						C									T	C
scaffold_115	G	73213	A						G									A	G
scaffold_115	G	88396					G											--	G
scaffold_115	T	88414					T											--	T
scaffold_115	C	105006					T											--	T
scaffold_118	C	3947			T													T	--
scaffold_118	A	5646			A													A	--
scaffold_118	C	13670			C													C	--
scaffold_118	T	25458			C													C	--
scaffold_118	A	26878			T													T	--
scaffold_118	C	28506			G													G	--
scaffold_118	T	28761	G		G													G	--
scaffold_118	T	33645	T		T													T	--
scaffold_118	T	55143	C															C	--
scaffold_118	T	61824	A															A	--
scaffold_118	A	67380	G															G	--
scaffold_118	T	71099	A				T											A	T
scaffold_118	T	82972	C															C	--
scaffold_118	C	83521	T															T	--
scaffold_118	A	83947	G															G	--
scaffold_118	A	85432	G															G	--
scaffold_118	T	100365	C															C	--
scaffold_120	C	371										C						--	C
scaffold_120	T	603				C						T						C	T
scaffold_120	A	14168				G								G				G	--
scaffold_120	T	19728				C								C				C	--
scaffold_120	A	24166				A			G					A				A	G
scaffold_120	C	25906				T			C					T				T	C
scaffold_120	G	26782				G								G				G	--
scaffold_120	T	38770											T	C				C	T
scaffold_120	T	39031	C										T	C				C	T
scaffold_120	A	41304											A	G				G	A
scaffold_120	T	42012											C					--	C
scaffold_120	G	42049											A					--	A
scaffold_120	C	42122											T					--	T
scaffold_120	G	42147											A					--	A
scaffold_120	C	42272											T	C				C	T
scaffold_120	A	42410											G					--	G
scaffold_120	C	42561											C					--	C
scaffold_120	C	42861											C					--	C
scaffold_120	C	42989											C	T				T	C
scaffold_120	T	43410											G					--	G
scaffold_120	C	43761											C					--	C
scaffold_120	G	45416											A					--	A
scaffold_120	T	48724		C														--	C
scaffold_120	T	50811		A														--	A
scaffold_120	A	56284		A		G												G	A
scaffold_120	T	56371		T		A												A	T
scaffold_120	C	56384		C														--	C
scaffold_120	A	56394		A														--	A
scaffold_120	A	56458		A		C												C	A
scaffold_120	A	61714		A														--	A
scaffold_120	G	61842		G														--	G
scaffold_120	C	66746		C			C											--	C
scaffold_120	G	71206		A			A	A										--	A
scaffold_120	A	78057		A		T												T	A
scaffold_120	A	81310				A												A	--
scaffold_120	G	81877				A												A	--
scaffold_120	G	82348				T												T	--
scaffold_120	C	89333										T						--	T
scaffold_120	C	89367										T						--	T
scaffold_120	A	90833										A						--	A
scaffold_120	A	91644										C						--	C
scaffold_120	A	91653										G						--	G
scaffold_120	A	92157										A						--	A
scaffold_120	T	92186										T						--	T
scaffold_120	T	96238										G						--	G
scaffold_120	T	96298										A						--	A
scaffold_120	A	97314										A						--	A
scaffold_120	A	98528										G						--	G
scaffold_123	A	94078		G														--	G
scaffold_123	A	95106		A														--	A
scaffold_123	T	95595		T														--	T
scaffold_123	C	95622		C														--	C
scaffold_123	A	95678		A														--	A
scaffold_123	A	95694		A														--	A
scaffold_123	T	95751		T														--	T
scaffold_123	T	95765	C	T														C	T
scaffold_123	G	96063		G														--	G
scaffold_123	G	96299		G														--	G
scaffold_123	A	96408	G	A														G	A
scaffold_123	G	96459	G	A														G	A
scaffold_123	A	96462		A														--	A
scaffold_123	T	96491		T														--	T
scaffold_123	T	96687	C	C														--	C
scaffold_123	A	96704	G	A														G	A
scaffold_123	T	96820		T														--	T
scaffold_123	T	103998		T														--	T
scaffold_123	G	104037		G														--	G
scaffold_123	T	104095		T														--	T
scaffold_125	C	10619								T								--	T
scaffold_125	T	10626								C								--	C
scaffold_125	A	16420								G		G						--	G
scaffold_125	T	16571								C		C						--	C
scaffold_125	G	17316								A		A						--	A
scaffold_125	G	18772								A	A	A						--	A
scaffold_125	A	18814								G	G	G						--	G
scaffold_125	T	19544								A		A						--	A
scaffold_125	G	19582				G				A		A						G	A
scaffold_125	G	19775								A		A						--	A
scaffold_125	T	19947								C	C	C						--	C
scaffold_125	C	20055								T	T	T						--	T
scaffold_125	C	20305								T	T	T						--	T
scaffold_125	A	20315								C	C	C						--	C
scaffold_125	C	20424				C				T	T	T						C	T
scaffold_125	A	20443				A				G	G	G						A	G
scaffold_125	G	24059								C	C	C						--	C
scaffold_125	A	24065								T	T	T						--	T
scaffold_125	A	24109								G	G	G						--	G
scaffold_125	T	24142									A	A						--	A
scaffold_125	G	24161								A	A	A						--	A
scaffold_125	T	24282				A				T	T	T						A	T
scaffold_125	A	24299				G				A	A	A						G	A
scaffold_125	T	24387				C				T	T	T						C	T
scaffold_125	T	24418								T	T	T						--	T
scaffold_125	C	24450								C	C	C						--	C
scaffold_125	G	41308										A						--	A
scaffold_125	A	44553						T		T		T						--	T
scaffold_125	A	44611						G		G		G						--	G
scaffold_125	T	45073						C				C						--	C
scaffold_125	T	45790						C				C						--	C
scaffold_125	T	46550						C				C						--	C
scaffold_125	C	50205						T				T						--	T
scaffold_125	C	50664						T				T						--	T
scaffold_125	C	50942						T				T						--	T
scaffold_125	T	51642						C										--	C
scaffold_125	C	81208	T					C										T	C
scaffold_125	A	82066	A					T										A	T
scaffold_125	A	83281	C															C	--
scaffold_125	G	88590	G			G			A	A								G	A
scaffold_125	T	89070	A			A												A	--
scaffold_125	T	90120	A						T									A	T
scaffold_125	A	96912							T									--	T
scaffold_125	G	96932							T									--	T
scaffold_125	T	102870								C								--	C
scaffold_125	T	136899								C								--	C
scaffold_126	A	3079			G			A	A		A							G	A
scaffold_126	G	3222			A				G		G							A	G
scaffold_126	G	11470			G			A	A	A	A							G	A
scaffold_126	G	11480			G			A	A	A								G	A
scaffold_126	C	11784			C			T	T	T								C	T
scaffold_126	T	21943			T			C		C								T	C
scaffold_126	C	22076			C			T		T								C	T
scaffold_126	C	22108			C			T		T								C	T
scaffold_126	T	27025							C									--	C
scaffold_126	C	29064							C									--	C
scaffold_126	C	47328							C	C								--	C
scaffold_126	G	47572							A	A								--	A
scaffold_126	T	47595							A	A								--	A
scaffold_126	T	47669							A									--	A
scaffold_126	T	50353							C	C								--	C
scaffold_126	C	56662							T	T								--	T
scaffold_126	T	61298						G		G								--	G
scaffold_126	T	80421										G		T				T	G
scaffold_126	G	80572										G		T				T	G
scaffold_126	T	80647										C		T				T	C
scaffold_126	T	85349										A		T				T	A
scaffold_126	A	85484										G						--	G
scaffold_126	A	90494										A						--	A
scaffold_126	T	104886				T												T	--
scaffold_126	A	105650				C												C	--
scaffold_126	T	107423				C						T						C	T
scaffold_126	A	107572				G						A						G	A
scaffold_126	A	112606				C						A						C	A
scaffold_126	C	116382				T						C						T	C
scaffold_126	A	116447				T						A						T	A
scaffold_126	C	129068			T							C						T	C
scaffold_126	G	130906			G							T						G	T
scaffold_126	T	131242			T							C						T	C
scaffold_126	T	131259			T							C						T	C
scaffold_126	T	131266			T							C						T	C
scaffold_126	T	131440			T							C						T	C
scaffold_126	C	131509			T							C						T	C
scaffold_126	A	132444			T													T	--
scaffold_126	G	132755			G							A						G	A
scaffold_126	T	132989			T							C						T	C
scaffold_126	C	134513			C				G			G						C	G
scaffold_126	C	135046			C	C			A			A						C	A
scaffold_131	T	4624	C									T						C	T
scaffold_131	A	4822	T									A						T	A
scaffold_131	A	5206	G	A								A						G	A
scaffold_131	T	5282	C									T						C	T
scaffold_131	T	27454										C						--	C
scaffold_131	T	61291						C										--	C
scaffold_131	G	61333						A										--	A
scaffold_131	A	67246						G										--	G
scaffold_131	A	67264						T										--	T
scaffold_131	T	70811						A										--	A
scaffold_131	T	77007		C		T												T	C
scaffold_131	T	80519		C		T												T	C
scaffold_131	T	80731		C		T												T	C
scaffold_131	T	80899		C		T												T	C
scaffold_131	C	80959		T		C												C	T
scaffold_131	G	81003		A		G												G	A
scaffold_131	T	81248		A		T												T	A
scaffold_131	A	81648		C		A												A	C
scaffold_131	A	89412		G		A												A	G
scaffold_131	T	90135		T		A												A	T
scaffold_131	T	90220		T		C												C	T
scaffold_131	A	90261		A		G												G	A
scaffold_131	G	90619		G		A												A	G
scaffold_131	T	90635		T		A												A	T
scaffold_131	G	90984		A		G												G	A
scaffold_131	T	91100		T		C												C	T
scaffold_131	A	91112		A		T												T	A
scaffold_131	A	91191		A		T									A			T	A
scaffold_131	G	91752		G		A												A	G
scaffold_131	A	92038		G														--	G
scaffold_131	A	92549				T												T	--
scaffold_131	A	92555				T												T	--
scaffold_131	T	92975				C												C	--
scaffold_131	A	93156				G												G	--
scaffold_131	A	110031					C											--	C
scaffold_131	C	110112					C											--	C
scaffold_131	A	110126					A											--	A
scaffold_132	T	5396	T												C			T	C
scaffold_132	C	11203	T															T	--
scaffold_132	G	11252	A															A	--
scaffold_132	G	11459	G		G													G	--
scaffold_132	T	11640	C		C													C	--
scaffold_132	A	17360	A		A													A	--
scaffold_132	A	33140			A													A	--
scaffold_132	C	34949			G													G	--
scaffold_132	T	41564			A													A	--
scaffold_132	G	41883			A													A	--
scaffold_132	T	41993			C													C	--
scaffold_132	C	44237			T													T	--
scaffold_132	G	46378			A													A	--
scaffold_132	T	46979			C													C	--
scaffold_132	A	47530			C													C	--
scaffold_132	G	78231			G													G	--
scaffold_132	G	86027			A													A	--
scaffold_132	A	92010			A													A	--
scaffold_132	A	92492						T										--	T
scaffold_132	T	95831						T										--	T
scaffold_139	T	137150		G				G										--	G
scaffold_141	T	9545								T				C				C	T
scaffold_144	C	13013			C											C		C	--
scaffold_144	A	16097			G													G	--
scaffold_144	G	17369			A							G						A	G
scaffold_144	T	18285			C							T						C	T
scaffold_144	C	19494			C							T						C	T
scaffold_144	T	30733										C						--	C
scaffold_144	A	32029						C				C						--	C
scaffold_144	T	32040										G						--	G
scaffold_144	A	32199										T						--	T
scaffold_144	A	33886										G						--	G
scaffold_144	C	33932										T						--	T
scaffold_144	T	43114										C						--	C
scaffold_144	A	43147										G						--	G
scaffold_144	C	43197										T						--	T
scaffold_144	G	43214										T						--	T
scaffold_144	C	44040										T						--	T
scaffold_144	T	49567					G											--	G
scaffold_144	C	54849		T														T	--
scaffold_144	A	55347		T														T	--
scaffold_144	T	55995		C														C	--
scaffold_144	A	56057		G														G	--
scaffold_144	A	59193		G														G	--
scaffold_144	T	59220						C										--	C
scaffold_144	C	66131		A								A						A	--
scaffold_144	C	70748								G								--	G
scaffold_144	G	80868						A										--	A
scaffold_144	A	80972						G										--	G
scaffold_144	G	80996						A										--	A
scaffold_144	A	81013						T										--	T
scaffold_144	G	81158						A										--	A
scaffold_144	A	81186		G				G										--	G
scaffold_144	T	82538						G										--	G
scaffold_144	T	82563						C										--	C
scaffold_144	G	86568						A										--	A
scaffold_144	C	103858		T				T		T								--	T
scaffold_145	C	657			T				C									T	C
scaffold_145	A	774			C													C	--
scaffold_145	A	906	G		G													G	--
scaffold_145	T	1191	T		T				C									T	C
scaffold_145	A	1283	A		A				G									A	G
scaffold_145	A	2024	C		C				A									C	A
scaffold_145	T	5743	A		A													A	--
scaffold_145	A	5895	C		C													C	--
scaffold_145	C	7726			C				T									C	T
scaffold_145	C	7759			C													C	--
scaffold_145	T	7862			T				C									T	C
scaffold_145	T	9497	G		G													G	--
scaffold_145	T	24014				G												G	--
scaffold_145	T	29610				T							C					T	C
scaffold_145	G	32276											C					--	C
scaffold_145	T	41925						T										--	T
scaffold_145	C	46301						C										--	C
scaffold_145	T	46760						C										--	C
scaffold_145	G	61697						A										--	A
scaffold_145	G	61907		A														A	--
scaffold_145	T	62055		A														A	--
scaffold_146	T	103889				A	T		T									A	T
scaffold_147	C	58806										C						--	C
scaffold_147	A	60249			A							T						A	T
scaffold_147	C	60278			C							T						C	T
scaffold_147	C	60366			C							T						C	T
scaffold_147	C	60577			C							T						C	T
scaffold_147	G	64626			A							G						A	G
scaffold_147	A	64663										A						--	A
scaffold_147	A	74059			C													C	--
scaffold_147	G	74486							A									--	A
scaffold_147	C	90873		T	C			T	T			T		C				C	T
scaffold_147	A	96897			G			A	A									G	A
scaffold_147	A	103389		G	A			G										A	G
scaffold_147	A	104947	G		G				G	G				G				G	--
scaffold_150	T	12678		C	T													T	C
scaffold_150	C	12872		C	T													T	C
scaffold_150	T	12878		T	C													C	T
scaffold_150	A	13266		A	G													G	A
scaffold_150	G	18441		G	A													A	G
scaffold_150	C	18761		T	C													C	T
scaffold_150	G	18812		A	G													G	A
scaffold_150	A	19297	T	A	T													T	A
scaffold_150	A	19322	C	A	C													C	A
scaffold_150	A	19400	A	G	A													A	G
scaffold_150	G	19417	G		G													G	--
scaffold_150	C	19425	C		C													C	--
scaffold_150	T	19444	T		T													T	--
scaffold_150	T	19816	T	C	T													T	C
scaffold_150	A	19935	A	T	A													A	T
scaffold_150	C	19976		T	C													C	T
scaffold_150	C	19998			C													C	--
scaffold_150	G	20652	G	A	G													G	A
scaffold_150	G	20970	G	A	G													G	A
scaffold_150	G	24250	A	G														A	G
scaffold_150	G	24290	A	G	A													A	G
scaffold_150	C	24842	C	T	C													C	T
scaffold_150	G	24920	G	T	G													G	T
scaffold_150	C	24933	C	T	C													C	T
scaffold_150	A	30678	G		G													G	--
scaffold_150	G	31569	A						G									A	G
scaffold_150	G	32037	G						A									G	A
scaffold_150	C	35699	C						T									C	T
scaffold_150	A	35883	A						T					A				A	T
scaffold_150	A	39805							A									--	A
scaffold_150	T	76949						T										--	T
scaffold_150	T	90867						G										--	G
scaffold_151	C	1820								G								--	G
scaffold_151	A	1883								G								--	G
scaffold_151	A	1940								T								--	T
scaffold_151	G	2424								A								--	A
scaffold_151	C	25916	T															T	--
scaffold_151	A	26825	T															T	--
scaffold_151	A	27658		A														A	--
scaffold_151	T	28046	C															C	--
scaffold_151	T	28072	C															C	--
scaffold_151	A	32535			A													A	--
scaffold_151	T	32839			T													T	--
scaffold_151	A	33632		A	G													G	A
scaffold_151	A	33775			C	C												C	--
scaffold_151	T	35312		T	C													C	T
scaffold_151	T	36104			C													C	--
scaffold_151	T	36203			C													C	--
scaffold_151	T	36702			T													T	--
scaffold_151	A	37122			A													A	--
scaffold_151	T	40174			T													T	--
scaffold_151	A	40835			C													C	--
scaffold_151	T	50732						C										--	C
scaffold_151	T	51906						C										--	C
scaffold_151	C	52449						T										--	T
scaffold_151	T	59284						C										--	C
scaffold_151	C	59795						T										--	T
scaffold_151	A	61003						C										--	C
scaffold_151	T	67047						C										--	C
scaffold_151	T	67128						G										--	G
scaffold_151	T	73096						G										--	G
scaffold_151	C	76929						A										--	A
scaffold_151	C	77362						T										--	T
scaffold_151	G	77576						T										--	T
scaffold_151	C	80666						C										--	C
scaffold_151	T	91881											C					--	C
scaffold_151	G	92053											T					--	T
scaffold_151	T	102452											C					--	C
scaffold_152	T	1097								C								--	C
scaffold_152	T	3845								A								--	A
scaffold_152	A	4099								G								--	G
scaffold_152	G	8406								A								--	A
scaffold_152	A	9014								G				G				--	G
scaffold_152	C	9128								T								--	T
scaffold_152	T	9684								G								--	G
scaffold_152	A	9804								G								--	G
scaffold_152	G	10255								A				A				--	A
scaffold_152	T	78793						T										--	T
scaffold_152	C	80178						C										--	C
scaffold_152	G	82654	A					G										A	G
scaffold_152	A	82742	G					A										G	A
scaffold_152	C	83016	T					C										T	C
scaffold_152	A	86569	A					G										A	G
scaffold_152	G	86749	G					A										G	A
scaffold_152	T	88832	C		C			T										C	T
scaffold_152	A	88856	C		C			A										C	A
scaffold_152	G	93406	G		G			A										G	A
scaffold_152	T	94207	T		T			A										T	A
scaffold_152	G	94505	A					G										A	G
scaffold_152	A	95329	A					G										A	G
scaffold_152	T	96096	T		T			C										T	C
scaffold_152	T	96233	T		T			C										T	C
scaffold_152	A	100282			T			A										T	A
scaffold_152	T	100291			C			T										C	T
scaffold_152	T	100327			C			T										C	T
scaffold_152	T	100354			G			T										G	T
scaffold_152	G	100366			A			G										A	G
scaffold_152	T	100371			A			T										A	T
scaffold_152	T	100385			C			T										C	T
scaffold_152	A	100399			T			A										T	A
scaffold_152	A	100463						A										--	A
scaffold_152	T	101375			C			T										C	T
scaffold_153	T	2345			C											C		C	--
scaffold_153	T	13927										A						--	A
scaffold_153	T	29006															T	T	--
scaffold_153	C	29031										A					C	C	A
scaffold_153	G	29191										A					G	G	A
scaffold_153	G	29478										G					T	T	G
scaffold_153	A	29679										A					T	T	A
scaffold_153	A	29711										T					A	A	T
scaffold_153	A	30097										A					G	G	A
scaffold_153	C	31149										C		T			T	T	C
scaffold_153	G	31512										T						--	T
scaffold_153	T	31594										C					T	T	C
scaffold_153	T	31833										T					C	C	T
scaffold_153	A	32809										A					G	G	A
scaffold_153	C	32901										C					T	T	C
scaffold_153	T	36279								A		A						--	A
scaffold_153	C	46423								A		A						--	A
scaffold_153	T	48489								C		C						--	C
scaffold_153	A	64504	G									A						G	A
scaffold_153	C	65061	T									C						T	C
scaffold_153	G	65116	A									G						A	G
scaffold_153	C	65255	T									C						T	C
scaffold_153	A	67772	A									T						A	T
scaffold_153	T	75081	C															C	--
scaffold_153	A	77753	C															C	--
scaffold_153	G	77773	T															T	--
scaffold_153	C	83574	C															C	--
scaffold_153	A	85408	A															A	--
scaffold_153	A	85420	A															A	--
scaffold_153	T	87099	T					C										T	C
scaffold_153	C	90276	C															C	--
scaffold_153	A	90548	A															A	--
scaffold_156	A	867		G	A							G				A		A	G
scaffold_156	G	1372		G	A							G				A		A	G
scaffold_156	G	1564		G												A		A	G
scaffold_156	T	1763		T								T				C		C	T
scaffold_156	T	17620	C															C	--
scaffold_156	T	35149										C						--	C
scaffold_156	C	38044										T						--	T
scaffold_156	A	38086										G						--	G
scaffold_156	C	47408								A								--	A
scaffold_156	T	53036					A			A								--	A
scaffold_156	G	60978					A		A			A						--	A
scaffold_156	G	63924					A					A						--	A
scaffold_156	G	68975										A						--	A
scaffold_156	C	68991										T						--	T
scaffold_156	G	69028										A						--	A
scaffold_156	A	71088										T						--	T
scaffold_156	T	76389						C										--	C
scaffold_156	A	77419						G										--	G
scaffold_156	C	87817					T											--	T
scaffold_156	G	88875					A	A										--	A
scaffold_156	C	88897					T	T										--	T
scaffold_156	T	88939					C	C										--	C
scaffold_156	C	89050					T	T										--	T
scaffold_156	A	89373					G	G										--	G
scaffold_156	G	94723					A	A										--	A
scaffold_156	T	94741					A	A										--	A
scaffold_156	G	94749					A	A										--	A
scaffold_159	T	107038	C							T								C	T
scaffold_159	A	108985	A							T								A	T
scaffold_159	C	110803	T							C								T	C
scaffold_159	C	113120	G															G	--
scaffold_159	A	113618	A															A	--
scaffold_159	T	114843	T															T	--
scaffold_159	A	115028	A															A	--
scaffold_159	A	116759						G										--	G
scaffold_159	A	116916						T										--	T
scaffold_159	G	117558						C										--	C
scaffold_159	G	119225						G										--	G
scaffold_159	A	119231						A										--	A
scaffold_159	A	123052						A										--	A
scaffold_159	G	124594			G			A										G	A
scaffold_159	C	124607			C			T										C	T
scaffold_159	C	125758			T			C		C								T	C
scaffold_159	C	126531			T			C		C					T			T	C
scaffold_159	C	126537			T			C		C								T	C
scaffold_159	T	126567			C			T		T								C	T
scaffold_159	G	126629			A			G		G								A	G
scaffold_159	T	126671			G			T		T								G	T
scaffold_159	G	130962			A			G		G								A	G
scaffold_159	T	131364			T			G		G								T	G
scaffold_159	G	133598			A			G		G								A	G
scaffold_161	C	15438						T										--	T
scaffold_161	G	62641								A					G			G	A
scaffold_161	A	89725						G		G								--	G
scaffold_161	T	89773						C		C								--	C
scaffold_161	G	89818						A		A								--	A
scaffold_161	T	94764						C										--	C
scaffold_161	T	101156						C										--	C
scaffold_162	A	1099		C			C											--	C
scaffold_162	C	1327		A			A											--	A
scaffold_162	A	1333		G			G											--	G
scaffold_162	C	8906		T			T											--	T
scaffold_162	G	9278		T			T											--	T
scaffold_162	T	18143			T			A										T	A
scaffold_162	G	18679			G			A										G	A
scaffold_162	T	20342			A			T										A	T
scaffold_162	A	21493			A			G										A	G
scaffold_162	A	23370			A													A	--
scaffold_162	A	23576			A													A	--
scaffold_162	A	25829			A													A	--
scaffold_162	A	46539			G			A	A									G	A
scaffold_162	A	46629			A			G										A	G
scaffold_162	C	51980			T			C										T	C
scaffold_162	T	52164			G			T										G	T
scaffold_162	G	52192			T			G										T	G
scaffold_162	G	52260			A			G										A	G
scaffold_162	A	53397			T			A										T	A
scaffold_162	T	53405			C			T										C	T
scaffold_162	A	53470			A			G										A	G
scaffold_162	A	53551			G			A										G	A
scaffold_162	A	53578			G			A										G	A
scaffold_162	G	53618			A			G										A	G
scaffold_162	A	53716			G			A										G	A
scaffold_162	A	53869			A			G										A	G
scaffold_162	A	57844			A			G										A	G
scaffold_162	C	58287						C										T	C
scaffold_162	G	58503			A			G										A	G
scaffold_162	A	58569			G			A										G	A
scaffold_162	G	61402						G										--	G
scaffold_162	G	62746			A			G										A	G
scaffold_163	G	1463			A			G										A	G
scaffold_163	C	1685			C		T	T										C	T
scaffold_163	A	43864						T						A				A	T
scaffold_163	T	51268						C										--	C
scaffold_163	A	93184			A				T									A	T
scaffold_163	A	104221			T													T	--
scaffold_164	A	10628			A		T					T						A	T
scaffold_164	C	11600			T		C	C				C						T	C
scaffold_164	T	12570			C		T	T				T						C	T
scaffold_164	C	12578			T		C	C				C						T	C
scaffold_164	G	12601			T		G	G				G						T	G
scaffold_164	G	12721			A		G	G				G						A	G
scaffold_164	C	12851			T	T	C	C				C						T	C
scaffold_164	T	16990			T		C	C				C						T	C
scaffold_164	C	17038			A		C	C				C						A	C
scaffold_164	C	17250			T		C	C				C						T	C
scaffold_164	C	22419			T			C				C						T	C
scaffold_164	C	22466			T			C				C						T	C
scaffold_164	A	22518			G			A				A						G	A
scaffold_164	G	22595			A			G				G						A	G
scaffold_164	T	22600			C			T				T						C	T
scaffold_164	T	22916			C			T				T						C	T
scaffold_164	A	23095			G			A				A						G	A
scaffold_164	C	48532	T															T	--
scaffold_164	C	56315			T		C										T	T	C
scaffold_164	C	73508				T												T	--
scaffold_164	G	90584		G														G	--
scaffold_164	T	92401		C														C	--
scaffold_168	G	15179										A						--	A
scaffold_168	A	15400								G		G						--	G
scaffold_168	C	15767										A						--	A
scaffold_168	T	19671								A		A		A				--	A
scaffold_168	T	24981								C		C		C				--	C
scaffold_168	T	37524								T								--	T
scaffold_168	T	63532			C					T		T						C	T
scaffold_168	T	65186			C		T			T		T						C	T
scaffold_168	A	65402			C		A			A		A						C	A
scaffold_168	A	66187			C		A	A		A								C	A
scaffold_168	A	67963			A		G			G								A	G
scaffold_168	T	70690			T		C					C						T	C
scaffold_168	T	71029			G		T					T						G	T
scaffold_168	C	75868			C													C	--
scaffold_168	C	79505							C									--	C
scaffold_168	A	79915			A				G									A	G
scaffold_168	A	88800							T									--	T
scaffold_168	A	90083			A				G									A	G
scaffold_168	C	95901			T													T	--
scaffold_168	A	99303												T				T	--
scaffold_169	G	27719											A					--	A
scaffold_169	G	27777											A					--	A
scaffold_169	T	82821						T										--	T
scaffold_169	G	84883	G															G	--
scaffold_169	A	85982	T					A										T	A
scaffold_171	C	98778		T		C												C	T
scaffold_174	A	21267			C													C	--
scaffold_176	C	61127	T			C								C				C	T
scaffold_176	A	61394	T			A								A				A	T
scaffold_176	G	62783	A			G								G				G	A
scaffold_176	A	67903				G								G				G	--
scaffold_176	G	67936				A								A				A	--
scaffold_179	A	97044						A				A		A		G		G	A
scaffold_184	G	70632			A													A	--
scaffold_184	T	84466					T										A	A	T
scaffold_184	T	87067			T		C										T	T	C
scaffold_184	T	88120			C		T										C	C	T
scaffold_184	C	91246			A												A	A	--
scaffold_184	A	91661			A												A	A	--
scaffold_187	G	88854				A												A	--
scaffold_189	T	12230				C		T										C	T
scaffold_189	A	12245				G		A										G	A
scaffold_189	T	12262				C		T										C	T
scaffold_189	T	12278				C		T										C	T
scaffold_190	T	530					T		T	T					C			C	T
scaffold_190	G	577					A		A	A					G			G	A
scaffold_190	C	900					T		T	T		T						--	T
scaffold_190	A	989							G	G								--	G
scaffold_190	T	2059					A		A	A	A	A						--	A
scaffold_190	A	10342			G													G	--
scaffold_190	T	10354			G													G	--
scaffold_190	T	16689			T							C						T	C
scaffold_190	A	17583			G													G	--
scaffold_190	C	19930			C							A						C	A
scaffold_190	G	31897			G													G	C
scaffold_190	C	33332			T							C						T	C
scaffold_190	T	33596			G													G	--
scaffold_190	T	35310			T				C			C						T	C
scaffold_190	G	35832			A				G			G						A	G
scaffold_191	A	47031						G										--	G
scaffold_191	T	52748						A	A									--	A
scaffold_192	T	8293							T									--	T
scaffold_192	A	12540			A				G			G						A	G
scaffold_192	T	12555							C			C						--	C
scaffold_192	C	12566							A			A						--	A
scaffold_192	A	12846			A				G			G						A	G
scaffold_192	A	12879							G			G			A			A	G
scaffold_192	A	12911			A				G			G			A			A	G
scaffold_192	T	13068							C			C			T			T	C
scaffold_192	T	13094							C			C			T			T	C
scaffold_192	T	13123							C			C			T			T	C
scaffold_192	C	13323							A			A						--	A
scaffold_192	T	13459							T			T						--	T
scaffold_192	G	13468							G			G						--	G
scaffold_192	G	14009							T			T			G			G	T
scaffold_192	C	14562			G				C			C			G			G	C
scaffold_192	T	15068							A			A			T			T	A
scaffold_192	G	16426										A			G			G	A
scaffold_192	A	19953										A			C			C	A
scaffold_192	G	20823										G			A			A	G
scaffold_192	G	20908										G			A			A	G
scaffold_192	C	21076										C			T			T	C
scaffold_192	A	22515										G						--	G
scaffold_192	A	23435										A						--	A
scaffold_192	C	23538										C						--	C
scaffold_192	T	24471										C			T			T	C
scaffold_192	A	24684										G						--	G
scaffold_192	T	35644										T						--	T
scaffold_192	G	35929										A						--	A
scaffold_192	C	35940										T						--	T
scaffold_192	C	35958										T						--	T
scaffold_192	C	36010										T						--	T
scaffold_192	T	36024										A						--	A
scaffold_192	T	36152										G						--	G
scaffold_192	A	36173										T						--	T
scaffold_192	A	36615										T						--	T
scaffold_192	G	36727										G			A			A	G
scaffold_192	T	37096										G			T			T	G
scaffold_192	G	38398										A						--	A
scaffold_192	A	49183										T						--	T
scaffold_192	A	66941			A							T						A	T
scaffold_192	T	66946			T							G						T	G
scaffold_192	T	67010			T							A						T	A
scaffold_192	A	67040			A							G						A	G
scaffold_192	G	67081			G							T						G	T
scaffold_192	A	67086			A							T						A	T
scaffold_192	T	67100			T							C						T	C
scaffold_192	G	67834			C							G						C	G
scaffold_192	G	93851			G		A		A			A		G				G	A
scaffold_192	A	94486			G		A		A			A		G				G	A
scaffold_192	T	94947			C		T		T			T		C				C	T
scaffold_192	A	95841			A		T		T			T		A				A	T
scaffold_192	G	96194			G		A		A			A		G				G	A
scaffold_192	T	98426			A		T					T						A	T
scaffold_195	T	26714						G	G									--	G
scaffold_195	A	26804			T		A		A									T	A
scaffold_196	T	5987			T		C		C									T	C
scaffold_196	T	6044			T		C		C									T	C
scaffold_196	C	7785			T		C											T	C
scaffold_196	C	7944			C		A		A									C	A
scaffold_196	G	8198			G		T		T									G	T
scaffold_196	G	8377			G		T											G	T
scaffold_196	G	9222			A		G		G									A	G
scaffold_196	T	9237			C		T		T									C	T
scaffold_196	A	9257			C		A		A									C	A
scaffold_196	A	9872					A		A									--	A
scaffold_196	G	10001			A		G		G									A	G
scaffold_196	A	10400			A		G		G									A	G
scaffold_196	G	10627			G		A		A									G	A
scaffold_196	T	11784							A									--	A
scaffold_196	A	13206			A				G									A	G
scaffold_196	G	13392							A									--	A
scaffold_196	A	13554							G									--	G
scaffold_196	C	13840							T									--	T
scaffold_196	T	13990			T				A									T	A
scaffold_196	A	30808							A									--	A
scaffold_196	A	30814							A									--	A
scaffold_196	C	31253							T									--	T
scaffold_196	A	31562							A									--	A
scaffold_196	C	31567							C									--	C
scaffold_196	T	31782							C								T	T	C
scaffold_196	G	37704			A				G									A	G
scaffold_196	A	37732							A									--	A
scaffold_196	A	39057							G									--	G
scaffold_196	T	39483							T									--	T
scaffold_196	G	67793			A													A	--
scaffold_196	C	71940			T													T	--
scaffold_196	A	84686										G						--	G
scaffold_196	C	90611										T	T					--	T
scaffold_196	G	96619										A						--	A
scaffold_196	A	97295										A						--	A
scaffold_198	T	32248		C														C	--
scaffold_198	A	32587		G						G								--	G
scaffold_198	T	32603		G												G		G	--
scaffold_198	T	63613			T													T	--
scaffold_198	A	65669			G													G	--
scaffold_198	C	65712			A													A	--
scaffold_198	T	66000			T													T	--
scaffold_198	G	70200			A													A	--
scaffold_198	C	72405			T													T	--
scaffold_198	A	72952			A													A	--
scaffold_198	G	73272			A													A	--
scaffold_198	G	73410			G					A								G	A
scaffold_198	C	74088			C					T			T					C	T
scaffold_198	T	75043			T					G								T	G
scaffold_198	G	75132			G					A								G	A
scaffold_198	C	75293			T					C								T	C
scaffold_198	A	75685			G													G	--
scaffold_198	G	76889			T								G					T	G
scaffold_198	A	78000			T					A								T	A
scaffold_198	C	79552			A					C								A	C
scaffold_198	T	79709			C					T								C	T
scaffold_198	G	79943			G													G	--
scaffold_198	A	80524			A													A	--
scaffold_198	G	80624			G					A								G	A
scaffold_198	T	80657			T					C								T	C
scaffold_198	C	80673			C					T								C	T
scaffold_198	A	81016			A													A	--
scaffold_198	T	81045			T													T	--
scaffold_198	C	81185			T													T	--
scaffold_198	G	82062			T					G								T	G
scaffold_198	A	82140			C					A								C	A
scaffold_198	G	82163			A													A	--
scaffold_198	A	85255			T													T	--
scaffold_203	T	85887								C								--	C
scaffold_203	T	91812								T								--	T
scaffold_203	T	91900								T								--	T
scaffold_204	A	9948		G					A	G								G	A
scaffold_204	T	9958		C					T	C								C	T
scaffold_204	G	9980		A					G	A								A	G
scaffold_204	T	9986		C					T	C								C	T
scaffold_204	C	10324		T					C	T								T	C
scaffold_204	C	10350		A					C	A								A	C
scaffold_204	A	10442		G					A	G								G	A
scaffold_204	T	12981		T						T								T	--
scaffold_204	G	13874		A						A								A	--
scaffold_204	C	13934		T						T								T	--
scaffold_204	A	13974		G						G								G	--
scaffold_204	C	14149		T						T								T	--
scaffold_204	C	14853		G						G								G	--
scaffold_204	C	20361								C								--	C
scaffold_204	C	22243					C											--	C
scaffold_204	A	22877					G					A						A	G
scaffold_204	A	23165					T											--	T
scaffold_204	T	23256			C		T											C	T
scaffold_204	A	23263			T		A											T	A
scaffold_204	G	27158			G		T											G	T
scaffold_204	G	37661			A													A	--
scaffold_204	T	37808			A													A	--
scaffold_204	G	37841			A													A	--
scaffold_204	G	53784			A													A	--
scaffold_204	A	55884			A													A	--
scaffold_204	C	56813			T													T	--
scaffold_204	C	78041											T					--	T
scaffold_204	T	78108											G					--	G
scaffold_204	T	78519										A	A					--	A
scaffold_204	T	78556										C	C					--	C
scaffold_204	G	78583										A	A					--	A
scaffold_204	A	81556											T					--	T
scaffold_204	T	86743											G					--	G
scaffold_205	G	42580		A						A				G			G	G	A
scaffold_205	A	43262		C										A				A	c
scaffold_205	T	46877				C			T					T		C		C	T
scaffold_205	G	46983				A								G		A		A	G
scaffold_205	A	47104				G								G				G	--
scaffold_205	C	48008												C		T		C	T
scaffold_205	T	48730												T				T	--
scaffold_205	C	48765				C								C				C	--
scaffold_205	C	48863												C				C	--
scaffold_205	G	48941				G								G				G	--
scaffold_205	T	52770												C				C	--
scaffold_205	G	52856												G				G	--
scaffold_205	T	52865												C				C	--
scaffold_205	G	52905				G								G			G	G	--
scaffold_205	G	54397				T												T	--
scaffold_205	C	57620												C			C	C	--
scaffold_208	G	936						G	G	G	G	G				A		A	G
scaffold_209	G	13474				G	A	A				A						G	A
scaffold_209	G	13492				G		T				T						G	T
scaffold_209	C	14308				G	C	C				C						G	C
scaffold_209	A	14401				G	A	A				A						G	A
scaffold_209	G	16666					A	A				A						--	A
scaffold_209	A	22059					G	G		G		G						--	G
scaffold_209	A	22585					T	T		A		T						A	T
scaffold_209	C	42273					A		A							C		C	A
scaffold_209	G	46884					A		A									--	A
scaffold_209	A	46919					G		G			G						--	G
scaffold_209	G	46935					T		T			T						--	T
scaffold_209	G	46968					A		A			A						--	A
scaffold_209	G	46979					A		A			A						--	A
scaffold_209	A	47136					T		T									--	T
scaffold_209	C	47165					T		T									--	T
scaffold_209	A	47500					T		T									--	T
scaffold_209	A	47513					T		T									--	T
scaffold_209	A	47847							T									--	T
scaffold_209	A	48229							G	G								--	G
scaffold_209	A	48763							G									--	G
scaffold_209	A	50008							A									--	A
scaffold_209	T	52593							C									--	C
scaffold_209	A	53220							G									--	G
scaffold_209	T	53378							C									--	C
scaffold_209	T	53744							C									--	C
scaffold_209	G	54218							A									--	A
scaffold_209	G	54430							T									--	T
scaffold_209	T	54942							C									--	C
scaffold_209	T	55432							C									--	C
scaffold_209	C	56168							T									--	T
scaffold_209	T	56480							C									--	C
scaffold_209	A	72948							T									--	T
scaffold_209	T	73010							C									--	C
scaffold_209	C	74012							T									--	T
scaffold_209	C	74058							T									--	T
scaffold_209	A	74066							G									--	G
scaffold_209	G	78144							A	A								--	A
scaffold_209	T	78351							C	C								--	C
scaffold_209	T	78414							C	C								--	C
scaffold_209	G	78975							A	A								--	A
scaffold_209	T	93963						A	A	A								--	A
scaffold_209	T	94047						A	A	A								--	A
scaffold_209	T	94200						A	A	A								--	A
scaffold_210	A	23928								T								--	T
scaffold_212	T	107421												G				G	--
scaffold_212	C	107443						G						G				--	G
scaffold_212	C	107556												T				T	--
scaffold_212	C	107566												T				T	--
scaffold_212	C	107623												T				T	--
scaffold_212	C	107634												T				T	--
scaffold_212	T	107650												C				C	--
scaffold_212	C	107711												T				T	--
scaffold_212	T	107896												C				C	--
scaffold_212	C	108007												A				A	--
scaffold_212	C	108021												T				T	--
scaffold_214	C	24678	C				T							C				C	T
scaffold_214	G	25983					A											--	A
scaffold_214	C	26399					T											--	T
scaffold_214	C	27024					T											--	T
scaffold_215	T	3292				C												C	--
scaffold_215	G	43754	T															T	--
scaffold_215	T	50237										C						--	C
scaffold_215	T	52688									G							--	G
scaffold_215	T	54799					C				C							--	C
scaffold_215	C	54903					T				T							--	T
scaffold_215	T	54940					C				C							--	C
scaffold_215	C	55197									A							--	A
scaffold_215	C	55497					T				T							--	T
scaffold_217	G	26044														A		A	--
scaffold_217	G	47526	A														A	A	--
scaffold_217	A	47743	T														T	T	--
scaffold_217	C	48636	T														T	T	--
scaffold_217	A	48831															G	G	--
scaffold_217	G	49222	A														A	A	--
scaffold_217	G	58194												G				G	--
scaffold_217	G	58204												G				G	--
scaffold_217	A	65728						G						A				A	G
scaffold_217	T	86321		T														T	--
scaffold_217	T	87390		G	T													T	G
scaffold_217	G	88354		A														A	--
scaffold_217	G	88747		G														G	--
scaffold_217	G	90647		A														A	--
scaffold_217	T	91807		A														A	--
scaffold_219	A	19078											G					--	G
scaffold_219	G	22486											A					--	A
scaffold_219	G	30491			A													A	--
[truncated: 4,983 more rows]
[truncated: 3 more columns]

## Sheet: A4
scaffold	reference	position	SN03	SN09	SN19	SN02	SN11	SN12	SN20	SN21	SN22	SN24	SN26	SN14	SN16	SN27	MAT_A	MAT_B
scaffold_1	G	7354				A		A	A		A	G					A	G
scaffold_1	T	9566			C					C			C		C		C	--
scaffold_1	C	9588			T					T			T		T		T	--
scaffold_1	A	9596			G					G			G		G		G	--
scaffold_1	G	9617			A					A			A		A		A	--
scaffold_1	C	26520		C	C		T		T				T				T	C
scaffold_1	C	33542			C		T		T								T	C
scaffold_1	T	33919		G	G		T		T								T	G
scaffold_1	A	54741			A		T		T				T				T	A
scaffold_1	A	64250			A		G	G				G	G				G	A
scaffold_1	T	67383					A	A					A				A	--
scaffold_1	T	82116					C										C	--
scaffold_1	C	97269					C	C	C	C							C	--
scaffold_1	T	115618		T			A		A				A				A	T
scaffold_1	A	120897		G			A		A	A	A	A	A		A		A	G
scaffold_1	T	129809		T		G	G		G	G	G	G	G		G		G	T
scaffold_1	T	150483		T			A		A	A							A	T
scaffold_1	A	155165							G								G	--
scaffold_1	T	156774		T					C								C	T
scaffold_1	A	162541			A		C										C	A
scaffold_1	G	190914				G				G				G	G		G	--
scaffold_1	C	208272							G				G	G	G		G	--
scaffold_1	C	210426											T	T	T		T	--
scaffold_1	C	224966							A				A				A	--
scaffold_1	T	226327				A			A			A	A				A	--
scaffold_1	C	249390			T	C	T		C		T		C				C	T
scaffold_1	G	249418			A	G	A		G				G				G	A
scaffold_1	G	249439			A	G	A		G				G				G	A
scaffold_1	A	249445			T	A	T		A				A				A	T
scaffold_1	T	269556				C				C							C	--
scaffold_1	C	278467				T									T		T	--
scaffold_1	G	293909			G					T							T	G
scaffold_2	G	40355		A	A			G	G			G	G				G	A
scaffold_2	A	40414		T	T			A	A			A	A				A	T
scaffold_2	G	40422		A	A			G	G			G	G				G	A
scaffold_2	G	59242		G	G	A		A			A		A	A			A	G
scaffold_2	C	116299					C										C	--
scaffold_2	C	124933					T					T					T	--
scaffold_2	A	125468					T										T	--
scaffold_2	G	130890					A					A		A			A	--
scaffold_2	T	131155	C				T					T		T			T	C
scaffold_2	G	131271	G				A					A					A	G
scaffold_2	T	131317	T				G					G		G			G	T
scaffold_2	T	131338	T				A					A		A			A	T
scaffold_2	T	131409	T				G					G					G	T
scaffold_2	A	131420	A				C					C					C	A
scaffold_2	A	131448	A				G					G		G			G	A
scaffold_2	C	131603	C				T					T					T	C
scaffold_2	A	131699					G					G					G	--
scaffold_2	C	131771	C				T					T					T	C
scaffold_2	A	131837	A				G										G	A
scaffold_2	A	132068	A				G					G					G	A
scaffold_2	A	132115	A				G				G	G		G			G	A
scaffold_2	A	132171	A									G		G			G	A
scaffold_2	C	132508	C				A					A		A			A	C
scaffold_2	A	132608	A	A			G				G	G		G			G	A
scaffold_2	A	133100				G	G										G	--
scaffold_2	C	133128				T	T										T	--
scaffold_2	G	133151	G			A											A	G
scaffold_2	A	133471	G			A	A					A					A	G
scaffold_2	A	134621	A			G	G					G		G			G	A
scaffold_2	T	134627	T			C	C					C		C			C	T
scaffold_2	A	134666	A	A		T	T					T		T			T	A
scaffold_2	A	134746	A	A		C	C					C		C			C	A
scaffold_2	A	134761	A	A		G	G					G		G			G	A
scaffold_2	T	135166	T			C	C					C		C			C	T
scaffold_2	A	135269	A	A		T	T					T		T			T	A
scaffold_2	T	135286	T	T			A					A		A			A	T
scaffold_2	C	135296	C	C		A	A					A		A			A	C
scaffold_2	G	135378	G	G		A	A					A		A			A	G
scaffold_2	A	135507	A			T	T					T		T			T	A
scaffold_2	C	135959	C			T	T					T					T	C
scaffold_2	G	135991	G			A	A					A		A			A	G
scaffold_2	T	137048	T	T		C	C					C		C			C	T
scaffold_2	A	137085	A			C	C					C		C			C	A
scaffold_2	G	137097	G			A	A					A					A	G
scaffold_2	G	137133	G			A	A										A	G
scaffold_2	A	137247	A			G	G					G		G			G	A
scaffold_2	G	141739	G			A	A				A	A					A	G
scaffold_2	C	205647				T	T	T	T								T	--
scaffold_2	A	205693				G	G	G	G								G	--
scaffold_2	C	205891				T	T	T	T								T	--
scaffold_2	A	205969				G		G									G	--
scaffold_2	A	206841				G		G									G	--
scaffold_2	T	209482						C									C	--
scaffold_2	A	209517				G		G									G	--
scaffold_2	C	209564				T		T									T	--
scaffold_2	A	210017				G	G	G									G	--
scaffold_2	G	210025				A	A	A									A	--
scaffold_2	A	210070				G	G	G									G	--
scaffold_2	T	210208				C	C	C									C	--
scaffold_2	G	210224				A	A	A									A	--
scaffold_2	C	210312				T	T	T									T	--
scaffold_3	G	227744									G						G	--
scaffold_3	T	235770	T	T					A		A						A	T
scaffold_3	C	237483	C						T		T		T				T	C
scaffold_3	T	248347	T								C		C				C	T
scaffold_3	T	250543	T	T					C		C		C				C	T
scaffold_3	C	252148	T						C		C		C				C	T
scaffold_3	T	252288	C								T		T				T	C
scaffold_3	T	253252	T	T					C		C		C				C	T
scaffold_3	A	253591	A						G		G		G				G	A
scaffold_3	A	254249	G						A		A		A				A	G
scaffold_3	T	254770	T	T					C		C		C				C	T
scaffold_3	T	259572		T			A		A	A			A				A	T
scaffold_3	T	260631		C	C		T		T	T		T					T	C
scaffold_3	A	262830		A	A		G		G	G		G					G	A
scaffold_4	A	16965		T		T		T	T			A					T	A
scaffold_4	T	153140		T		A	A		A		A	A	A		A		A	T
scaffold_4	A	172696		T		T	T					T					T	--
scaffold_4	T	174183		T	T	C	C						C				C	T
scaffold_4	A	174777			G	A	A					A	A				A	G
scaffold_4	G	176852		G	G	A	A										A	G
scaffold_4	T	180667	T	T	T	C	C										C	T
scaffold_5	A	40634			G					G							--	G
scaffold_5	A	41854			T		A			A	A				A		A	T
scaffold_5	T	42393			T					C					C		C	T
scaffold_5	G	44168					A			A							A	--
scaffold_5	T	70280													T		T	--
scaffold_5	T	82773	A	A		T			T			T					T	A
scaffold_5	A	82824	A	A		G		G	G			G					G	A
scaffold_5	T	82959		T		C		C	C			C					C	T
scaffold_5	T	82988		T		A			A			A					A	T
scaffold_5	A	83210		A		T						T					T	A
scaffold_5	G	83419		A		G						G					G	A
scaffold_5	T	83748		T		A						A					A	T
scaffold_5	T	83775		T		C		C				C					C	T
scaffold_5	G	83848		G													--	G
scaffold_5	A	84069		G	G	A		A				A					A	G
scaffold_5	G	84132		A	A	G		G				G					G	A
scaffold_5	G	84153		A		G		G	G			G					G	A
scaffold_5	A	84528		A		T		T				T					T	A
scaffold_5	C	84571		C		T						T					T	C
scaffold_5	T	84878		C	C	T		T	T	T		T					T	C
scaffold_5	C	84893		T	T	C		C	C	C		C					C	T
scaffold_5	T	84998		T		A				A		A					A	T
scaffold_5	C	85154		C		T		T		T		T					T	C
scaffold_5	G	85238		T		G		G				G					G	T
scaffold_5	T	85738		T		A						A					A	T
scaffold_5	A	86420		A		T		T				T					T	A
scaffold_5	T	86603				C						C					C	--
scaffold_5	A	86665		A		C						C					C	A
scaffold_5	A	86716		A		T											T	A
scaffold_5	C	86731		C		A											A	C
scaffold_5	T	87000				G						G					G	--
scaffold_5	G	87020				A						A					A	--
scaffold_5	C	87102				A						A					A	--
scaffold_5	C	89515				T		T				T					T	--
scaffold_5	G	89567		G		A		A			A	A					A	G
scaffold_5	A	89700				G		G				G					G	--
scaffold_5	C	89720				T		T				T					T	--
scaffold_5	G	89931				A						A					A	--
scaffold_5	C	90430	C	C		T						T					T	C
scaffold_5	A	90510		G		A		A				A					A	G
scaffold_5	C	92363				C		C									C	--
scaffold_5	G	92594		G		G		G									G	--
scaffold_5	A	93315	A	A		G	G	G			G	G					G	A
scaffold_5	T	94568	T	T		C	C	C		C	C	C					C	T
scaffold_5	C	94602	C	C		T	T	T			T	T					T	C
scaffold_5	C	96449	C	C		T	T	T	T		T	T					T	C
scaffold_5	A	96548				A	A	A	A			A					A	--
scaffold_5	C	98506	C	C		T	T	T	T		T	T					T	C
scaffold_5	A	98557	A	A		G	G	G	G	G	G	G					G	A
scaffold_5	G	98624	G	G		A	A	A	A	A	A	A					A	G
scaffold_5	A	98653		A		G	G	G	G		G	G					G	A
scaffold_5	A	98675	A	A		G	G	G	G		G	G					G	A
scaffold_5	G	98721	G	G		A	A	A	A		A	A					A	G
scaffold_5	T	98731		T		C	C	C	C		C	C					C	T
scaffold_5	T	98752		T		G	G	G	G		G	G					G	T
scaffold_5	G	98758		G		A	A	A	A		A	A					A	G
scaffold_5	T	98779		T		C	C	C	C	C	C	C					C	T
scaffold_5	T	98831	T	T		C	C	C	C	C	C	C					C	T
scaffold_5	A	98846		A		G	G	G	G	G	G	G					G	A
scaffold_5	T	98872	T	T		C	C	C	C		C	C					C	T
scaffold_5	A	98897		A		G	G	G	G		G	G					G	A
scaffold_5	A	98904		A		G	G	G	G		G	G					G	A
scaffold_5	G	98936		G		A	A	A	A		A	A					A	G
scaffold_5	A	99039	A	A		G	G	G	G		G	G					G	A
scaffold_5	A	99055	A	A		G	G	G	G		G	G					G	A
scaffold_5	T	99115		T		G	G	G	G		G	G					G	T
scaffold_5	A	99131		A		T	T	T			T	T					T	A
scaffold_5	C	99175	C	C		T	T	T			T	T					T	C
scaffold_5	A	99199	A	A		G	G	G	G		G	G					G	A
scaffold_5	C	99215	C	C		T	T	T	T		T	T					T	C
scaffold_5	A	99426	A	A		T	T	T	T		T	T					T	A
scaffold_5	T	99439	T	T		C	C	C	C		C	C					C	T
scaffold_5	A	99466	A	A		T	T	T	T		T	T					T	A
scaffold_5	C	99504	C	C		T	T	T	T		T	T					T	C
scaffold_5	G	99525	G	G		A	A	A	A		A	A					A	G
scaffold_5	A	99589	A	A		C	C	C	C		C	C					C	A
scaffold_5	T	99607		T		C	C	C	C		C	C					C	T
scaffold_5	T	99629	T	T		A	A	A	A		A	A					A	T
scaffold_5	T	99647		T		C	C	C	C		C	C					C	T
scaffold_5	C	99673		C		T	T	T	T		T	T					T	C
scaffold_5	T	99725		T		A	A	A	A		A	A					A	T
scaffold_5	C	99795		T		C	C	C	C		C	C					C	T
scaffold_5	G	99829		A		G	G	G	G		G	G					G	A
scaffold_5	T	99985	T	T		C	C	C	C		C	C					C	T
scaffold_5	A	100004	A	A		G	G	G	G		G	G					G	A
scaffold_5	A	100040	A	A		G	G	G	G		G	G					G	A
scaffold_5	A	100058	A	A		T	T	T	T		T	T					T	A
scaffold_5	G	100087	G	G		A	A	A	A		A	A					A	G
scaffold_5	G	100105	G	G		A	A	A	A		A	A					A	G
scaffold_5	A	100153		A		G	G	G	G		G	G					G	A
scaffold_5	A	100235	A	A		G	G	G	G		G	G					G	A
scaffold_5	G	100298	G	G		A	A	A	A		A	A					A	G
scaffold_5	A	100311	A	A		G	G	G	G		G	G					G	A
scaffold_5	G	100351	G	G		A	A	A	A		A	A					A	G
scaffold_5	C	100464	C	C		T	T	T	T		T	T					T	C
scaffold_5	C	100494	C	C		T	T	T	T		T	T					T	C
scaffold_5	G	100504	G	G		T	T	T	T		T	T					T	G
scaffold_5	A	100548	A	A		C	C	C	C		C	C					C	A
scaffold_5	T	100640		T		C	C	C	C		C	C					C	T
scaffold_5	G	100658		G		A	A	A	A		A	A					A	G
scaffold_5	C	100679		C		G	G	G	G		G	G					G	C
scaffold_5	T	100686		T		C	C	C	C		C	C					C	T
scaffold_5	A	100705		A		C	C	C	C		C	C					C	A
scaffold_5	T	100735		T		C	C	C	C		C	C					C	T
scaffold_5	A	100752		A		G	G	G	G		G	G					G	A
scaffold_5	G	100823	G	G		A	A	A	A		A	A					A	G
scaffold_5	A	100861	A	A		C	C	C	C		C	C					C	A
scaffold_5	C	100893	C	C			A	A	A		A	A					A	C
scaffold_5	G	100900	G	G		A	A	A	A		A	A					A	G
scaffold_5	A	100906	A	A		G	G	G	G		G	G					G	A
scaffold_5	C	100918	C	C		T	T	T	T		T	T					T	C
scaffold_5	T	100951		T		C	C	C	C		C	C					C	T
scaffold_5	T	101077		A		T	T	T	T		T	T					T	A
scaffold_5	G	101118		A		G	G	G	G		G	G					G	A
scaffold_5	A	101125		G		A	A	A	A		A	A					A	G
scaffold_5	T	101175		T		A	A	A	A		A	A					A	T
scaffold_5	T	101181		T		C	C	C	C		C	C					C	T
scaffold_5	T	101227	A	A		T	T	T	T		T	T					T	A
scaffold_5	C	101270	A	A		C	C	C	C		C	C					C	A
scaffold_5	C	101293	T	T		C	C	C	C		C	C					C	T
scaffold_5	A	101498		G		A	A	A	A		A	A					A	G
scaffold_5	C	101623	C	C		T	T	T	T		T	T					T	C
scaffold_5	A	101731		G		A	A	A	A		A	A					A	G
scaffold_5	T	101756	T	T		C	C	C	C		C	C					C	T
scaffold_5	G	101775	G	G		T	T	T	T		T	T					T	G
scaffold_5	T	101791	T	T		C	C	C	C		C	C					C	T
scaffold_5	T	101805	T	T		G	G	G	G		G	G					G	T
scaffold_5	G	101827	G	G		A	A	A	A		A	A					A	G
scaffold_5	G	101850	G	G		A	A	A	A		A	A					A	G
scaffold_5	T	101866	T	T		G	G	G	G		G	G					G	T
scaffold_5	G	101923	G	G		A	A	A	A		A	A					A	G
scaffold_5	T	102046	T	T		C	C	C	C		C	C					C	T
scaffold_5	T	102194	C	C		T	T	T	T	T	T	T					T	C
scaffold_5	G	102226		A		G	G	G	G	G	G	G					G	A
scaffold_5	A	102254		T		A	A	A	A		A	A					A	T
scaffold_5	G	102421		G		A	A	A			A	A					A	G
scaffold_5	G	102523	G	G		T	T	T	T		T	T					T	G
scaffold_5	G	102713		A			G	G	G		G	G					G	A
scaffold_5	A	102783		A		G	G	G	G		G	G					G	A
scaffold_5	T	103344	T	T		C	C	C	C		C	C					C	T
scaffold_5	T	103429	T	T		C	C	C	C		C	C					C	T
scaffold_5	G	104246	G	G		A	A	A	A		A	A					A	G
scaffold_5	G	105290		G			T	T			T	T					T	G
scaffold_5	G	105604		G			T	T	T		T	T					T	G
scaffold_5	T	106362		T			A	A			A	A					A	T
scaffold_5	C	107386		C			A	A	A	A	A	A					A	C
scaffold_5	C	107720		T			C	C		C	C	C					C	T
scaffold_5	G	107923	G	G			C	C	C		C	C					C	G
scaffold_5	T	108033	T	T				C	C								C	T
scaffold_5	T	108713	T	T		C	C	C	C	C	C	C				C	C	T
scaffold_5	C	108771	T	T		C	C	C		C	C	C				C	C	T
scaffold_5	T	108799	C	C		T	T	T	T		T	T				T	T	C
scaffold_5	G	108914	G	G			T	T	T		T	T				T	T	G
scaffold_5	T	108941	T	T			A	A	A	A	A	A				A	A	T
scaffold_5	G	109059	A	A			G	G	G		G	G				G	G	A
scaffold_5	G	109100	A	A			G	G	G		G	G				G	G	A
scaffold_5	C	109107	T	T		C	C	C	C		C	C					C	T
scaffold_5	A	109237		G			A	A			A	A					A	G
scaffold_5	T	109252		G			T	T			T	T					T	G
scaffold_5	A	109265		G			A	A			A	A					A	G
scaffold_5	A	109343		A			G	G	G		G	G					G	A
scaffold_5	C	109375	C	C			T	T	T		T	T					T	C
scaffold_5	T	109448	C	C			T	T	T		T	T				T	T	C
scaffold_5	C	109594		A			C	C			C	C					C	A
scaffold_5	C	109618		T			C	C			C	C				C	C	T
scaffold_5	G	109633		A			G	G			G	G					G	A
scaffold_5	T	109707		C			T	T			T	T				T	T	C
scaffold_5	G	111766		A			G	G			G	G				G	G	A
scaffold_5	C	114095		C			T	T			T	T					T	C
scaffold_5	C	114194		C			T	T			T	T					T	C
scaffold_5	T	114248		T			C	C	C	C	C	C					C	T
scaffold_5	T	115671		C			T	T	T	T	T	T					T	C
scaffold_5	T	116203		T			C	C	C		C	C					C	T
scaffold_5	A	116515		A			G	G			G	G					G	A
scaffold_5	A	116951		A			T	T	T			T					T	A
scaffold_5	T	117373		T			C	C			C	C					C	T
scaffold_5	T	118354					T	T			T						T	--
scaffold_5	A	118372					A				A						A	--
scaffold_5	A	118537						A	A		A	A					A	--
scaffold_5	G	118855		G				A			A	A					A	G
scaffold_5	A	118951		G				A			A	A					A	G
scaffold_5	G	120344		G		A		A			A	A					A	G
scaffold_5	T	127256		T				C				C					C	T
scaffold_5	T	127522		C				T				T					T	C
scaffold_5	G	127666		A				G				G					G	A
scaffold_5	T	129440		T				A	A			A					A	T
scaffold_5	T	131424				T		T	T			T					T	--
scaffold_5	C	132575		C		A		A	A			A					A	C
scaffold_5	T	132584		T		A		A	A			A					A	T
scaffold_5	T	132614		T		G		G	G			G					G	T
scaffold_5	A	132686		A		T											T	A
scaffold_5	A	139723		A		G		G	G								G	A
scaffold_5	T	142705		G		T			T	T				T			T	G
scaffold_5	G	142770		T		G			G	G							G	T
scaffold_5	T	143292		T		C			C	C				C			C	T
scaffold_5	G	143738		T		G			G	G	G			G			G	T
scaffold_5	A	143754		C		A			A	A	A			A			A	C
scaffold_5	A	144111		A		G			G	G			G	G			G	A
scaffold_5	G	144147		G		C			C	C				C			C	G
scaffold_5	A	144225		T		A			A	A				A			A	T
scaffold_5	A	146268		A		G			G	G	G		G	G			G	A
scaffold_5	C	147279		C		T								T			T	C
scaffold_5	A	148047		A		T			T	T				T			T	A
scaffold_5	T	149066		T		C			C	C							C	T
scaffold_5	C	149118		C		T			T	T							T	C
scaffold_5	A	149141		A		C			C	C							C	A
scaffold_5	G	149226		G		A			A	A	A		A	A			A	G
scaffold_5	A	149249		A		G			G	G	G			G			G	A
scaffold_5	T	149293		T		C			C	C	C			C			C	T
scaffold_5	C	149537		C		T			T	T							T	C
scaffold_5	G	149623		G		A			A	A			A				A	G
scaffold_5	C	149937		C		A			A	A							A	C
scaffold_5	G	150801		G		A				A	A		A				A	G
scaffold_5	G	150806		G		A			A	A	A		A				A	G
scaffold_5	A	150838		A		G			G	G	G		G				G	A
scaffold_5	C	150855		C		T			T	T			T				T	C
scaffold_5	G	151170		G		A			A	A	A						A	G
scaffold_5	G	151198		G		A			A	A	A		A				A	G
scaffold_5	G	151235		G		A			A	A	A		A				A	G
scaffold_5	C	151275		C		T			T	T	T						T	C
scaffold_5	T	151327		T		G			G	G							G	T
scaffold_5	T	151536		T		G			G	G	G						G	T
scaffold_5	T	151547		T		C			C	C	C	C					C	T
scaffold_5	G	154228		G		A			A	A	A						A	G
scaffold_5	C	155043		T		C			C	C							C	T
scaffold_5	C	155067		T		C			C	C							C	T
scaffold_5	A	155082		G		A			A	A							A	G
scaffold_5	T	155236		T		C			C	C	C						C	T
scaffold_5	T	155315		T		A			A	A	A		A				A	T
scaffold_5	T	155321		T		A			A	A	A		A				A	T
scaffold_5	T	156627		A		T				T							T	A
scaffold_5	C	157964		C		T				T							T	C
scaffold_5	T	160561		T		C				C							C	T
scaffold_5	G	160643		G		A				A							A	G
scaffold_5	C	161861		C		T				T							T	C
scaffold_5	G	161879		G		A				A							A	G
scaffold_5	G	162020		A		G				G							G	A
scaffold_5	C	162114		A		C				C							C	A
scaffold_5	C	162179		T		C				C		C					C	T
scaffold_5	G	162388		G		A				A							A	G
scaffold_5	T	162524		T		C				C							C	T
scaffold_5	A	162851		A		T				T							T	A
scaffold_5	T	180243				A			A						A		A	--
scaffold_5	G	183509				A	A	A	A						A		A	--
scaffold_5	T	184131				C			C						C		C	--
scaffold_5	T	184386				C			C								C	--
scaffold_5	A	184888				T			T						T		T	--
scaffold_6	T	83122	T									T	T	C	T		T	C
scaffold_6	T	83132	T									T	T	C	T		T	C
scaffold_6	A	97119	G			A	A			A		A	A		A		A	G
scaffold_6	C	99155	C	C		T	T			T		T	T		T		T	C
scaffold_6	C	127497				T							T				T	--
scaffold_6	G	138500				A		A				A	A				A	--
scaffold_6	C	147193				T		T				T		T			T	--
scaffold_6	T	157577	T		T			C	C			C		C			C	T
scaffold_6	G	163810			G			A	A			A					A	G
scaffold_6	A	163864			A		T	T	T			T					T	A
scaffold_6	T	178611					C	C				C			C		C	--
scaffold_6	A	180334					A										A	--
scaffold_6	T	204294	T						C	C							C	T
scaffold_6	C	208902	C						T	T	T						T	C
scaffold_6	A	215912	G						A	A	A						A	G
scaffold_6	C	218778	C							T							T	C
scaffold_6	T	219257	G		T				G	G	G		G				G	T
scaffold_6	C	220419	T						C	C							C	T
scaffold_6	G	230565								A							A	--
scaffold_6	A	235668				G	G			G	G		G				G	--
scaffold_6	A	236617				G	G			G	G						G	--
scaffold_6	A	242368					G			G	G						G	--
scaffold_7	A	70848			C											C	--	C
scaffold_7	C	157759						A					A				A	--
scaffold_7	T	166100											C				C	--
scaffold_7	A	166260						G									G	--
scaffold_7	A	166317						G									G	--
scaffold_7	A	166347											G				G	--
scaffold_7	A	166368											G				G	--
scaffold_7	G	182906		T		T		T		T							--	--
scaffold_7	T	185096		G	G	T		T		T							T	G
scaffold_8	G	18029		T				G			G		G		G		G	T
scaffold_8	A	28992		T						A	A				A		A	T
scaffold_8	T	36520		T						C	C						C	T
scaffold_8	A	47470								C	C				C		C	--
scaffold_8	T	54086								T	T				T		T	--
scaffold_8	T	56376					A			A	A				A		A	--
scaffold_8	T	56942								C	C				C		C	--
scaffold_8	A	57718					A			A	A				A		A	--
scaffold_8	G	57865					G			G	G				G		G	--
scaffold_8	A	58110					A			A	A				A		A	--
scaffold_8	T	62864		C			T			T	T				T		T	C
scaffold_8	T	71666								A							A	--
scaffold_8	G	86080					T	T		T	T						T	--
scaffold_8	G	96956			G		T	T		T	T		T				T	G
scaffold_8	A	120232						A		A	A		A				A	--
scaffold_8	A	120842									T		T				T	--
scaffold_8	C	120913						T		T	T		T				T	--
scaffold_8	G	121504								G	G		G				G	--
scaffold_8	T	122400			T			C		C	C		C				C	T
scaffold_8	T	124075						C		C	C	C	C				C	--
scaffold_8	T	129413						G		G	G		G				G	--
scaffold_8	A	133088			T												--	T
scaffold_8	A	134472			A					C	C		C				C	A
scaffold_8	A	151206						T	T	T							T	--
scaffold_8	A	151231						G	G	G	G						G	--
scaffold_8	A	151273						G	G	G							G	--
scaffold_8	A	151287						G	G	G							G	--
scaffold_8	C	151316						T	T	T							T	--
scaffold_8	G	155235								T							T	--
scaffold_8	T	155284						C		C							C	--
scaffold_8	A	156293						G	G	G	G						G	--
scaffold_8	G	156332						C	C	C	C						C	--
scaffold_8	A	157046		A				C	C	C	C						C	A
scaffold_8	C	157052		C				T	T	T	T						T	C
scaffold_8	A	157218		G				A	A	A	A						A	G
scaffold_8	T	157294		C				T	T	T	T						T	C
scaffold_8	T	157457		T					A								A	T
scaffold_8	C	158479		T				C	C	C	C						C	T
scaffold_8	C	162359		C	C			T		T							T	C
scaffold_8	A	162364		A				G		G	G						G	A
scaffold_8	G	162379		G	G			A		A	A						A	G
scaffold_8	A	162431		A				C		C							C	A
scaffold_8	A	162448		A		G		G		G	G						G	A
scaffold_8	G	162531		G		A		A		A	A						A	G
scaffold_8	C	162549		C		T		T		T	T						T	C
scaffold_8	T	162563		T		C		C		C	C						C	T
scaffold_8	T	164534		T				C		C							C	T
scaffold_8	C	164591		C		T		T		T	T						T	C
scaffold_8	A	164682		T				A		A							A	T
scaffold_8	C	164813		T		C		C		C	C						C	T
scaffold_8	C	164925		C				A		A	A						A	C
scaffold_8	G	164933		G				T		T	T						T	G
scaffold_8	C	169666		C		T		T		T		T					T	C
scaffold_8	A	173241		A				T									T	A
scaffold_8	G	191057	G	G		C			C				C				C	G
scaffold_8	A	194934	A	A		G			G				G				G	A
scaffold_9	T	28149		T			C										C	T
scaffold_9	A	41422		A	A		C					C					C	A
scaffold_9	T	58007				T											T	--
scaffold_9	A	110725		T		A											A	T
scaffold_9	A	110731		T		A											A	T
scaffold_9	G	116436				G		G	G								G	--
scaffold_9	A	123548				T		T	T		T	T					T	--
scaffold_9	T	131923						A	A								A	--
scaffold_9	A	136981				A		A									A	--
scaffold_9	T	140541			T	C		C	C			C					C	T
scaffold_9	C	142433				T		T	T			T					T	--
scaffold_9	G	148172				G		G									G	--
scaffold_9	T	153280	T								C	C					C	T
scaffold_11	C	10161						T					T				T	--
scaffold_11	A	13648			G	G		G	G	G	G						G	--
scaffold_12	T	387			T		A	A	A			A					A	T
scaffold_12	C	3323				T	T	T	T	T	T	T	T				T	--
scaffold_12	G	3635	T				G	G	G				G		T		G	T
scaffold_12	T	15671				C	C	C	C		C	C	C				C	--
scaffold_12	A	16129				C	C	C	C		C	C	C				C	--
scaffold_12	T	18144				T		T	T		T	T	T				T	--
scaffold_12	C	19418				C		C	C	C	C	C	C				C	--
scaffold_12	C	24934					T	T	T		T	T	T				T	--
scaffold_12	G	24984					A	A	A		A	A	A				A	--
scaffold_12	C	41277					T	T	T		T	T	T				T	--
scaffold_12	T	42196					G	G	G		G		G				G	--
scaffold_12	A	45263					G	G	G		G	G	G				G	--
scaffold_12	T	72252						A					A		A		A	--
scaffold_12	T	135481		T				A					A		A		A	T
scaffold_12	T	146244		G				T					T				T	G
scaffold_12	A	149386		A	A			G			G		G				G	A
scaffold_12	G	160058				T		T			T		T				T	--
scaffold_12	A	189405		A				T									T	A
scaffold_12	G	191320		A		G		G		G	G						G	A
scaffold_12	T	191830		C		T		T		T							T	C
scaffold_12	C	197737		C				T									T	C
scaffold_12	C	198879		T				C									C	T
scaffold_12	T	200091		T				G									G	T
scaffold_12	C	210968		C				T			T						T	C
scaffold_14	C	11030			A		C			C		C	C				C	A
scaffold_14	G	36395		T	T		G		G				G	G	G		G	T
scaffold_14	A	40592		A	A		T		T			T	T	T			T	A
scaffold_14	G	93808			G				A			A					A	G
scaffold_14	T	94236			T												--	T
scaffold_14	A	116430								G	G						G	--
scaffold_14	T	120270								A	A				A		A	--
scaffold_14	A	121703							G	G	G				G		G	--
scaffold_14	T	122205							C	C	C				C		C	--
scaffold_14	A	122449								T	T				T		T	--
scaffold_14	T	122522								A	A				A		A	--
scaffold_14	A	128509									G						G	--
scaffold_14	G	128536		A		A			A	A	G						A	G
scaffold_14	G	131390					A				G	A					A	G
scaffold_14	G	131410					A				G	A					A	G
scaffold_14	G	131425									G	A					--	--
scaffold_14	G	131450									G	A					--	--
scaffold_14	C	132041														C	C	--
scaffold_15	T	3329		T	T	A			A				A		A		A	T
scaffold_15	A	15204			A	G			G								G	A
scaffold_15	C	15516			T	C			C								C	T
scaffold_15	T	15876		T	T	C			C								C	T
scaffold_15	A	20992			G	A											A	G
scaffold_15	C	21099			C	G											G	C
scaffold_15	A	33679			A	T											T	A
scaffold_15	T	38375			T	A											A	T
scaffold_15	T	38416			T	A											A	T
scaffold_15	A	38510			A	T											T	A
scaffold_15	A	39976				G											G	--
scaffold_15	G	53937				T		T	T					T			T	--
scaffold_15	C	55084				C	C	C	C			C		C			C	--
scaffold_15	G	56226				T		T	T					T			T	--
scaffold_15	A	78301		A				C		C		C	C				C	A
scaffold_15	A	81613		G				A		A			A				A	G
scaffold_15	T	81698		G				T		T			T				T	G
scaffold_15	T	81744		A				T		T			T				T	A
scaffold_15	C	81809						C					C				C	--
scaffold_15	G	86373		G				T				T	T				T	G
scaffold_15	A	86493						T		T		T	T				T	--
scaffold_15	T	86639						C		C							C	--
scaffold_15	A	88960										T					T	--
scaffold_15	A	92946				G		G				G					G	--
scaffold_15	T	93069				T		T				T					T	--
scaffold_15	A	93080				A		A				A					A	--
scaffold_15	G	94327				T											T	--
scaffold_15	G	94834				A		A				A					A	--
scaffold_15	T	94840				A						A					A	--
scaffold_15	T	95152				A		A				A					A	--
scaffold_15	G	95186				A		A									A	--
scaffold_15	C	95343				A		A				A					A	--
scaffold_15	A	95557				G		G				G					G	--
scaffold_15	C	95631				T		T				T					T	--
scaffold_15	T	95686		T		C		C				C					C	T
scaffold_15	A	97358				G		G				G					G	--
scaffold_15	A	97552				G		G				G					G	--
scaffold_15	C	103544			C	T		T									T	C
scaffold_15	A	103758			A	T		T									T	A
scaffold_15	T	104022				C		C									C	--
scaffold_15	G	104780				G		G									G	--
scaffold_15	C	104791				C		C									C	--
scaffold_15	A	105825				G		G									G	--
scaffold_15	G	106319			G	A		A									A	G
scaffold_15	G	106656				G		G									G	--
scaffold_15	T	107280				T		T									T	--
scaffold_15	C	107435				A		A									A	--
scaffold_15	T	107485				C		C									C	--
scaffold_15	G	107554				A		A									A	--
scaffold_15	T	107621				A		A									A	--
scaffold_15	T	107628				C		C									C	--
scaffold_15	G	107714				G		G									G	--
scaffold_15	A	108202				T		T									T	--
scaffold_15	G	108267				A		A									A	--
scaffold_15	T	108273				A		A									A	--
scaffold_15	T	108341				C		C									C	--
scaffold_15	C	109065			A	C		C									C	A
scaffold_15	T	109354				C		C									C	--
scaffold_15	T	109862			C	T		T									T	C
scaffold_15	A	110124			G	A		A									A	G
scaffold_15	T	110969			T	A		A							A		A	T
scaffold_15	A	111346			G	A		A									A	G
scaffold_15	G	111557			G	A		A									A	G
scaffold_15	G	112115				T		T									T	--
scaffold_15	G	112734			G	A		A									A	G
scaffold_15	T	113568			T	A		A									A	T
scaffold_15	T	113846			T	A		A									A	T
scaffold_15	T	114407			T	A		A									A	T
scaffold_15	T	117149			T	A		A									A	T
scaffold_15	A	117679			A	G		G									G	A
scaffold_15	T	117709			T	G		G									G	T
scaffold_15	G	117970			G	A		A									A	G
scaffold_15	A	118008			A	C		C									C	A
scaffold_15	C	118053			C	T		T									T	C
scaffold_15	T	119715			T	C		C					C				C	T
scaffold_15	A	119853			G	A		A									A	G
scaffold_15	T	120843			A	T		T									T	A
scaffold_15	A	121329			A	G		G									G	A
scaffold_15	G	121576			G	A											A	G
scaffold_15	G	121597			G	A		A									A	G
scaffold_15	A	122937			A	G		G									G	A
scaffold_15	G	123360			G	T		T									T	G
scaffold_15	G	124557			G	A		A									A	G
scaffold_15	C	125324			C	T		T		T		T					T	C
scaffold_15	T	125391			T	C		C		C							C	T
scaffold_15	A	126251			A	C		C									C	A
scaffold_15	T	128134			C	T		T					T				T	C
scaffold_15	A	129190			G	A		A					A				A	G
scaffold_15	T	129196			C	T		T					T				T	C
scaffold_15	G	129203			A	G		G					G				G	A
scaffold_15	C	129820			C	A		A					A				A	C
scaffold_15	A	130344			A	G		G					G				G	A
scaffold_15	C	131205			C			T					T				T	C
scaffold_16	C	13654		T		C				C			C		C	C	C	T
scaffold_16	A	13873				G				G					G	G	G	--
scaffold_16	A	14129		G						A	A	A			A	A	A	G
scaffold_16	C	14215		T		C				C		C	C		C	C	C	T
scaffold_16	G	14608				G				G			G		G	G	G	--
scaffold_16	A	14640				A				A			A		A	A	A	--
scaffold_16	G	104606	A			A			A		A						A	--
scaffold_16	A	139660								C							C	--
scaffold_17	T	9679	T		T				C	C							C	T
scaffold_17	T	14670	C		C				T								T	C
scaffold_17	G	21977	G			T			G					T			T	G
scaffold_17	G	21999	G			A			G		A			A			A	G
scaffold_17	G	22011	G			A			G					A			A	G
scaffold_17	C	28655					A			A				A	A	A	A	--
scaffold_17	A	34541							G	G				G			G	--
scaffold_17	G	41845							T	T							T	--
scaffold_17	G	42389		A					A	A							A	--
scaffold_17	C	48058							T			T		T			T	--
scaffold_17	T	64647		T			A							A		A	A	T
scaffold_17	A	65027		A			G					G		G		G	G	A
scaffold_17	G	80851		G			T	T			T	T		T	T	T	T	G
scaffold_17	G	82791		G	G		A	A			A	A			A	A	A	G
scaffold_17	A	89933		A			T	T		T		T					T	A
scaffold_17	T	92972		T			C	C		C		C			C		C	T
scaffold_17	A	96053					C			C							C	--
scaffold_17	A	110065		A			G	G					G				G	A
scaffold_17	T	114409		T		C		C					C				C	T
scaffold_17	C	114667		T				C					C				C	T
scaffold_17	T	114902		C				T		T			T				T	C
scaffold_17	G	115122		G				A					A				A	G
scaffold_17	A	115917		A				G					G				G	A
scaffold_17	A	116314		A				G					G				G	A
scaffold_17	T	119494		T									C				C	T
scaffold_17	G	119951		G									A				A	G
scaffold_17	G	121203		G									A				A	G
scaffold_17	G	121602		G									A				A	G
scaffold_17	G	122756		G			T						T				T	G
scaffold_17	A	125706		G	G		A	A					A				A	G
scaffold_17	T	126781		T	T		C	C					C				C	T
scaffold_18	T	35823						A	A	A	A		A		A		A	--
scaffold_18	C	42298		T		C		C		C	C		C		C		C	T
scaffold_18	T	88873											G				G	--
scaffold_18	A	105680				G			G	G	G	G	G	G			G	--
scaffold_18	G	105766				A			A	A		A	A	A	A		A	--
scaffold_18	A	105805				G			G	G	G	G	G	G	G		G	--
scaffold_18	C	105895				A	A		A	A	A	A	A	A			A	--
scaffold_18	G	106211				A	A			A		A	A	A	A		A	--
scaffold_18	C	106270				T	T			T	T	T	T	T			T	--
scaffold_18	C	106425				T	T			T	T	T	T	T	T		T	--
scaffold_18	A	106447				G				G	G	G	G	G	G		G	--
scaffold_18	T	106468				C	C		C	C	C	C	C	C			C	--
scaffold_18	A	106500				G	G		G	G	G	G	G	G	G		G	--
scaffold_18	C	106507				T	T		T	T	T	T	T	T	T		T	--
scaffold_18	T	106832				C	C		C	C	C	C	C	C			C	--
scaffold_18	A	106867				G	G		G	G	G	G	G	G			G	--
scaffold_18	T	106951				T	T			T	T	T	T	T			T	--
scaffold_18	T	106969			G	T	T		T	T	T	T	T	T			T	G
scaffold_18	T	107172			G	T	T			T	T	T	T	T			T	G
scaffold_18	T	107455			C	T	T			T	T	T	T	T			T	C
scaffold_18	T	107490			C	T	T			T	T	T	T	T			T	C
scaffold_18	T	107500			C	T	T			T	T	T	T	T			T	C
scaffold_18	G	107571			G	A	A			A	A	A	A	A	A		A	G
scaffold_18	C	107629			C	T	T			T	T	T	T	T			T	C
scaffold_18	C	107731				C	C			C	C	C	C	C			C	--
scaffold_18	G	107958			G	C	C			C	C	C	C	C			C	G
scaffold_18	G	107994			G	A	A			A	A	A	A	A			A	G
scaffold_18	T	108106				C	C			C	C	C	C	C			C	--
scaffold_18	C	108834					C			C	C	C	C	C			C	--
scaffold_18	C	108884				C	C			C	C	C	C	C	C		C	--
scaffold_18	T	108907					T			T	T	T	T	T	T		T	--
scaffold_18	T	111441					T			T		T	T	T			T	--
scaffold_18	T	114730				T			T	T		T	T	T	T		T	--
scaffold_18	G	119991				A				A		A	A		A		A	--
scaffold_18	G	120590				A				A			A				A	--
scaffold_18	A	125116				G											G	--
scaffold_18	G	140620			G	A	A						A				A	G
scaffold_19	G	7215				A			G	G							G	A
scaffold_19	G	7233				A			G	G							G	A
scaffold_19	A	7497		A		C	A		A								A	C
scaffold_19	A	7529				G	A		A								A	G
scaffold_19	C	7557				T			C		C						C	T
scaffold_19	T	7782		T		C			T								C	T
scaffold_19	G	7787		G		A			G								A	G
scaffold_19	C	7870	C	C	C	T			C	C							T	C
scaffold_19	A	7891	A	A	A	C			A	A							C	A
scaffold_19	T	7902		T	T	C			T	T							C	T
scaffold_19	G	7920			G	A			G	G							A	G
scaffold_19	T	7939				C			T	T							T	C
scaffold_19	T	8027				C			T	T							T	C
scaffold_19	A	48641		C		C		C									C	--
scaffold_19	T	134643		T			C	C	C			C					C	T
scaffold_19	C	194275		T			C		C				C			C	C	T
scaffold_19	T	232111	C	C								T					T	C
scaffold_19	C	233356	T	T								C					C	T
scaffold_19	C	233397	G	G								C					C	G
scaffold_19	G	233604	G	G								A					A	G
scaffold_19	C	233617	C	C								T					T	C
scaffold_19	A	233669	A	A								T					T	A
scaffold_19	T	233703	T	T													--	T
scaffold_19	T	233727	T	T					C								C	T
scaffold_19	A	234076	A	A					G		G						G	A
scaffold_19	A	234128	A	A								G					G	A
scaffold_19	C	234140	C	C								T					T	C
scaffold_19	T	234152	T	T							A	A					A	T
scaffold_19	T	234187	T	T					C		C	C					C	T
scaffold_19	T	234242	T	T					C	C	C						C	T
scaffold_19	A	234255	A	A													--	A
scaffold_19	A	234289	A	A					T		T						T	A
scaffold_19	C	234384	C	C					T	T	T						T	C
scaffold_19	A	234426	A	A					G								G	A
scaffold_19	T	234572	T	T					A	A	A						A	T
scaffold_19	G	234614	G	G					A	A	A						A	G
scaffold_19	C	234699	C	C					T		T						T	C
scaffold_19	A	234707	A	A					G		G						G	A
scaffold_19	G	235303	G	G							A						A	G
scaffold_19	G	235345	G	G					A	A	A						A	G
scaffold_19	G	238836		G						A	A						A	G
scaffold_19	G	238849		G						A	A						A	G
scaffold_19	T	238938		C					T	T	T						T	C
scaffold_19	T	239598		T	T					G	G		G				G	T
scaffold_19	T	239706		A	A					T	T						T	A
scaffold_19	A	240110		A	A					G	G						G	A
scaffold_20	T	5451												A			A	--
scaffold_20	T	5674		C			C		C								C	--
scaffold_20	C	6331		A				A					A	A			A	--
scaffold_20	A	9267						T					T	T			T	--
scaffold_20	A	26916				G	G		G				G				G	--
scaffold_20	A	49365					G		G			G	G				G	--
scaffold_20	A	77968						T				T	T				T	--
scaffold_20	G	94440			G		A	G	G		G						G	A
scaffold_20	C	94458			C		T	C	C								C	T
scaffold_20	T	121277			C				T			T					T	C
scaffold_20	T	158261	A	A			A	A				A					A	--
scaffold_21	T	14975										T					T	--
scaffold_21	T	15813										C					C	--
scaffold_21	T	15894										C					C	--
scaffold_21	C	15966										T					T	--
scaffold_21	A	15976										C					C	--
scaffold_21	T	16082										A					A	--
scaffold_21	T	16101										C					C	--
scaffold_21	T	16123										C					C	--
scaffold_21	C	16134										T					T	--
scaffold_21	G	16154										A					A	--
scaffold_21	C	16650										T					T	--
scaffold_21	A	16677										C					C	--
scaffold_21	G	16789										A					A	--
scaffold_21	G	17002										A					A	--
scaffold_21	G	17373										A					A	--
scaffold_21	G	17520										T					T	--
scaffold_21	A	17684										G					G	--
scaffold_21	A	17701										G					G	--
scaffold_21	G	17709										A					A	--
scaffold_21	C	17774										G					G	--
scaffold_21	T	18061										C	C				C	--
scaffold_21	C	23130										T					T	--
scaffold_21	T	23191										C	C				C	--
scaffold_21	G	23578										A	A				A	--
scaffold_21	A	23646					G					G	G				G	--
scaffold_21	A	23723										T	T				T	--
scaffold_21	T	25471										A					A	--
scaffold_21	A	25486										T					T	--
scaffold_21	C	25576					A					A	A				A	--
scaffold_21	C	25943										T	T				T	--
scaffold_21	A	26006										G	G				G	--
scaffold_21	A	26039										G	G				G	--
scaffold_21	T	26349										A					A	--
scaffold_21	T	29754					C					C	C				C	--
scaffold_21	A	29967					G					G	G				G	--
scaffold_21	A	30008					C					C	C				C	--
scaffold_21	C	30087					T					T	T				T	--
scaffold_21	G	46199					A					A	A				A	--
scaffold_21	C	51762					T					T	T		T		T	--
scaffold_21	C	51956					T					T	T		T		T	--
scaffold_21	T	52456					G					G	G				G	--
scaffold_21	A	61135					C					C	C				C	--
scaffold_21	C	116205			A		A		A			A					A	--
scaffold_22	A	574			A			G		G							G	A
scaffold_22	A	4435		A			G										G	A
scaffold_22	C	18073	C	C													--	C
scaffold_22	T	120563		T	T	C		C		C	C	C	C				C	T
scaffold_22	A	120648		G	G	A				A	A	A	A				A	G
scaffold_22	A	120661		T	T	A		A		A	A	A	A				A	T
scaffold_22	C	121339		T	T	C		C		C	C	C	C				C	T
scaffold_22	G	121742		A	A	G		G	G	G	G	G	G				G	A
scaffold_22	C	129942		T	T	C		C	C	C	C	C	C				C	T
scaffold_22	A	133516				A			A	A	A	A	A				A	--
scaffold_22	A	134034			G	A		A	A	A	A	A	A				A	G
scaffold_22	T	135294			A	T		T	T	T	T	T	T				T	A
scaffold_22	C	135460			C	T		T	T	T	T	T	T				T	C
scaffold_22	T	135534			T	C		C	C	C	C	C	C				C	T
scaffold_22	T	135695			T			C	C	C	C	C	C				C	T
scaffold_22	G	135735			G	A		A	A	A	A	A	A				A	G
scaffold_22	A	135808			A	G		G	G	G	G	G	G				G	A
scaffold_22	G	136642			G	A			A	A		A	A				A	G
scaffold_22	G	136709	G		G	A			A	A	A		A				A	G
scaffold_22	G	136778	G		G	A			A	A	A	A	A				A	G
scaffold_22	C	137789	C		C	T		T	T	T	T	T	T				T	C
scaffold_22	G	139283	A														--	A
scaffold_22	A	139296				A			A	A	A	A	A				A	--
scaffold_23	C	32612						C	C	C							C	--
scaffold_23	C	32630		T				C		C			C				C	T
scaffold_23	T	106907		T	T	A			A			A	A		A		A	T
scaffold_23	A	106935		A	A								T		T		T	A
scaffold_23	A	108135		A	A	C		C	C			C	C				C	A
scaffold_23	C	108236		C	C	T		T	T						T		T	C
scaffold_23	A	108262		A	A	T		T	T			T	T		T		T	A
scaffold_23	T	108727		T	T	A		A	A	A		A	A				A	T
scaffold_23	G	117656						G				G		A			G	A
scaffold_24	G	55979				A							A		A		A	--
scaffold_24	A	64703				C	C	C			C		C	C	C		C	--
scaffold_25	T	2885			C			T	T	T			T				T	C
scaffold_25	C	3124		T	T	C		C	C	C			C				C	T
scaffold_25	G	3308		G	G	A		A	A	A			A				A	G
scaffold_25	T	4790		C	C	T		T	T	T			T				T	C
scaffold_25	G	6593		G	G			A	A	A			A				A	G
scaffold_25	A	7478		G	G	A		A	A	A			A				A	G
scaffold_25	G	8737		G	G	T		T	T	T			T				T	G
scaffold_25	T	8755		T	T	C		C	C	C			C				C	T
scaffold_25	A	9540		T	T	A		A	A	A			A				A	T
scaffold_25	C	12274		T	T	C		C	C	C			C				C	T
scaffold_25	C	12790		C	C			T	T				T				T	C
scaffold_25	A	13375				G		G	G	G	G		G				G	--
scaffold_25	C	13820		C		T		T	T	T			T				T	C
scaffold_25	G	13930		A		G		G	G	G	G		G				G	A
scaffold_25	T	14447		T		A		A	A	A	A		A				A	T
scaffold_25	C	14502		C		T		T	T	T	T		T				T	C
scaffold_25	G	14511		G		T			T	T	T		T				T	G
scaffold_25	A	14558		A		G		G	G	G	G		G				G	A
scaffold_25	A	14739		A		G		G	G	G	G		G				G	A
scaffold_25	T	14985		T				C	C	C	C		C				C	T
scaffold_25	G	15015		G		A		A	A	A	A		A				A	G
scaffold_25	C	15671		T		C		C	C	C	C		C				C	T
scaffold_25	C	15837		C				T	T	T	T		T				T	C
scaffold_25	A	16737						A	A		A		A				A	--
scaffold_25	G	17643							A	A	A		A				A	--
scaffold_25	A	20361						G	G	G	G		G				G	--
scaffold_25	C	39662						T	T	T	T	T	T	T			T	--
scaffold_25	C	45327						T	T	T	T	T	T	T			T	--
scaffold_25	C	48553						C									C	--
scaffold_25	T	51304						C									C	--
scaffold_25	A	64218						G									G	--
scaffold_25	T	73832						C					C				C	--
scaffold_25	C	73979						T									T	--
scaffold_25	A	78223				G		G	G								G	--
scaffold_25	G	89923											A				A	--
scaffold_25	T	108173		T	T		A						A				A	T
scaffold_25	G	108343			G		A										A	G
scaffold_25	A	110171		A	A		T										T	A
scaffold_26	T	16673		T					A			A					A	T
scaffold_26	A	26421										T					T	--
scaffold_26	T	34010		G						T		T	T				T	G
scaffold_26	T	48979		T						C		C					C	T
scaffold_26	G	49193		A						G		G					G	A
scaffold_26	G	49279		G	G		A			A		A					A	G
scaffold_26	G	49353		G	G					A		A					A	G
scaffold_26	C	49566		C						T		T					T	C
scaffold_26	A	50955		A						G		G					G	A
scaffold_26	T	52221		C	C					T		T					T	C
scaffold_27	T	24496			T					G	G						G	T
scaffold_27	G	72405							A								A	--
scaffold_27	T	73024						A	A				A		A		A	--
scaffold_27	A	73509							T				T				T	--
scaffold_27	A	74193							T				T				T	--
scaffold_27	T	84860											G				G	--
scaffold_27	A	84971											G				G	--
scaffold_27	C	85560											T				T	--
scaffold_27	T	85705											C				C	--
scaffold_27	A	86611											G				G	--
scaffold_27	A	93488		A						A							A	--
scaffold_27	A	94490									G						G	--
scaffold_27	A	96585									G						G	--
scaffold_27	G	97093									A						A	--
scaffold_27	G	104682		G			T										T	G
scaffold_27	A	109658									A						A	--
scaffold_27	G	110698				A							A				A	--
scaffold_27	A	117804						G			G						G	--
scaffold_27	A	117864						G			G						G	--
scaffold_27	A	118303									G						G	--
scaffold_27	A	118343									G		G				G	--
scaffold_27	C	126707		T							C						C	T
scaffold_28	G	8046				A		A	A				A				A	--
scaffold_28	C	38523				A		A					A				A	--
scaffold_28	C	38770				T		T		T			T				T	--
scaffold_28	T	38832				T		T		T			T				T	--
scaffold_28	G	41013				A		A		A			A				A	--
scaffold_28	G	49643	A			A				A			A	A	A		A	--
scaffold_28	T	51419				A				A			A	A	A		A	--
scaffold_28	A	54253			T					A		T	A	A	A		A	T
scaffold_28	A	54259			G					A		G	A	A	A		A	G
scaffold_28	G	54265			T					G		T	G	G	G		G	T
scaffold_28	G	54271			T					G		T	G	G	G		G	T
scaffold_28	C	55028				A							A	A	A		A	--
scaffold_28	C	58767				T				T			T				T	--
scaffold_28	G	60800				A			A	A	A		A	A	A		A	--
scaffold_28	C	81011			C	T			T		T	T	T				T	C
scaffold_28	A	82783			A	T			T		T	T	T				T	A
scaffold_28	A	91016			T				A		A						A	T
scaffold_28	C	91764			C	T			T		T		T				T	C
scaffold_29	A	17686		A		T	T		T	T	T						T	A
scaffold_29	C	69109					A				C	A	A	C	C	A	A	C
scaffold_30	T	35266		A		A			A		A				A		A	--
scaffold_31	G	764			G	G	G		G	G			G				G	--
scaffold_31	G	770			G	A	A		A	A			A				A	G
scaffold_31	C	782			C	C	C		C	C			C				C	--
scaffold_31	G	798			G	A	A		A	A			A				A	G
scaffold_31	G	883		G		A	A		A	A			A				A	G
scaffold_31	C	959			C	T	T		T	T			T				T	C
scaffold_31	C	976			C	T	T		T	T			T				T	C
scaffold_31	C	1106			T	C	C		C	C			C				C	T
scaffold_31	A	1844	A				A		A	A					A		A	--
scaffold_31	C	1880	T				C		C	C			C		C		C	T
scaffold_31	C	3347	T				C		C	C	C				C		C	T
scaffold_31	A	4349	A	A			T		T	T	T		T		T		T	A
scaffold_31	A	10528	A				C		C		C	C	C		C		C	A
scaffold_31	T	74114			C				T		C					C	T	C
scaffold_31	C	124696	T	T													--	T
scaffold_31	G	132141	G	G													--	G
scaffold_31	A	139446		A	A	G	G	G					G				G	A
scaffold_31	T	144870	T	T		C	C			C							C	T
scaffold_31	A	145221	A	A	A	T	T	T		T							T	A
scaffold_31	A	147048	A	A		C	C			C							C	A
scaffold_31	G	151536	G	G		G			A	G			A				G	A
scaffold_31	A	151554	A	A		A				A			G				A	G
scaffold_31	T	158023	A	A		A				A			A				A	--
scaffold_32	A	16638							G	G							G	--
scaffold_32	G	16647							T	T							T	--
scaffold_32	C	17828		C			T		T	T	T						T	C
scaffold_32	A	20509		G			G		G		G						G	--
scaffold_33	G	35366	G	G		A	A	A			A		A				A	G
scaffold_33	C	40912		T			C	C			C	C	C				C	T
scaffold_33	C	48743					C	C					C				C	--
scaffold_33	G	54766	G		G		T	T					T		T		T	G
scaffold_33	G	54909	G		G		A	A			A	A	A		A		A	G
scaffold_33	A	60115	G		G		A	A				A					A	G
scaffold_33	G	60296	G		G		A	A									A	G
scaffold_33	A	60319	A		A		T	T									T	A
scaffold_33	T	61174	T		T		C	C									C	T
scaffold_33	T	64566	T		T		C	C									C	T
scaffold_33	A	65806	A		A		G	G									G	A
scaffold_33	G	66474	G			A	A	A									A	G
scaffold_33	A	67554	A				T	T									T	A
scaffold_33	C	68787	T			C	C	C									C	T
scaffold_33	T	69827	C		C	T	T	T									T	C
scaffold_33	T	72317					T	T									T	--
scaffold_33	T	76075			T			C					C				C	T
scaffold_33	A	76527			A			G					G				G	A
scaffold_33	G	77195			G								C				C	G
scaffold_33	A	78471			A								G				G	A
scaffold_33	G	78584			G								A				A	G
scaffold_33	C	79060			T								C				C	T
scaffold_33	G	79128			A								G				G	A
scaffold_33	C	81176			C		T						T				T	C
scaffold_33	G	82305			G								A				A	G
scaffold_33	A	82497			A								T				T	A
scaffold_33	A	82845			G								A				A	G
scaffold_33	A	83255											T				T	--
scaffold_33	C	84963			C		T				T		T				T	C
scaffold_33	T	86655			T		C				C		C				C	T
scaffold_33	A	87643			A		T			T	T		T				T	A
scaffold_33	A	88689			G		A						A				A	G
scaffold_33	G	88741			A		G						G				G	A
scaffold_33	A	88857			A		T						T				T	A
scaffold_33	C	89372			C		T			T	T		T				T	C
scaffold_33	A	90238			A		G				G		G				G	A
scaffold_33	C	90440			T		C						C				C	T
scaffold_33	A	91787			G		A						A				A	G
scaffold_33	A	92843			G		A						A				A	G
scaffold_33	A	93456			A		G				G		G				G	A
scaffold_33	T	96739			T		C				C		C				C	T
scaffold_33	G	96832			A		G				G	G	G				G	A
scaffold_33	T	96924			T		A						A				A	T
scaffold_33	A	96948			A		T				T		T				T	A
scaffold_33	G	98139			A		G				G		G				G	A
scaffold_33	A	98993					A						A				A	--
scaffold_33	G	99129			C		G				G		G				G	C
scaffold_33	C	99998			T		C						C				C	T
scaffold_33	G	100284					A						A				A	--
scaffold_33	T	100293			T		C										C	T
scaffold_33	T	102215			C		T				T	T	T				T	C
scaffold_33	G	102420			G		C						C				C	G
scaffold_33	A	103137			A		G				G		G				G	A
scaffold_33	G	103597					A										A	--
scaffold_33	T	104094					C										C	--
scaffold_33	C	104226					T										T	--
scaffold_33	T	104528					A										A	--
scaffold_33	T	104664					C										C	--
scaffold_33	C	104721					T										T	--
scaffold_33	T	104755					C										C	--
scaffold_33	T	104969			T		C										C	T
scaffold_33	A	105009					C										C	--
scaffold_33	C	105214					A										A	--
scaffold_33	C	106203					T										T	--
scaffold_33	G	106210					T										T	--
scaffold_33	G	106340					A										A	--
scaffold_33	G	107833					A										A	--
scaffold_33	T	107967					C					C		C			C	--
scaffold_33	T	107976					C					C		C			C	--
scaffold_33	C	108125					C							C			C	--
scaffold_33	C	109742					T										T	--
scaffold_33	T	110881					C				C	C		C			C	--
scaffold_33	A	111092										G		G			G	--
scaffold_33	A	111522					A							A			A	--
scaffold_33	G	111757						G						G			G	--
scaffold_33	C	111817												T			T	--
scaffold_34	C	28861					T			T					T		T	--
scaffold_34	A	28937					G			G					G		G	--
scaffold_34	T	29378					C			C					C		C	--
scaffold_34	T	30786					C			C					C		C	--
scaffold_34	T	30822					C			C	C				C		C	--
scaffold_34	T	30894					C			C	C				C		C	--
scaffold_34	T	33092					C			C	C				C		C	--
scaffold_34	C	55798				T	T			T							T	--
scaffold_34	A	63520				G	G			G							G	--
scaffold_34	G	67759				T			T	T							T	--
scaffold_34	T	67767				C			C	C			C				C	--
scaffold_34	C	67790				T			T	T			T				T	--
scaffold_34	T	70289						T		T			T				T	--
scaffold_34	G	74252				T				T			T		T		T	--
scaffold_34	G	74595			T	G		G		G			G		G		G	T
scaffold_34	T	75363			C	T		T		T			T		T		T	C
scaffold_34	G	75541			G	A				A			A		A		A	G
scaffold_34	C	77280		T	T	C				C			C		C		C	T
scaffold_34	G	78488		A	A	G		G		G			G		G		G	A
scaffold_34	T	79272		T	T	C		C		C			C	C	C		C	T
scaffold_34	A	81300		T	T	A		A		A			A	A	A		A	T
scaffold_34	C	81400		C	C	A				A			A	A	A		A	C
scaffold_34	G	81415		G	G	A							A	A	A		A	G
scaffold_34	T	81448		T	T	G		G		G			G	G	G		G	T
scaffold_34	G	81855		A	A	G		G		G			G	G	G		G	A
scaffold_34	T	81889		C	C	T		T		T	T		T	T	T		T	C
scaffold_34	G	82233		T	T	G		G		G			G	G	G		G	T
scaffold_34	A	82267		G	G	A				A			A	A	A		A	G
scaffold_34	A	83140		C	C	A				A				A			A	C
scaffold_34	T	84169		T	T	A		A		A			A	A	A		A	T
scaffold_34	T	85415		T	T	C				C			C	C	C		C	T
scaffold_34	A	85445		A	A	G				G			G	G	G		G	A
scaffold_34	T	85515		C	C	T				T			T	T	T		T	C
scaffold_34	C	86225		C	C	T			T	T			T	T	T		T	C
scaffold_34	T	86249		T	T	C			C	C			C	C	C		C	T
scaffold_34	A	86493		G	G	A		A	A	A			A	A	A		A	G
scaffold_34	C	86546		T	T	C		C	C	C			C	C	C		C	T
scaffold_34	A	86597		T	T	A		A	A	A			A	A	A		A	T
scaffold_34	T	86646		C	C	T			T	T			T	T	T		T	C
scaffold_34	T	87206				T			T				T	T			T	--
scaffold_34	T	87392		T	T	A			A	A			A	A			A	T
scaffold_34	T	87548		T	T	C			C	C			C	C			C	T
scaffold_34	G	90731		G	G				A	A			A	A			A	G
scaffold_34	A	91323		C	C	A		A	A	A			A	A			A	C
scaffold_34	T	91644		T	T				A	A				A			A	T
scaffold_34	G	92132		G	G	A			A	A			A	A			A	G
scaffold_34	C	92403		C	C	G			G	G			G	G			G	C
scaffold_34	G	92586			G	A			A	A			A	A	A		A	G
scaffold_34	T	92676			T	C			C	C			C	C			C	T
scaffold_34	A	93033		A	A	C			C	C		C	C	C			C	A
scaffold_34	C	94119		T	T	C			C	C			C	C			C	T
scaffold_34	A	94141		G	G	A			A	A			A	A			A	G
scaffold_34	C	94209			T	C			C	C		C	C	C			C	T
scaffold_34	A	94483		A	A	C			C	C			C	C			C	A
scaffold_34	A	94689		A	A	T			T								T	A
scaffold_34	T	94718		T	T				C	C			C	C			C	T
scaffold_34	G	98776		G	G				T	T			T				T	G
scaffold_34	A	98932		G	G				A	A			A				A	G
scaffold_34	C	98984		C	C				T	T							T	C
scaffold_34	G	99969		G	G				A	A			A				A	G
scaffold_34	A	102737		A	A				G	G			G				G	A
scaffold_34	G	104448		G	G	A			A	A		A	A			A	A	G
scaffold_34	G	104854		A	A				G	G	G		G			G	G	A
scaffold_34	C	105411		C	C				T	T			T			T	T	C
scaffold_34	G	105600		A	A				G	G	G	G	G			G	G	A
scaffold_34	T	105760		T	T	C			C	C	C		C			C	C	T
scaffold_34	A	107975		A	A	T			T	T			T			T	T	A
scaffold_34	G	108088		G	G	A			A	A	A	A	A			A	A	G
scaffold_34	C	108560		C	C	T			T	T	T	T	T			T	T	C
scaffold_34	A	108805		G	G	A			A	A	A		A			A	A	G
scaffold_34	C	109568		C	C	T			T	T		T	T			T	T	C
scaffold_34	A	109604		A	A	G			G	G		G	G			G	G	A
scaffold_34	T	109618		T	T	C			C	C		C	C			C	C	T
scaffold_34	G	109722		A					G	G		G	G			G	G	A
scaffold_34	G	109864		G	G				A	A			A			A	A	G
scaffold_34	C	109970			C											T	T	C
scaffold_34	A	110009		A	A												--	A
scaffold_34	C	110983		T	T	C			C	C			C			C	C	T
scaffold_34	T	111417		T					G	G						G	G	T
scaffold_34	A	112590		A					T	T			T				T	A
scaffold_34	C	170562		C		A			A		A						A	C
scaffold_34	T	173235		T		C			C		C						C	T
scaffold_34	C	173675		C		T					T						T	C
scaffold_34	C	173824		C		T			T		T						T	C
scaffold_34	A	173991		G		A			A		A						A	G
scaffold_34	G	174036		A		G			G		G						G	A
scaffold_34	T	174196		A					T		T	T					T	A
scaffold_34	T	174221		A					T		T						T	A
scaffold_34	G	174273		A							G						G	A
scaffold_34	C	174450		T					C		C						C	T
scaffold_34	A	174475		G					A		A						A	G
scaffold_34	C	174789		T					C		C						C	T
scaffold_34	C	174979		C					T		T						T	C
scaffold_34	C	175120		C		A			A		A						A	C
scaffold_34	T	175328		A		T			T		T						T	A
scaffold_34	C	175464		T		C			C		C						C	T
scaffold_35	A	33633	A		A												--	A
scaffold_35	T	40701	T						C	C							C	T
scaffold_35	A	52369	A														--	A
scaffold_35	A	58123	A							C							C	A
scaffold_35	C	58156								A							A	--
scaffold_35	C	58230	T							C							C	T
scaffold_35	G	58606	G							A							A	G
scaffold_35	A	58748	A						G	G							G	A
scaffold_35	A	60335	C							A							A	C
scaffold_35	G	60459	A							G							G	A
scaffold_35	C	60485	A							C							C	A
scaffold_35	A	97816				C	C			C	C		C		C		C	--
scaffold_36	A	532		G			A		A	A	A	A	A	A			A	G
scaffold_36	G	6569		T	T		G		G	G	G	G	G	G			G	T
scaffold_36	C	18004			C		T		T	T	T	T	T				T	C
scaffold_36	A	39320		A											T		T	A
scaffold_36	T	68076												A			--	A
scaffold_36	A	97761		A	C		A	C	C		A		C	A	C		C	A
scaffold_37	A	24585								T							T	--
scaffold_37	A	57145							G	G	G		G				G	--
scaffold_37	A	62307								T							T	--
scaffold_37	A	66145								T							T	--
scaffold_37	T	80220				T			T			T					T	--
scaffold_37	G	85141	C						C								C	--
scaffold_38	A	5202			A	G	G	G					G		G		G	A
scaffold_38	A	5407		A	A	C	C					C	C		C		C	A
scaffold_38	T	7925		T		A	A								A		A	T
scaffold_38	T	11365				A	A								A		A	--
scaffold_38	G	25077				T	T			T							T	--
scaffold_38	C	25318				T	T			T							T	--
scaffold_38	T	26072				C	C			C							C	--
scaffold_38	A	26082				T	T			T							T	--
scaffold_38	C	28591				T	T			T							T	--
scaffold_38	C	28962				T	T			T							T	--
scaffold_38	A	29020				G	G			G							G	--
scaffold_38	G	29401				A	A	A		A							A	--
scaffold_38	T	30024				C	C			C							C	--
scaffold_38	G	30091				A	A			A							A	--
scaffold_38	T	35270	C		C		T			T							T	C
scaffold_38	T	53050	T		T	C		C		C							C	T
scaffold_38	G	58547	G														--	G
scaffold_38	A	76710						G		G	G		G				G	--
scaffold_38	C	85033						T		T	T	T					T	--
scaffold_38	G	85845	G					C		C	C	C					C	G
scaffold_38	T	86070						A			A	A					A	--
scaffold_38	G	87583	G					A			A	A					A	G
scaffold_38	C	87864	C					T		T	T	T	T				T	C
scaffold_38	C	91841	T									C					C	T
scaffold_38	T	107475	A			T	T		T		T	T					T	A
scaffold_38	G	107500	A			G	G		G		G	G					G	A
scaffold_38	A	114242	A														--	A
scaffold_38	G	134094										A			A		A	--
scaffold_38	A	134128										C			C		C	--
scaffold_38	A	136460				T	T				T	T					T	--
scaffold_38	T	137152				A	A				A	A	A				A	--
scaffold_38	C	137230	C	C		T	T				T	T	T		T		T	C
scaffold_38	G	137319	G			A	A					A		A	A		A	G
scaffold_38	C	156790									C	C					C	--
scaffold_39	A	44850						A			A		A				A	--
scaffold_39	G	44882						G			G		G				G	--
scaffold_39	A	44954									G		G				G	--
scaffold_39	G	45133											G				G	--
scaffold_39	A	58223					T										T	--
scaffold_39	A	59943					C	C			C						C	--
scaffold_39	C	62200				T	T	T			T	T					T	--
scaffold_39	T	67013					A				A	A					A	--
scaffold_39	A	68194					G				G	G					G	--
scaffold_39	T	68202					C				C	C					C	--
scaffold_39	G	85397		G		C	C		C		C						C	G
scaffold_39	T	92013		T		A	A		A		A						A	T
scaffold_39	C	92203		C		T			T		T						T	C
scaffold_39	A	93433		G		A	A		A		A						A	G
scaffold_39	A	99213		A		G			G		G						G	A
scaffold_40	T	5443			T		A		A		A						A	T
scaffold_40	A	5468			A		C		C		C						C	A
scaffold_40	T	5531			C						T						T	C
scaffold_40	A	5632			A		G		G		G						G	A
scaffold_40	A	5872			A				T		T						T	A
scaffold_40	A	5892			A				G		G						G	A
scaffold_40	C	5926			C				T		T						T	C
scaffold_40	G	6010			G						A						A	G
scaffold_40	C	6641			C				T		T						T	C
scaffold_40	C	7978			C		A		A		A						A	C
scaffold_40	T	8250			T		A		A		A						A	T
scaffold_40	A	8401	A	A	A	G	G		G		G						G	A
scaffold_40	A	8429		A	A		G		G		G						G	A
scaffold_40	C	8485			C		T		T		T						T	C
scaffold_40	G	8587			G		A		A		A						A	G
scaffold_40	G	8968		G	G	A	A		A		A						A	G
scaffold_40	A	9004		A	A	G	G		G		G						G	A
scaffold_40	T	9448			T	A			A		A						A	T
scaffold_40	G	9589			G		A		A		A						A	G
scaffold_40	C	9674			C				T		T						T	C
scaffold_40	T	9746			T		A				A						A	T
scaffold_40	A	10247			A		C		C		C						C	A
scaffold_40	G	10519			G		A		A		A						A	G
scaffold_40	T	11159			T	A	A		A		A						A	T
scaffold_40	G	11593									A						A	--
scaffold_40	T	12640			T	C			C		C						C	T
scaffold_40	A	12695			A	T			T		T						T	A
scaffold_40	T	13171			T				C		C						C	T
scaffold_40	A	19524		A		G			G		G						G	A
scaffold_40	A	36520		A					A								--	--
scaffold_40	T	41329		T		C	C	C			C					C	C	T
scaffold_40	T	41417		T		A	A	A	A		A					A	A	T
scaffold_40	T	52598		T		C	C	C								C	C	T
scaffold_40	G	52792		G		A	A	A								A	A	G
scaffold_40	A	74695										T					T	--
scaffold_40	A	74713				T						T					T	--
scaffold_40	A	74718				T						T					T	--
scaffold_40	G	84323		A					G		G	G			G		G	A
scaffold_40	C	95207							T		T						T	--
scaffold_40	A	97915						A	A		A						A	--
scaffold_40	C	99830						A	A		A						A	--
scaffold_41	A	9592		G													--	G
scaffold_41	A	96228					T										T	--
scaffold_41	G	96970		G	G	T	T	T			T						T	G
scaffold_41	C	98265		A	A		A	A	A								A	--
scaffold_42	T	116131		T													--	T
scaffold_42	C	135028	C	C			G										G	C
scaffold_42	A	161916	A			T	T	T								T	T	A
scaffold_43	T	25938		T	T							G		G			G	T
scaffold_43	T	35354	A	A	A	A						A					--	A
scaffold_43	T	40680	T	T	T	A										T	A	T
scaffold_43	C	41649	C	C	C	A		A	A								A	C
scaffold_43	T	57871	T	T	T	A	A	A		A							A	T
scaffold_43	C	59370	C	C	C	T	T	T	T	T	T			T		T	T	C
scaffold_43	G	68701	A		A	G	G	G		G	G			G		G	G	A
scaffold_43	G	81303	G		G	A		A			A			A	A		A	G
scaffold_43	A	81632				G		G			G						G	--
scaffold_43	T	81663			T	A		A			A			A			A	T
scaffold_43	T	81697	T		T	C		C			C				C		C	T
scaffold_43	A	81711	A		A	G		G			G			G	G		G	A
scaffold_43	T	81717	T		T	C		C			C			C	C		C	T
scaffold_43	A	81832			A	G		G			G			G	G		G	A
scaffold_43	T	82064	T		T	G	G	G		G	G			G	G		G	T
scaffold_43	A	82144	A		A	G		G		G	G			G	G		G	A
scaffold_43	A	82302	A		A	G		G		G	G		G	G	G		G	A
scaffold_43	T	82496	C		C	T		T		T	T	T	T	T	T		T	C
scaffold_43	T	91745	T					A	A		A						A	T
scaffold_43	C	92022	C						T		T		T	T			T	C
scaffold_43	A	92567	T					A	A		A			A			A	T
scaffold_43	T	92715	T					A	A		A			A			A	T
scaffold_43	C	94236	C					T	T		T			T			T	C
scaffold_43	T	94950	A						T								T	A
scaffold_43	T	112234		T				A						A			A	T
scaffold_43	C	115297			C						T			T			T	C
scaffold_43	C	123573			C			T						T			T	C
scaffold_43	A	123927			A			G					G	G			G	A
scaffold_43	T	128288			T									C			C	T
scaffold_43	C	128824			C			T					T	T			T	C
scaffold_43	G	128943			A		G	G					G	G			G	A
scaffold_43	G	129022			G		A	A						A			A	G
scaffold_43	C	129093			C			A					A	A		A	A	C
scaffold_43	A	129162			A	G		G					G	G		G	G	A
scaffold_43	A	129244			A									G			G	A
scaffold_44	A	6862	A			C						C					C	A
scaffold_44	A	8067	C			C		C		C	C	C					C	--
scaffold_44	T	14377	T			A				A		A					A	T
scaffold_44	T	14743	C			T				T		T					T	C
scaffold_44	C	16556	C							A		A					A	C
scaffold_44	C	17821	C			A				A		A					A	C
scaffold_44	G	17950	A			G				G		G					G	A
scaffold_44	G	18529	A			G				G		G					G	A
scaffold_44	A	18550	G			A				A		A					A	G
scaffold_44	T	18725	T			C				C		C					C	T
scaffold_44	A	21696					C			C	C				C		C	--
scaffold_44	T	24577					C	C		C	C				C		C	--
scaffold_44	A	48522			G					A			A		A		A	G
scaffold_44	G	50013			A			G					G		G		G	A
scaffold_44	A	61787		A	A		C	C		C			C		C		C	A
scaffold_44	A	68901		A	A		C	C	C		C		C		C		C	A
scaffold_44	A	70265			A		G	G			G		G		G		G	A
scaffold_44	A	76674		A	A		C			C	C						C	A
scaffold_44	A	81032	A	A	A		G			G							G	A
scaffold_44	T	101577		T			G		G	G	G						G	T
scaffold_44	A	103818		G			A			A	A						A	G
scaffold_44	G	105880		G			A		A	A	A						A	G
scaffold_44	G	123385	A			G	G								G	G	G	A
scaffold_45	T	18275	T	T			A	A			A		A				A	T
scaffold_45	C	21822	C	C	C		A	A					A				A	C
scaffold_45	T	26819	G	G	G			T					T				T	G
scaffold_45	A	41827			G								A				A	G
scaffold_45	C	72033		C								T					T	C
scaffold_45	C	72275		T								T	T				T	--
scaffold_45	C	78677		C									T				T	C
scaffold_45	G	79050		A								G					G	A
scaffold_45	G	84291		A		G						G	G				G	A
scaffold_45	G	93865		G							A	A	A	A			A	G
scaffold_45	A	94873		A							T	T	T				T	A
scaffold_45	T	98352		T					T			C	C				C	T
scaffold_46	A	24298							G		G		G				G	--
scaffold_46	G	32165			G				T		T		T				T	G
scaffold_46	A	47321	T							A							A	T
scaffold_46	A	68620	A		A						G	G					G	A
scaffold_46	G	71650	G						A		A						A	G
scaffold_46	C	72153	C														--	C
scaffold_46	C	72330	T														--	T
scaffold_46	A	75635	A								C						C	A
scaffold_47	C	3696	C	C		T	T	T							T		T	C
scaffold_47	C	4297	T			C	C	C							C		C	T
scaffold_47	C	7163	C			G	G	G							G		G	C
scaffold_47	A	7790	A				G								G		G	A
scaffold_47	A	51480				G											G	--
scaffold_48	A	21020				G						G			G		G	--
scaffold_48	T	76527		C	C	T										T	T	C
scaffold_48	T	116912							C								C	--
scaffold_48	G	119395							A								A	--
scaffold_48	A	136849	T	T		A		A	A		A						A	T
scaffold_48	T	140812	T						C								C	T
scaffold_48	A	140865	A					G	G								G	A
scaffold_48	C	140888	C						T								T	C
scaffold_48	T	143397	C														--	C
scaffold_48	G	143796	G														--	G
scaffold_48	G	146085	G														--	G
scaffold_48	G	149552	G														--	G
scaffold_48	G	150241	G														--	G
scaffold_48	A	154782	A												G		G	A
scaffold_49	G	16665					A			A	A						A	--
scaffold_49	T	34088	A	A			A		A		A						A	--
scaffold_49	A	34981	G	G		A	A	A	A		A						A	G
scaffold_49	T	36312	T	T			C		C		C						C	T
scaffold_49	T	38697	T	T			G		G		G						G	T
scaffold_49	T	114708		T													--	T
scaffold_49	T	114713		T													--	T
scaffold_49	G	134709		A				G						G			G	A
scaffold_49	G	136433		G				A						A			A	G
scaffold_49	T	136571						C						C			C	--
scaffold_49	T	141287		T										C			C	T
scaffold_49	T	143603		T			G			G				G			G	T
scaffold_49	C	145343		C			T			T				T			T	C
scaffold_49	T	153733												A			A	--
scaffold_49	A	177380		A				C	C			C	C			C	C	A
scaffold_49	A	193936		A													--	A
scaffold_49	C	195283		T				C									C	T
scaffold_49	A	195414		A				G									G	A
scaffold_49	C	195990		C				T				T					T	C
scaffold_49	T	196302		C				T									T	C
scaffold_50	T	55975		T	T								A				A	T
scaffold_50	T	60431		T	T	A					A		A				A	T
scaffold_50	T	92269							A								A	--
scaffold_50	T	95508		C			C	C	T	C			T	C	C		C	T
scaffold_50	A	103585					G		G								G	--
scaffold_50	G	116335			G	A	A		A	A							A	G
scaffold_50	A	116656					G		G	G			G				G	--
scaffold_50	A	124942			A		G										G	A
scaffold_50	A	127005	A		A		G		G	G		G					G	A
scaffold_50	C	127392	C			T	T		T	T							T	C
scaffold_50	G	128649			A	G	G		G	G		G					G	A
scaffold_50	C	128969	T			C	C		C	C		C					C	T
scaffold_51	A	1540				T					T						T	--
scaffold_51	T	5258				A			A	A	A						A	--
scaffold_51	C	5769				T			T	T	T						T	--
scaffold_51	T	5838				C			C	C	C						C	--
scaffold_51	A	20163		G		A			A	A	A				A		A	G
scaffold_51	A	37099							G	A			G				G	A
scaffold_51	A	50256			A	C				C					C		C	A
scaffold_51	T	50969	C		C					T					T		T	C
scaffold_52	T	10760	A			T	T			T	T	T					T	A
scaffold_52	A	12371	A			C	C				C	C					C	A
scaffold_52	C	13757	C			T	T					T					T	C
scaffold_52	C	14274	A			C	C				C	C					C	A
scaffold_52	A	16876				A	A				A	A					A	--
scaffold_52	A	18070	A			G	G				G	G					G	A
scaffold_52	T	20715	G			T	T			T	T	T					T	G
scaffold_52	T	21623	A			T	T				T	T					T	A
scaffold_52	G	36547			A		G					G		G			G	A
scaffold_52	A	38384					G					G					G	--
scaffold_52	C	48374			C		T			T		T					T	C
scaffold_52	C	48466			C		T			T	T	T					T	C
scaffold_52	C	48475			C		T			T	T	T					T	C
scaffold_52	C	48590					C			C	C	C					C	--
scaffold_52	T	48610								T		T					T	--
scaffold_52	G	52085										A					A	--
scaffold_52	G	52531			G							A					A	G
scaffold_52	A	52540			A												--	A
scaffold_52	G	52715										G					G	--
scaffold_52	C	52980			A						C	C					C	A
scaffold_52	T	53591								C							C	--
scaffold_52	A	57676			G					A	A	A					A	G
scaffold_52	T	58471			T						C						C	T
scaffold_52	G	58482			G						T						T	G
scaffold_52	C	69555			C												--	C
scaffold_52	T	69573			T												--	T
scaffold_52	A	87361			A	T								T			T	A
scaffold_53	C	18546							T		T						T	--
scaffold_53	T	57464			T				C	C							C	T
scaffold_53	A	57756			A				G	G							G	A
scaffold_53	T	58069			T				C	C							C	T
scaffold_53	T	58081			T				C	C							C	T
scaffold_53	A	58722			A				G	G							G	A
scaffold_53	A	58772			A				G	G							G	A
scaffold_53	C	59267			T				C	C							C	T
scaffold_53	A	60053			A				G	G							G	A
scaffold_53	T	61364		T	T		C	C		C	C				C		C	T
scaffold_53	C	61427		C	C		T	T		T					T		T	C
scaffold_53	C	61550		C	C					T	T				T		T	C
scaffold_53	A	61870		A	A		C			C	C				C		C	A
scaffold_53	A	61958		A	A		C	C		C	C				C		C	A
scaffold_53	A	69812	A						G		G						G	A
scaffold_53	A	69994							A								A	--
scaffold_54	G	27620	G												A		A	G
scaffold_54	G	51026	G		G		A	A		A	A			A	A		A	G
scaffold_54	G	51050	G		G		A	A		A	A			A	A		A	G
scaffold_54	A	51390	A					G			G			G	G		G	A
scaffold_54	C	53227	C		C			T		T	T			T	T		T	C
scaffold_54	G	55856	G		G		A	A	A	A	A				A		A	G
scaffold_54	T	55884	T		T		A	A	A	A	A				A		A	T
scaffold_54	A	56052	A		A		G	G			G				G		G	A
scaffold_54	A	56315	A		A		G	G		G	G				G		G	A
scaffold_54	A	56338	A		A			G		G	G				G		G	A
scaffold_54	T	57014	C	C	C		T	T		T	T				T		T	C
scaffold_54	G	57178	G	G	G		A	A	A	A	A				A		A	G
scaffold_54	C	57230	C		C		A	A			A				A		A	C
scaffold_54	C	57419	T		T		C	C		C	C				C		C	T
scaffold_54	A	104390	A			G		G			G	G	G				G	A
scaffold_56	C	24199	T						C								C	T
scaffold_56	G	54853		A			G			G		G	G	G			G	A
scaffold_56	C	56279		C			T			T		T	T	T			T	C
scaffold_56	A	58926		A			G					G	G	G			G	A
scaffold_56	G	92603		G		A	A				A						A	G
scaffold_57	G	2730		G					A	A							A	G
scaffold_57	G	2770		G					A	A							A	G
scaffold_57	G	2802		G					A	A							A	G
scaffold_57	G	3057		G													--	G
scaffold_57	C	3275		C													--	C
scaffold_57	C	3387		T													--	T
scaffold_57	T	3445		C						T							T	C
scaffold_57	G	3452		A						G							G	A
scaffold_57	T	4786		C					T	T				T			T	C
scaffold_57	T	8991		T					A								A	T
scaffold_57	G	9460		G					A					A			A	G
scaffold_57	A	9938		A	A				T								T	A
scaffold_57	A	10023		C					C								C	--
scaffold_57	C	10233		C	C		T	T	T					T			T	C
scaffold_57	A	16742		T	T			A	A	A							A	T
scaffold_57	C	16862		C	C		T	T	T	T							T	C
scaffold_57	C	17077		A	A		C	C	C	C							C	A
scaffold_57	G	17734		A	A			G	G	G							G	A
scaffold_57	G	68731					T										T	--
scaffold_57	G	83401					T										T	--
scaffold_57	T	84016					A			A							A	--
scaffold_58	T	75509	T	T	T	C				C	C		C				C	T
scaffold_58	A	95002										G					G	--
scaffold_58	T	119864					C		C	C						C	C	--
scaffold_58	T	123927							C	C						C	C	--
scaffold_59	G	7153	G		G												--	G
scaffold_59	A	10215			G	A									A		A	G
scaffold_59	A	10247			T	A									A		A	T
scaffold_59	G	10272			A	G									G		G	A
scaffold_59	C	10285			T	C									C		C	T
scaffold_59	A	10603			T	A	A								A		A	T
scaffold_59	T	10839			T	C	C								C		C	T
scaffold_59	A	10866			A	G	G								G		G	A
scaffold_59	T	10898			T	C	C								C		C	T
scaffold_59	G	10935			G	A									A		A	G
scaffold_59	C	11515			T	C	C								C		C	T
scaffold_59	A	12348			A	G	G								G		G	A
scaffold_59	T	12365			T	C	C								C		C	T
scaffold_59	G	13056			A	G					G				G		G	A
scaffold_59	T	13173			T	C			C		C				C		C	T
scaffold_59	A	14110			C	A			A		A				A		A	C
scaffold_59	A	14581			A	C	C				C				C		C	A
scaffold_59	C	15357			C	T			T		T				T		T	C
scaffold_59	C	15512			C	T			T		T				T		T	C
scaffold_59	T	16531			G	T	T		T		T				T		T	G
scaffold_59	A	17010			A	C	C		C		C				C		C	A
scaffold_59	T	17728			T	A	A		A		A				A		A	T
scaffold_59	C	18822				T	T		T		T				T		T	--
scaffold_59	C	19763				G	G		G		G				G		G	--
scaffold_59	T	19773				A	A		A		A				A		A	--
scaffold_59	A	19803				G			G		G				G		G	--
scaffold_59	T	19879				C	C		C		C				C		C	--
scaffold_59	G	19921				A	A		A		A				A		A	--
scaffold_59	A	19927				G	G		G		G				G		G	--
scaffold_59	T	19940				A	A		A		A				A		A	--
scaffold_59	A	20023				T			T		T				T		T	--
scaffold_59	T	20042									C						C	--
scaffold_59	A	20071				T			T		T				T		T	--
scaffold_59	A	20156				A	A		A		A				A		A	--
scaffold_59	T	20181					T		T		T				T		T	--
scaffold_59	A	20588				G	G		G		G				G		G	--
scaffold_59	A	20625				G	G		G		G				G		G	--
scaffold_59	G	28056								A	A	A					A	--
scaffold_59	A	105341				A		A	A	A			A	G		G	A	G
scaffold_59	T	105360				T		T	T	T			T	C		C	T	C
scaffold_59	G	105370				G		G	G	G			G	A		A	G	A
scaffold_59	G	105387				G		G	G	G			G	A			G	A
scaffold_59	A	150679											G				G	--
scaffold_59	A	151131											C				C	--
scaffold_59	A	151805											G				G	--
scaffold_59	T	151848											G				G	--
scaffold_59	C	152076											T				T	--
scaffold_59	C	152097											T				T	--
scaffold_59	G	157121						G					G				G	--
scaffold_59	T	157129						T					T				T	--
scaffold_59	A	157201						G					G				G	--
scaffold_59	A	157292											T				T	--
scaffold_59	G	157337											A				A	--
scaffold_59	A	157688											G				G	--
scaffold_59	A	163142				C				C			C				C	--
scaffold_59	A	166952				C				C			C				C	--
scaffold_59	G	168215	G			A				A			A				A	G
scaffold_59	G	169387				A							A				A	--
scaffold_59	C	169936	T			C				C							C	T
scaffold_59	T	172373	T			C											C	T
scaffold_59	G	172393				A											A	--
scaffold_59	T	172430	T			A											A	T
scaffold_59	C	172614	C										A				A	C
scaffold_59	T	173569	T			C											C	T
scaffold_59	T	173747	T			A											A	T
scaffold_59	A	173792				G				G							G	--
scaffold_59	A	173814	A			G											G	A
scaffold_59	T	173926				T											T	--
scaffold_59	G	173961				G											G	--
scaffold_59	T	174241	T			G	G										G	T
scaffold_59	A	174277	A			T											T	A
scaffold_59	A	174319	A			T											T	A
scaffold_59	A	174325	A														--	A
scaffold_59	C	174364	C			T											T	C
scaffold_59	C	174386	C			T											T	C
scaffold_59	A	174414	A														--	A
scaffold_59	T	174453	T			C											C	T
scaffold_59	C	174460	C			T											T	C
scaffold_59	G	174805				G											G	--
scaffold_59	A	175058				T											T	--
scaffold_60	G	2			G	G					G						G	--
scaffold_61	G	6055						T									T	--
scaffold_61	C	6404						A									A	--
scaffold_61	T	7317						A									A	--
scaffold_61	A	8649						G									G	--
scaffold_61	A	8933						G									G	--
scaffold_61	A	9116						C							C		C	--
scaffold_61	T	9708						C							C		C	--
scaffold_61	T	9818						C									C	--
scaffold_61	A	18861													G		G	--
scaffold_61	G	70758			T	G	G										G	T
scaffold_61	T	89309					C					C			C		C	--
scaffold_61	C	136192			C										C		--	C
scaffold_61	A	136197			A												--	A
scaffold_62	T	21307			T									A			A	T
scaffold_62	T	44281		T	T		A	A	A		A		A				A	T
scaffold_62	A	90104			A	T			T			T		T			T	A
scaffold_63	T	63255		T		C				T						C	C	T
scaffold_64	T	18215		A			A					A					A	--
scaffold_64	T	27706			C	T	T						T		T		T	C
scaffold_64	C	27731			T	C	C								C		C	T
scaffold_64	C	27752			T	C	C								C		C	T
scaffold_64	A	30378			A	G	G						G		G		G	A
scaffold_64	C	40062			A	C	C										C	A
scaffold_64	A	52815			A		T	T					T				T	A
scaffold_65	G	22656			G		A		A	A							A	G
scaffold_65	G	25103			A		G		G	G							G	A
scaffold_65	T	72317			T		G		G	G							G	T
scaffold_65	G	124833		G		A				A				A			A	G
scaffold_66	T	1045	C	T		T		T	T	T	T				C		T	C
scaffold_66	T	15658	T		T									C			C	T
scaffold_66	G	17507			A		G				G						G	A
scaffold_66	G	18577			G						A						A	G
scaffold_66	A	18685	A								G						G	A
scaffold_66	C	18784	C		C		T				T						T	C
scaffold_66	A	23434			A		G				G						G	A
scaffold_66	G	30236			G						T			T			T	G
scaffold_66	T	62568				C	C			C					C		C	--
scaffold_66	C	72788				C					C						C	--
scaffold_66	A	73104			A		G				G						G	A
scaffold_66	G	74553			A		G				G						G	A
scaffold_66	G	74565			A		G				G		G				G	A
scaffold_66	A	75400									A						A	--
scaffold_66	G	75825									A						A	--
scaffold_66	T	76122									C						C	--
scaffold_66	T	76134									C						C	--
scaffold_66	C	76399			C		A	A			A						A	C
scaffold_66	A	76448	A		A			G			G						G	A
scaffold_66	T	76550			T						A						A	T
scaffold_66	A	76657			A						G						G	A
scaffold_66	A	77036									A						A	--
scaffold_66	G	77095					G				G						G	--
scaffold_66	T	77158			C						T						T	C
scaffold_66	A	79639		A		G			G								G	A
scaffold_66	T	79809		T		C			C					C			C	T
scaffold_66	C	81160		C													--	C
scaffold_66	G	81938		G													--	G
scaffold_66	A	81947		A													--	A
scaffold_66	A	84274		A										G			G	A
scaffold_66	G	84559		A													--	A
scaffold_66	A	85272		A													--	A
scaffold_66	G	91087		C													--	C
scaffold_67	G	38829			G	A	A	A	A			A			A		A	G
scaffold_67	A	71052								T							T	--
scaffold_67	G	88088		G					G								G	--
scaffold_67	T	93133		T					A				A				A	T
scaffold_67	T	120447						G	G				G				G	--
scaffold_67	T	124511		T					C					C		C	C	T
scaffold_67	G	146715						A	A	A	A	A			A		A	--
scaffold_67	A	147529								A	A	A		T	A	T	A	T
scaffold_67	C	149302						T	T		T	T	T				T	--
scaffold_67	T	150581						C	C	C	C	C	C				C	--
scaffold_67	C	151168					T	T	T	T	T	T	T				T	--
scaffold_67	G	151572						G	G	G	G	G	G				G	--
scaffold_67	T	151583						T	T	T	T	T	T				T	--
scaffold_67	T	151908							C	C	C	C	C				C	--
scaffold_67	T	151965						C	C		C	C	C				C	--
scaffold_68	T	15006		A		T	T	T		T	T						T	A
scaffold_68	C	15018		T	T	C	C	C		C	C						C	T
scaffold_68	T	15034		C	C	T	T	T		T	T						T	C
scaffold_68	C	15061			T	C	C	C		C	C						C	T
scaffold_68	T	15141		C	C	T	T	T		T	T						T	C
scaffold_68	T	15180		C	C	T	T	T		T	T						T	C
scaffold_68	G	15192		A	A	G	G	G		G	G						G	A
scaffold_68	A	21140								A							A	--
scaffold_68	A	21585		A						A							A	--
scaffold_68	T	22543								T							T	--
scaffold_68	T	35312	C	C	C		T		T	T							T	C
scaffold_68	T	38646	C		C		T		T	T							T	C
scaffold_68	A	47831	A	A	A		G		G			G					G	A
scaffold_68	G	69083			G							A					A	G
scaffold_68	A	92089	T		T				T	T		T					T	--
scaffold_69	C	5808			C			T	T	T		T					T	C
scaffold_69	A	9170			A			G	G	G		G					G	A
scaffold_69	G	9633						C	C	C		C					C	--
scaffold_69	T	44948					A										A	--
scaffold_69	A	68892		A	A	G	G		G	G			G		G		G	A
scaffold_70	G	38949		G						T	T		T		T		T	G
scaffold_70	A	41525		A						T	T		T				T	A
scaffold_70	A	52188			A				G	G	G		G	G			G	A
scaffold_70	T	54299			A				T	T	T		T	T			T	A
scaffold_70	T	57885			T	G			G	G	G		G				G	T
scaffold_70	C	60488			C				T	T	T		T				T	C
scaffold_70	C	61489			C	T			T	T	T		T				T	C
scaffold_70	T	80429	C	C	C	T	T		T	T	T	T	T	T			T	C
scaffold_70	A	86425								C	C						C	--
scaffold_70	A	91937			A	G	G		G	G	G	G		G			G	A
scaffold_70	T	92270		C	C	T			T	T	T	T		T			T	C
scaffold_70	G	93530		T		G			G	G	G	G					G	T
scaffold_71	T	2013						T									T	--
scaffold_71	G	10894		A	A			G	A		A						--	--
scaffold_71	C	10899		T	T				T		T						--	--
scaffold_71	A	13609			G			A				G					A	G
scaffold_71	A	15306						G	G								G	--
scaffold_71	T	16025				C		T	T		C						--	--
scaffold_71	T	32507						C	C								C	--
scaffold_71	C	44105			C						T						T	C
scaffold_71	T	58267	T	T	T			G		G	G						G	T
scaffold_71	G	65974			G				T				T				T	G
scaffold_71	T	76088			T							A	A				A	T
scaffold_71	A	76469							A								A	--
scaffold_71	C	77188			T				T				T				T	--
scaffold_72	G	9333						G	G								G	--
scaffold_72	T	9356		A			A	T	T						A	A	T	A
scaffold_72	T	49825			T		A		A			A	A	A			A	T
scaffold_72	C	54575			C				T			T					T	C
scaffold_72	C	59963			C	A		A	A		A		A				A	C
scaffold_72	G	60443				A		A	A				A				A	--
scaffold_72	T	63105	T					A	A								A	T
scaffold_72	C	80822					T	T									T	--
scaffold_72	C	86140					T	T									T	--
scaffold_72	A	86886					A	A									A	--
scaffold_72	A	87709						T									T	--
scaffold_72	T	87982						T		T							T	--
scaffold_72	A	88300						G									G	--
scaffold_72	A	88317						C									C	--
scaffold_72	C	88381					T	T		T		T					T	--
scaffold_72	A	88459					G	G		G							G	--
scaffold_72	C	88490					T	T		T		T					T	--
scaffold_72	G	88508					A	A		A		A					A	--
scaffold_72	G	88698					A			A		A					A	--
scaffold_72	T	88748					G	G		G		G					G	--
scaffold_72	T	88761					C	C		C		C					C	--
scaffold_72	T	88777					A	A		A		A					A	--
scaffold_72	C	88800					T	T		T		T					T	--
scaffold_72	T	103354			T	A			A		A						A	T
scaffold_72	A	104402				T			T		T		T				T	--
scaffold_72	T	105914				C	C		C		C						C	--
scaffold_73	G	2040	G						A			A	A		A		A	G
scaffold_73	T	11253	T									A					A	T
scaffold_73	A	11563	G			A						A					A	G
scaffold_73	G	11658	G			A						A					A	G
scaffold_73	T	17535	T			G			G			G					G	T
scaffold_73	A	18856	G			A			A		A	A			A		A	G
scaffold_73	A	19199	G			A			A			A			A		A	G
scaffold_73	T	19225	C			T			T			T			T		T	C
scaffold_73	C	19237	T			C			C			C			C		C	T
scaffold_73	T	21201	T			C			C		C	C					C	T
scaffold_73	A	21716	A			C			C			C					C	A
scaffold_73	T	21867	C			T			T	T		T					T	C
scaffold_73	A	33028		A				T	T								T	A
scaffold_73	G	52878			A	G		G					G				G	A
scaffold_73	T	57368			T	G							G				G	T
scaffold_73	T	59710			T	G							G				G	T
scaffold_73	A	59721			A	G							G				G	A
scaffold_73	A	61055			A	G							G				G	A
scaffold_73	A	69356			A	G				G		G	G				G	A
scaffold_73	T	76884				C				C		C	C				C	--
scaffold_73	A	77839				T				T		T	T				T	--
scaffold_73	C	80532				T				T		T	T				T	--
scaffold_73	T	83116				C		C		C		C	C				C	--
scaffold_73	C	83270				T				T		T	T				T	--
scaffold_73	C	86722				T						T	T				T	--
scaffold_73	A	88378				G				G		G	G				G	--
scaffold_74	C	95498		C				C	C	C	T		C				C	T
scaffold_74	A	95506		A				A	A		T		A				A	T
scaffold_74	G	95515		G				G	G		A		G				G	A
scaffold_74	G	95529		G				G	G	G	A		G				G	A
scaffold_75	G	30558		A	A	G	G	G	G		G						G	A
scaffold_75	T	31893		T	T	C	C	C	C		C						C	T
scaffold_75	T	32345		T	T	C	C	C	C								C	T
scaffold_75	G	33850		A	A	G	G	G	G								G	A
scaffold_75	A	34682			A				T								T	A
scaffold_75	T	38069					G	G	G								G	--
scaffold_76	A	6990		A													--	A
scaffold_76	C	10187		C					T	T	T		T				T	C
scaffold_76	A	30689		A		T		T	T		T		T				T	A
scaffold_76	A	63072					G	G				G					G	--
scaffold_76	A	83492									G	G	G	G			G	--
scaffold_77	T	15045											G				G	--
scaffold_77	A	33671					G					G	G		G		G	--
scaffold_77	A	36579					G						G		G		G	--
scaffold_77	T	39201					A					A	A		A		A	--
scaffold_77	G	52507				A	A		A			A	A				A	--
scaffold_77	T	53089				C			C			C	C				C	--
scaffold_77	T	55791				T						T	T				T	--
scaffold_78	T	7839	C	C	C					T	T				T		T	C
scaffold_78	A	8210	A	A	A				G	G	G	G			G		G	A
scaffold_78	G	8309	G	G	G				A	A	A	A			A		A	G
scaffold_78	G	8361	G	G						T	T				T	A	T	G
scaffold_78	C	8525	C	C	C				G	G	G				G		G	C
scaffold_78	G	9368	T	T	T	G			G	G	G	G			G		G	T
scaffold_78	C	10583	C	C	C				T	T	T	T			T		T	C
scaffold_78	C	10649	C	C	C				A	A	A	A			A		A	C
scaffold_78	C	11125	C	C	C					G	G	G			G		G	C
scaffold_78	A	11180	A	A	A					G	G	G			G		G	A
scaffold_78	C	11240	C	C	C				T	T	T				T		T	C
scaffold_78	C	11555	C	C	C					T	T				T		T	C
scaffold_78	T	11620	T	T	T				C	C	C				C		C	T
scaffold_78	G	12011	G	G	G					A	A				A		A	G
scaffold_78	C	12516	C	C						T	T				T		T	C
scaffold_78	C	12592	T	T	T	C		C		C	C				C		C	T
scaffold_78	A	13004	A	A	A	T				T	T	T			T		T	A
scaffold_78	A	13085	G	G	G					A	A				A		A	G
scaffold_78	T	13828	G	G	G					T	T				T		T	G
scaffold_78	C	13836	A	A	A					C	C				C		C	A
scaffold_78	A	14126	T	T						A	A				A		A	T
scaffold_78	A	14704	A	A						G	G				G		G	A
scaffold_78	G	14812	G	G	G					A	A				A		A	G
scaffold_78	A	14898	G	G	G					A	A				A		A	G
scaffold_78	T	14934	G	G	G					T	T				T		T	G
scaffold_78	G	15363	G	G	G					A	A				A		A	G
scaffold_78	A	15856	A	A	A					G	G				G		G	A
scaffold_78	C	16652	A	A						C	C				C		C	A
scaffold_78	C	17395	C	C	C				T	T	T				T		T	C
scaffold_78	G	19123	G	G	G				A	A	A	A			A		A	G
scaffold_78	C	19847	C	C						A	A				A		A	C
scaffold_78	A	19944	A	A					C	C	C				C		C	A
scaffold_78	C	20773	T	T	T				C	C	C				C		C	T
scaffold_78	A	21840	A	A					G	G	G				G		G	A
scaffold_78	T	21854	T	T					C	C	C				C		C	T
scaffold_78	A	23428	A	A					T	T	T				T		T	A
scaffold_78	C	24269	T	T					C	C	C						C	T
scaffold_78	T	25068		C					T	T							T	C
scaffold_78	G	25089	A	A					G	G	G						G	A
scaffold_78	A	25270	G	G					A	A	A						A	G
scaffold_78	C	26975	T	T					C	C	C				C		C	T
scaffold_78	A	27428	A	A					G	G	G				G		G	A
scaffold_78	A	27671	A	A					C	C	C				C		C	A
scaffold_78	A	27719	A	A					G	G	G						G	A
scaffold_78	T	27910	C	C					T	T	T				T		T	C
scaffold_78	G	27932	A	A					G	G	G				G		G	A
scaffold_78	A	28031	A	A					G	G	G						G	A
scaffold_78	G	28078		G					A	A	A						A	G
scaffold_78	C	28083	C	C					A	A	A						A	C
scaffold_78	A	28112	A	A					T	T	T						T	A
scaffold_78	G	28176	G	G					A	A	A						A	G
scaffold_78	G	28190	G	G					A	A	A						A	G
scaffold_78	A	28280		A					T	T	T						T	A
scaffold_78	A	28474	G						A	A	A						A	G
scaffold_78	T	28567	A	A					T	T	T				T		T	A
scaffold_78	C	28583	A	A					C	C	C				C		C	A
scaffold_78	T	28662	T	T					C	C					C		C	T
scaffold_78	T	28791	T	T					A	A	A						A	T
scaffold_78	G	29184							T						T		T	--
scaffold_78	T	29644	T	T					A		A				A		A	T
scaffold_78	T	29853	T	T					C		C				C		C	T
scaffold_78	C	29976	C	C					T		T				T		T	C
scaffold_78	T	29998	T	T													--	T
scaffold_78	A	30646	A	A							G						G	A
scaffold_78	A	30684		A					G		G						G	A
scaffold_78	T	30767		C					T	T	T						T	C
scaffold_78	A	30778	G	G					A	A	A						A	G
scaffold_78	C	32723		C													--	C
scaffold_78	A	33101							T	T							T	--
scaffold_78	A	33214							T	T							T	--
scaffold_78	G	33486		A					G								G	A
scaffold_78	A	33521		G					A	A							A	G
scaffold_78	T	54975		T				C			C						C	T
scaffold_78	C	56722		C				A									A	C
scaffold_78	C	64036		C													--	C
scaffold_78	A	68640		A	A			T				T					T	A
scaffold_78	T	111446	A				A			A		A				A	A	--
scaffold_78	T	137589					C		C	C		C					C	--
scaffold_78	T	138098					C	C	C	C		C					C	--
scaffold_79	T	1725		T													--	T
scaffold_79	G	2388	A				G										G	A
scaffold_79	G	2395	T				G										G	T
scaffold_79	G	2739		G			T					G					T	G
scaffold_79	A	2989		A													--	A
scaffold_79	G	3096		A													--	A
scaffold_79	G	7075	G	G													--	G
scaffold_79	C	9299		C													--	C
scaffold_79	T	11681		T													--	T
scaffold_79	C	13667		C									T				T	C
scaffold_79	C	67898			A			A	A	A					A		A	--
scaffold_80	T	18077									A						A	--
scaffold_80	G	22984						A		A	A						A	--
scaffold_80	G	36171				A	A			A			A	A			A	--
scaffold_80	C	36221				T				T			T				T	--
scaffold_80	G	36384								A				A			A	--
scaffold_80	T	36442				G				G				G			G	--
scaffold_80	C	36553				T											T	--
scaffold_80	A	36577								T				T			T	--
scaffold_80	C	36628				T				T				T			T	--
scaffold_80	A	36728				T				T				T			T	--
scaffold_80	G	37887				A			A	A				A			A	--
scaffold_80	T	38275				C				C				C			C	--
scaffold_80	G	48829		G	G			A	A								A	G
scaffold_80	T	49027		T	T			A	A	A							A	T
scaffold_80	T	49766		A					T								T	A
scaffold_80	A	50912		C													--	C
scaffold_80	T	76025			T	G	G		G	G							G	T
scaffold_80	T	82837				C		C									C	--
scaffold_81	T	1164		T					C					C			C	T
scaffold_81	A	1718							C			C		C			C	--
scaffold_81	T	8187				T			T	T		T					T	--
scaffold_81	T	16005	T					C	C				C				C	T
scaffold_81	C	54887			A	C	C		C								C	A
scaffold_81	T	55170			T	A	A		A								A	T
scaffold_81	G	72139		G	G	T	T		T						T		T	G
scaffold_81	C	74254		T	T	C	C		C						C		C	T
scaffold_81	A	76789		A	A	G	G		G						G		G	A
scaffold_81	A	79107		A	A				T						T		T	A
scaffold_81	G	82739		G			A		A						A		A	G
scaffold_81	A	83144		T			A	A	A						A		A	T
scaffold_81	G	84229	G		G	A	A	A	A	A		A					A	G
scaffold_81	G	84252	G		G	A	A	A	A	A		A					A	G
scaffold_81	A	84262	A		A	G	G	G		G		G					G	A
scaffold_81	T	84628	T		T	C	C	C	C	C		C	C				C	T
scaffold_81	T	84637	T		T	C	C	C	C	C		C	C				C	T
scaffold_81	C	84946	C		C	T	T			T		T					T	C
scaffold_81	C	84992	C		C	T	T			T		T					T	C
scaffold_81	T	85016	T		T	C	C			C		C					C	T
scaffold_81	T	85123	T		T	C	C			C		C					C	T
scaffold_81	G	85528	G			A	A		A	A	A	A					A	G
scaffold_82	T	13357				C	C		C	C	C	C					C	--
scaffold_82	A	17824							C		C	C					C	--
scaffold_82	G	19675							A			A					A	--
scaffold_82	T	20181				C		C	C		C	C					C	--
scaffold_82	G	20299						A	A			A					A	--
scaffold_82	T	38929						A		A		A					A	--
scaffold_82	A	57035			A		C		C					C			C	A
scaffold_82	A	60202			A		G		G	G							G	A
scaffold_82	A	78948										T					T	--
scaffold_82	A	81977									G	G					G	--
scaffold_82	G	84693									A	A					A	--
scaffold_82	T	85376							C		C	C					C	--
scaffold_82	T	93416										A					A	--
scaffold_82	C	102619			C						T	T	T				T	C
scaffold_82	G	104357			G		A		A		A	A	A				A	G
scaffold_82	C	104639			T		C		C		C	C	C				C	T
scaffold_82	A	104746			G		A				A	A	A				A	G
scaffold_82	A	105310			G						A	A	A				A	G
scaffold_82	T	107116									C						C	--
scaffold_82	T	107346									C						C	--
scaffold_82	G	107394									A						A	--
scaffold_82	G	107468									A	A					A	--
scaffold_82	G	107489									A						A	--
scaffold_82	T	107494									C						C	--
scaffold_82	G	107527									A		A				A	--
scaffold_82	G	107561									A						A	--
scaffold_82	A	107603			A						G	G					G	A
scaffold_83	T	31522		T				C					C		C		C	T
scaffold_83	G	31558		G									A				A	G
scaffold_83	G	31705		G													--	G
scaffold_83	T	31714		T				C									C	T
scaffold_83	A	31865		G			A	A				A	A		A		A	G
scaffold_83	G	31942		A				G							G		G	A
scaffold_83	A	31987		G				A							A		A	G
scaffold_83	T	32039		C				T				T	T		T		T	C
scaffold_83	G	32167		G				A					A		A		A	G
scaffold_83	A	32215		G			A	A				A	A				A	G
scaffold_83	T	32347		T			C	C				C	C		C		C	T
scaffold_83	A	32362		A			G	G	G			G	G		G		G	A
scaffold_83	G	32374		G			A	A				A	A		A		A	G
scaffold_83	C	32395		C			T	T	T			T	T		T		T	C
scaffold_83	A	32452		A			G	G	G			G			G		G	A
scaffold_83	T	32726		T				G									G	T
scaffold_83	C	33038		C			T	T					T		T		T	C
scaffold_83	T	33048		T				A				A	A		A		A	T
scaffold_83	A	33053		A				G				G	G		G		G	A
scaffold_83	A	33106		A			G	G				G	G		G		G	A
scaffold_83	C	33119		C			T	T				T	T		T		T	C
scaffold_83	C	33127		C			T	T				T	T		T		T	C
scaffold_83	G	33183		G			A	A				A	A		A		A	G
scaffold_83	C	33195		C			G	G				G	G		G		G	C
scaffold_83	T	33245		T			C	C					C				C	T
scaffold_83	A	33289		A			G	G				G	G		G		G	A
scaffold_83	A	33331		A			G	G				G	G		G		G	A
scaffold_83	C	33375		C			T	T	T			T	T		T		T	C
scaffold_83	T	33448		T			C	C	C			C	C		C		C	T
scaffold_83	T	33643		C				T	T			T	T		T		T	C
scaffold_83	C	33665		T			C	C	C			C	C		C		C	T
scaffold_83	G	33700		T			G	G	G				G		G		G	T
scaffold_83	G	33724		A			G	G	G			G	G		G		G	A
scaffold_83	T	33745		C			T	T	T			T	T		T		T	C
scaffold_83	C	33803		T				C	C			C	C		C		C	T
scaffold_83	G	33830		A				G	G						G		G	A
scaffold_83	T	33907		T				C	C			C	C				C	T
scaffold_83	T	34018		T			C	C	C			C	C		C		C	T
scaffold_83	A	34049		A				G	G				G		G		G	A
scaffold_83	A	34075					C	C				C	C		C		C	--
scaffold_83	A	34092		A			G	G	G				G		G		G	A
scaffold_83	A	34131		A			G	G	G				G		G		G	A
scaffold_83	A	34136		A			G	G	G				G		G		G	A
scaffold_83	A	34165		A				C	C				C				C	A
scaffold_83	C	34313		C				T	T				T				T	C
scaffold_83	A	34330		A				T	T				T				T	A
scaffold_83	G	34356		G				A	A						A		A	G
scaffold_83	G	34370		G				A	A						A		A	G
scaffold_83	A	34394		A			G	G							G		G	A
scaffold_83	C	34416		C			T	T	T				T		T		T	C
scaffold_83	A	34466		A				G	G				G		G		G	A
scaffold_83	T	34502		T				C	C			C			C		C	T
scaffold_83	C	34600		T				C	C			C	C		C		C	T
scaffold_83	T	34612		C				T	T			T	T		T		T	C
scaffold_83	A	34652		A				G	G			G	G		G		G	A
scaffold_83	T	34670		T				A	A			A	A		A		A	T
scaffold_83	T	34828		T				C	C						C		C	T
scaffold_83	G	34886		G				T	T				T				T	G
scaffold_83	T	38934						T	T				T		T		T	--
scaffold_83	T	38974		C				T	T				T		T		T	C
scaffold_83	G	52962						A	A		A	A	A	A			A	--
scaffold_83	G	53153						A	A			A	A	A			A	--
scaffold_83	T	53165						C	C			C	C	C			C	--
scaffold_83	T	53183							G				G	G			G	--
scaffold_83	G	53587							A		A		A	A			A	--
scaffold_83	T	53620							A				A	A			A	--
scaffold_83	C	53683						A	A		A			A			A	--
scaffold_83	T	54013						C	C		C		C	C			C	--
scaffold_83	T	54348						A	A				A	A			A	--
scaffold_83	A	55646							T				T	T			T	--
scaffold_83	C	56966							T				T	T			T	--
scaffold_83	A	56976							G				G	G			G	--
scaffold_83	G	68836							A	A							A	--
scaffold_83	T	69327							A	A	A		A				A	--
scaffold_83	C	69366						T	T	T	T		T				T	--
scaffold_83	C	69425						T	T	T	T		T				T	--
scaffold_83	A	70862						G	G	G			G				G	--
scaffold_83	A	70908						G	G	G	G		G				G	--
scaffold_83	G	71913					A	A	A	A	A		A				A	--
scaffold_83	T	71959					G	G	G	G	G		G				G	--
scaffold_83	T	72169							C	C	C		C				C	--
scaffold_83	T	72201				C	C	C	C	C	C		C				C	--
scaffold_83	C	72275				T	T	T	T	T	T	T	T				T	--
scaffold_83	C	72328					C	C	C	C	C		C				C	--
scaffold_83	G	72337					G	G	G	G	G		G				G	--
scaffold_83	T	72821							G	G	G		G				G	--
scaffold_83	G	72845							A	A	A		A				A	--
scaffold_83	C	72865							A	A	A		A				A	--
scaffold_83	G	73206						C	C	C			C				C	--
scaffold_83	G	77110			A												--	A
scaffold_83	C	77125			T												--	T
scaffold_83	T	78979				C	C			C	C						C	--
scaffold_83	G	80125			A	G				G	G						G	A
scaffold_83	G	80141			A	G	G			G	G						G	A
scaffold_83	T	80514				C				C	C						C	--
scaffold_83	T	80543				G				G	G						G	--
scaffold_83	C	80584				T				T	T						T	--
scaffold_83	T	80619				C				C	C						C	--
scaffold_83	T	80796				G				G	G						G	--
scaffold_83	G	81686				A				A	A						A	--
scaffold_83	A	81790				T				T	T						T	--
scaffold_83	T	82891				A				A	A						A	--
scaffold_83	C	83125								T	T						T	--
scaffold_83	T	83565				C				C	C						C	--
scaffold_83	C	84183				T				T	T						T	--
scaffold_84	G	3696				A	A		A	A		A		A			A	--
scaffold_84	C	5619	T			C	C		C	C		C					C	T
scaffold_84	A	5653	G			A			A	A		A					A	G
scaffold_84	C	6106	T				C		C	C		C		C			C	T
scaffold_84	A	6379					G		G	G		G					G	--
scaffold_84	T	6790	T						C	C		C					C	T
scaffold_84	G	7375	G			A	A		A	A		A		A			A	G
scaffold_84	G	7455	G			A	A		A			A					A	G
scaffold_84	A	8638	A				G		G	G		G					G	A
scaffold_84	T	9426	T						C	C		C					C	T
scaffold_84	C	9635	T						C	C		C					C	T
scaffold_84	G	11927							A	A		A					A	--
scaffold_84	T	21602							C		C						C	--
scaffold_84	T	21726							C								C	--
scaffold_84	G	29592			G				A		A						A	G
scaffold_84	G	33249				A			A		A						A	--
scaffold_84	A	44264		G		A					A						A	G
[truncated: 12,035 more rows]
[truncated: 2 more columns]

## Sheet: A5
scaffold	reference	position	SN03E	SN05E	SN01H	SN03C	SN05B	SN05D	SN06C	SN02A	MAT_A	MAT_B
scaffold_1	C	254949		C	A		A			A	A	C
scaffold_1	G	256870		G			A			A	A	G
scaffold_1	C	257627		G	C		C				C	G
scaffold_1	G	262963		G	A	A	A			A	A	G
scaffold_1	C	334378			T				T		T	--
scaffold_1	T	351703						A			A	--
scaffold_1	G	351765			A			A			A	--
scaffold_2	A	7288	C		C				C	C	C	--
scaffold_2	A	11613	G		A				A	A	A	G
scaffold_2	T	19805	C		T				T	T	T	C
scaffold_2	C	20799	T		C				C	C	C	T
scaffold_2	A	56221			T	T				T	T	--
scaffold_2	C	63048	C		T						T	C
scaffold_2	T	63618	G		T	T					T	G
scaffold_2	G	64533	G		T	T	T				T	G
scaffold_2	T	65824	T		C	C	C				C	T
scaffold_2	G	69638			A		A				A	--
scaffold_2	G	82284			T	T	T				T	--
scaffold_2	C	82362				C	C				C	--
scaffold_2	T	86163			T						T	--
scaffold_2	C	86176			C	C	C				C	--
scaffold_2	C	88341		C	T	T	T				T	C
scaffold_2	G	95076		A	G	G	G				G	A
scaffold_2	C	95646		T	C	C	C		C		C	T
scaffold_2	T	95812			C	C	C		C		C	--
scaffold_2	G	96212				G	G				G	--
scaffold_2	C	96532				C	C		C		C	--
scaffold_2	C	96670			T	T	T				T	--
scaffold_2	T	98664			T	T	T				T	--
scaffold_2	C	99185		C	A	A	A		A		A	C
scaffold_2	T	99607		A	T	T	T		T		T	A
scaffold_2	T	102312		C	T	T	T				T	C
scaffold_2	T	102419			T	T	T		T		T	--
scaffold_2	C	105266		T	C	C	C		C		C	T
scaffold_2	C	105562			C	C	C		C		C	--
scaffold_2	T	105833			C	C	C		C	C	C	--
scaffold_2	C	106778			T	T	T		T		T	--
scaffold_2	C	108650				T	T		T		T	--
scaffold_2	A	108755			G	G	G		G		G	--
scaffold_2	T	108934			T	T	T		T		T	--
scaffold_2	T	109017				T	T		T		T	--
scaffold_2	A	129025		G		A	A		A		A	G
scaffold_2	T	129234		C		T	T		T		T	C
scaffold_2	A	129754				A	A		A		A	--
scaffold_2	C	130160				T	T		T		T	--
scaffold_2	G	130465				G	G		G		G	--
scaffold_2	C	131710				C	C		C		C	--
scaffold_2	T	131971				C	C		C		C	--
scaffold_2	G	134526				G	G		G		G	--
scaffold_2	A	135476				G	G		G		G	--
scaffold_2	T	135632				G	G		G		G	--
scaffold_2	A	135640				G	G		G		G	--
scaffold_2	A	135707				T	T		T		T	--
scaffold_2	C	135975				G	G		G		G	--
scaffold_2	G	136198				A	A		A		A	--
scaffold_2	A	136291				T	T		T		T	--
scaffold_2	A	137778				A	A		A		A	--
scaffold_2	C	137918				C	C		C		C	--
scaffold_2	A	138130				A	A		A		A	--
scaffold_2	G	138240				A	A		A		A	--
scaffold_2	C	139209		A		C	C		C		C	A
scaffold_2	T	140167				T	T		T		T	--
scaffold_2	G	141455				G	G		G		G	--
scaffold_2	A	141665				A	A		A		A	--
scaffold_2	C	141790				T	T	T	T	T	T	--
scaffold_2	A	143572				A	A		A		A	--
scaffold_2	A	143944				A	A		A	A	A	--
scaffold_2	A	145948					T		T		T	--
scaffold_2	A	146642				A	A		A		A	--
scaffold_2	A	146712					T		T		T	--
scaffold_2	G	148628				A	A		A		A	--
scaffold_2	C	152776			A		A		A		A	--
scaffold_2	A	155789			G		G		G		G	--
scaffold_2	A	155840			G		G		G		G	--
scaffold_2	G	156116					A		A		A	--
scaffold_2	T	159545			A		A		A		A	--
scaffold_2	G	160073					A		A		A	--
scaffold_2	G	162446					A		A		A	--
scaffold_2	T	166385					T		T		T	--
scaffold_2	A	168693			G		G		G		G	--
scaffold_2	C	173209			T		T		T		T	--
scaffold_2	C	173884					T				T	--
scaffold_2	C	175529					T				T	--
scaffold_2	G	182051					A		A		A	--
scaffold_2	G	182082					A		A		A	--
scaffold_2	A	182089					G		G		G	--
scaffold_2	C	185706					T		T		T	--
scaffold_3	C	17483			T		T	T		T	T	--
scaffold_3	A	28109			G		G	G			G	--
scaffold_3	A	30796			G		G	G			G	--
scaffold_3	C	39986			T		T	T			T	--
scaffold_3	T	42859			A		A	A			A	--
scaffold_3	T	52019					G				G	--
scaffold_3	A	52440					G				G	--
scaffold_3	C	64221						T			T	--
scaffold_3	T	64229						C			C	--
scaffold_3	A	68292						G			G	--
scaffold_3	A	145119			G		G	G		G	G	--
scaffold_3	A	150170			T		T	T		T	T	--
scaffold_3	T	159906			T		T	T		T	T	--
scaffold_3	T	186426			A		A	A	A	A	A	--
scaffold_3	C	194595			T		T			T	T	--
scaffold_3	T	202962			A		A		A		A	--
scaffold_3	T	203188			T		T		T	T	T	--
scaffold_3	C	203309	T		C		C	C	C	C	C	T
scaffold_3	A	204344	G		A		A		A	A	A	G
scaffold_3	C	214633					T		T	T	T	--
scaffold_3	T	234975		T		A	A				A	T
scaffold_3	T	235407				T	T				T	--
scaffold_3	A	235460				A	A				A	--
scaffold_3	G	242413				G	G				G	--
scaffold_3	T	244171		C	T	T	T				T	C
scaffold_3	T	244225			T	T					T	--
scaffold_3	A	244298				A	A				A	--
scaffold_3	G	244474		A		G	G				G	A
scaffold_4	G	31078			T	T			T	T	T	--
scaffold_4	T	130909					A				A	--
scaffold_5	A	17085		G	G	A		G		G	G	A
scaffold_5	C	17096		T	T	C					T	C
scaffold_5	A	20707				G	G	G			G	--
scaffold_5	C	28544				T	T				T	--
scaffold_5	A	28549				T	T				T	--
scaffold_5	A	28580				G	G				G	--
scaffold_5	T	28588				C					C	--
scaffold_5	C	28815				T	T	T			T	--
scaffold_5	G	30678				A	A				A	--
scaffold_5	A	31146				T		T			T	--
scaffold_5	G	42942	G	G	G					G	--	G
scaffold_5	C	46936			T	T		T	T		T	--
scaffold_5	T	55118			A	A		A	A		A	--
scaffold_5	G	71765			T				T		T	--
scaffold_5	G	80544			A	A			A		A	--
scaffold_5	T	83566			C	C			C		C	--
scaffold_5	A	139478					G	G	G		G	--
scaffold_5	C	139489					T	T	T		T	--
scaffold_5	T	139583					C	C	C		C	--
scaffold_6	G	2242				A	G	A	G	G	G	A
scaffold_6	C	2288				T	C	T	C		C	T
scaffold_6	T	2424				T	C	T	C		C	T
scaffold_6	T	2540				C	T	C	T		T	C
scaffold_6	A	2677				A	G	A	G	G	G	A
scaffold_6	T	2806				T	C	T		C	C	T
scaffold_6	C	2934				T	C	T	C		C	T
scaffold_6	C	3009			C	T	C	T	C		C	T
scaffold_6	A	3028				G	A	G	A	A	A	G
scaffold_6	A	3479				A	G	A	G	G	g	A
scaffold_6	T	3516				T	C		C	C	C	T
scaffold_6	G	3534				G	A	G	A	A	A	G
scaffold_6	A	3612				G	A	G	A	A	A	G
scaffold_6	A	3698				A	G	A	G	G	G	A
scaffold_6	C	3708				C	T	C	T		T	C
scaffold_6	T	4223				T	C	T	C		C	T
scaffold_6	A	6205					A		A	A	A	--
scaffold_6	A	6435		T			A		A	A	A	T
scaffold_6	T	6483		C			T		T	T	T	C
scaffold_6	A	6492		G			A		A	A	A	G
scaffold_6	C	6642		T			C		C	C	C	T
scaffold_6	T	6789		T			A		A	A	A	T
scaffold_6	C	6800		C			T		T	T	T	C
scaffold_6	C	7145		T			C		C	C	C	T
scaffold_6	C	7290	T	T			C		C	C	C	T
scaffold_6	A	9599		G			A		A	A	A	G
scaffold_6	T	11235		C			T		T	T	T	C
scaffold_6	T	12620	C	C	T		T		T	T	T	C
scaffold_6	T	13706		G			T		T	T	T	G
scaffold_6	T	13733		A			T		T	T	T	A
scaffold_6	C	13823		A			C		C	C	C	A
scaffold_6	C	14442		C			T		T	T	T	C
scaffold_6	G	15738	G	G			A		A	A	A	G
scaffold_6	G	15756		G			T		T	T	T	G
scaffold_6	T	16600	C	C			T		T	T	T	C
scaffold_6	C	16723		T			C		C	C	C	T
scaffold_6	G	17449		G			C		C	C	C	G
scaffold_6	A	17622		A			G		G	G	G	A
scaffold_6	A	17670		A			G		G	G	G	A
scaffold_6	T	17857	C	C			T		T	T	T	C
scaffold_6	T	17893		T			C		C	C	C	T
scaffold_6	C	18486	A	A			C		C	C	C	A
scaffold_6	T	18858	A	A			T			T	T	A
scaffold_6	A	19117		A			T		T	T	T	A
scaffold_6	G	19986	G	G			A	A	A	A	A	G
scaffold_6	C	20517	C	C			T		T	T	T	C
scaffold_6	G	21077		A			G		G	G	G	A
scaffold_6	T	21253		C			T	T	T	T	T	C
scaffold_6	A	21796		T			A		A	A	A	T
scaffold_6	G	21963		G			A		A	A	A	G
scaffold_6	C	22111		T			C	C	C	C	C	T
scaffold_6	C	22848		T			C	C	C	C	C	T
scaffold_6	T	23818	C	C			T	T	T	T	T	C
scaffold_6	G	24626	T	T	G		G	G	G	G	G	T
scaffold_6	C	27012							C	C	C	--
scaffold_6	G	33056		T	G	G	G	G		G	G	T
scaffold_6	G	33699		A	G	G	G	G		G	G	A
scaffold_6	T	34466		C	T	T	T	T		T	T	C
scaffold_6	A	35319		T	A	A	A	A		A	A	T
scaffold_6	T	35765	C	C	T	T	T	T	T	T	T	C
scaffold_6	G	36034		G	A	A	A	A		A	A	G
scaffold_6	C	38374		T	C	C	C		C	C	C	T
scaffold_6	T	39108			T	T		T		T	T	--
scaffold_6	C	41922		C	T	T	T	T		T	T	C
scaffold_6	G	43144		G	T	T	T	T		T	T	G
scaffold_6	A	43623			A	A	A	A		A	A	--
scaffold_6	G	44658			G	G	G	G		G	G	--
scaffold_6	C	45227		T	C	C	C	C		C	C	T
scaffold_6	T	45412		T	A	A	A	A		A	A	T
scaffold_6	A	45549			T	T	T	T		T	T	--
scaffold_6	C	45616			T	T	T	T		T	T	--
scaffold_6	C	45694			T	T	T	T		T	T	--
scaffold_6	G	45732		G	A	A	A	A		A	A	G
scaffold_6	G	45746		G	A	A	A	A		A	A	G
scaffold_6	T	49927		A	T	T	T	T		T	T	A
scaffold_6	A	51889		A	T	T	T	T		T	T	A
scaffold_6	T	93162		T							--	T
scaffold_6	A	134006		A		A				A	A	--
scaffold_6	C	178865			T					T	T	--
scaffold_6	A	179534			G					G	G	--
scaffold_6	T	180116			G				G	G	G	--
scaffold_6	A	183090			G					G	G	--
scaffold_6	A	183121			C					C	C	--
scaffold_6	C	183260								T	T	--
scaffold_6	G	183305			A					A	A	--
scaffold_6	G	183465			A					A	A	--
scaffold_6	C	183618			T					T	T	--
scaffold_6	G	183756			T					T	T	--
scaffold_7	T	116367			T						T	--
scaffold_7	C	122566	C		A						A	C
scaffold_7	T	122576			G						G	--
scaffold_7	G	122989			A						A	--
scaffold_7	A	127411			A						A	--
scaffold_7	G	127816			G						G	--
scaffold_7	G	127858			G						G	--
scaffold_7	C	128187			T					T	T	--
scaffold_7	T	128221			C					C	C	--
scaffold_7	C	131381			C						C	--
scaffold_7	C	131418			C						C	--
scaffold_7	A	133385			C			C		C	C	--
scaffold_7	A	142125			G			G	G	G	G	--
scaffold_7	A	142213			G			G		G	G	--
scaffold_7	T	142302			T			T	T	T	T	--
scaffold_8	G	4547		A	G		G			G	G	A
scaffold_8	T	4580		C	T		T			T	T	C
scaffold_8	G	4868		A	G		G	G		G	G	A
scaffold_8	T	8177		A	T		T			T	T	A
scaffold_8	T	8533		C						T	T	C
scaffold_8	G	8597		A	G		G			G	G	A
scaffold_8	C	8639		A	C		C		C	C	C	A
scaffold_8	A	8919		G	A		A		A	A	A	G
scaffold_8	G	10531		G	A		A			A	A	G
scaffold_8	T	10892		T	A		A		A	A	A	T
scaffold_8	A	11886		G	A		A		A	A	A	G
scaffold_8	T	12488		A			T			T	T	A
scaffold_8	G	12729		A	G		G	G	G	G	G	A
scaffold_8	A	13074		G	A		A			A	A	G
scaffold_8	C	22090		C	T					T	T	C
scaffold_8	A	29229		T						T	--	T
scaffold_8	T	45751		C		T					T	C
scaffold_8	A	46156		T	A	A	A			A	A	T
scaffold_8	T	47295		A	T	T				T	T	A
scaffold_8	T	48236	T	T		C				C	C	T
scaffold_8	C	48502		C	T	T				T	T	C
scaffold_8	A	50308		A						T	T	A
scaffold_8	C	50599					T				T	--
scaffold_8	C	52386		C	T	T				T	T	C
scaffold_8	A	52434		A	G	G	G			G	G	A
scaffold_8	G	52965		G	A	A	A			A	A	G
scaffold_8	G	54143		A	G	G				G	G	A
scaffold_8	A	54242		A	T	T				T	T	A
scaffold_8	T	54494		C	T	T	T			T	T	C
scaffold_8	C	54645	C	C	T	T	T			T	T	C
scaffold_8	A	54682		A	G	G				G	G	A
scaffold_8	C	54834		G	C	C	C			C	C	G
scaffold_8	C	58361		C	T	T				T	T	C
scaffold_8	C	58380		C	G	G				G	G	C
scaffold_8	C	58426		C	T	T	T			T	T	C
scaffold_8	C	59593		C		A				A	A	C
scaffold_8	T	60250		T	C	C				C	C	T
scaffold_8	C	61060		T	C	C				C	C	T
scaffold_8	C	61187		T	C	C			C	C	C	T
scaffold_8	T	61234		T	C	C				C	C	T
scaffold_8	G	61549		G	A	A	A		A	A	A	G
scaffold_8	A	61949		G	A	A	A		A	A	A	G
scaffold_8	G	62042		G	T	T	T			T	T	G
scaffold_8	T	62096		A	T	T	T			T	T	A
scaffold_8	C	62122		A	C	C	C			C	C	A
scaffold_8	A	62137		G	A	A	A				A	G
scaffold_9	C	20663		C				C			--	C
scaffold_9	G	20674	A	G	A	A		G			A	G
scaffold_9	T	20682	C	T	C	C		T			C	T
scaffold_9	C	20697	A	C	A	A		C			A	C
scaffold_9	C	20739	T	C	T	T		C			T	C
scaffold_9	G	62607		T	G	G	G				G	T
scaffold_9	G	62633		A	G	G	G				G	A
scaffold_9	A	84556		T	A	A			A		A	T
scaffold_9	C	92198		C		T			T		T	C
scaffold_9	C	92294		C		T			T		T	C
scaffold_9	T	93846		A		T			T		T	A
scaffold_9	A	94514		T		A			A		A	T
scaffold_9	A	95398		T		A			A		A	T
scaffold_9	G	95560		A		G			G		G	A
scaffold_9	T	96019		C		T			T		T	C
scaffold_9	C	97672		C		T			T		T	C
scaffold_9	A	98775		A		T			T		T	A
scaffold_9	A	100594		A		C			C		C	A
scaffold_9	C	101673	T	T	C	C			C		C	T
scaffold_9	T	102984	C	C	T	T			T		T	C
scaffold_9	C	104908		T		C			C		C	T
scaffold_9	A	105685	A	A	G	G			G		G	A
scaffold_9	A	105918	A	A	G	G			G		G	A
scaffold_9	T	106986	G	G	T	T			T		T	G
scaffold_9	T	109269	C	C	T	T			T		T	C
scaffold_9	C	109660	T	T	C	C			C		C	T
scaffold_9	T	111489	T	T	C	C			C		C	T
scaffold_9	A	112245	A	A	T	T			T		T	A
scaffold_9	T	112270	T	T	C	C			C		C	T
scaffold_9	A	112328	A	A	G	G			G		G	A
scaffold_9	T	112568	C	C	T	T			T		T	C
scaffold_9	A	112586	T	T	A	A			A		A	T
scaffold_9	A	112592	G	G	A	A			A		A	G
scaffold_9	C	112949	T	T	C	C			C		C	T
scaffold_9	A	113852	A	A	G	G			G		G	A
scaffold_9	T	113891		T	C	C			C		C	T
scaffold_9	T	113914	T	T	C	C			C		C	T
scaffold_9	A	113955	A	A	T	T			T		T	A
scaffold_9	A	114030	A	A	T	T			T		T	A
scaffold_9	G	114091	G	G	T	T			T		T	G
scaffold_9	C	114115	C	C	T	T			T		T	C
scaffold_9	T	114156	T	T	C	C			C		C	T
scaffold_9	T	114210	T	T	C	C			C		C	T
scaffold_9	A	114542	A	A	T				T		T	A
scaffold_9	C	114693	C	C	G	G			G		G	C
scaffold_9	C	114804	A	A	C	C			C		C	A
scaffold_9	C	114846	T	T	C	C			C		C	T
scaffold_9	T	114852	A	A	T	T			T		T	A
scaffold_9	A	124018	A	A	C				C		C	A
scaffold_10	G	2706		C	G	G	G	G	G	G	G	C
scaffold_10	G	8672		A	G	G	G	G	G	G	G	A
scaffold_10	G	11800		G	A		A			A	A	G
scaffold_10	A	43534			G		G		G	G	G	--
scaffold_10	A	65073		T	A		A			A	A	T
scaffold_10	A	68537		A	G		G			G	G	A
scaffold_10	A	95995		C	A	A	A			A	A	C
scaffold_10	T	116639		G	T		T				T	G
scaffold_10	C	116755		T	C		C				C	T
scaffold_12	A	17089								G	G	--
scaffold_12	A	44664						G		G	G	--
scaffold_12	A	45466						G			G	--
scaffold_12	T	46698						A		A	A	--
scaffold_13	T	23696					A			A	A	--
scaffold_13	C	33311					T			T	T	--
scaffold_13	G	35441								A	A	--
scaffold_13	A	50360					G			G	G	--
scaffold_13	G	57644			A	A	A		A	A	A	--
scaffold_13	A	57653			T		T		T	T	T	--
scaffold_13	A	57695			T		T		T	T	T	--
scaffold_13	C	76837			T	T	T		T	T	T	--
scaffold_13	T	92545			T		T			T	T	--
scaffold_13	G	95050			A		A			A	A	--
scaffold_13	T	97528			A						A	--
scaffold_13	T	99830			T		T			T	T	--
scaffold_13	C	117433	T		C		C		C	C	C	T
scaffold_13	T	120416	A		T	T	T	T		T	T	A
scaffold_13	G	129075	A		G					G	G	A
scaffold_14	T	7482		T	C	C	C	C		C	C	T
scaffold_14	A	9789		G	A	A	A	A		A	A	G
scaffold_14	A	9887		A	G	G	G	G		G	G	A
scaffold_14	G	10432		G	A	A	A	A		A	A	G
scaffold_14	A	31439		C							--	C
scaffold_14	C	195360	C							T	T	C
scaffold_14	C	195369	C							T	T	C
scaffold_14	C	195390								T	T	--
scaffold_15	G	1833					A			A	A	--
scaffold_15	T	7684			C		C			C	C	--
scaffold_15	C	10540					T			T	T	--
scaffold_15	A	12070			G					G	G	--
scaffold_15	C	12669			T					T	T	--
scaffold_15	A	12738			G		G			G	G	--
scaffold_15	G	13638			G		G		G	G	G	--
scaffold_15	C	14657			T		T			T	T	--
scaffold_15	C	18198			G					G	G	--
scaffold_15	T	18238			C				C	C	C	--
scaffold_15	A	20050			C					C	C	--
scaffold_15	A	25000			G		G			G	G	--
scaffold_15	A	27138			G		G	G		G	G	--
scaffold_15	A	27178			G		G	G		G	G	--
scaffold_15	G	27499			A					A	A	--
scaffold_15	C	28494			A		A			A	A	--
scaffold_15	G	29235			A					A	A	--
scaffold_15	A	29271			G					G	G	--
scaffold_15	G	30779			A					A	A	--
scaffold_15	G	30901			A					A	A	--
scaffold_15	A	31545						G		G	G	--
scaffold_15	T	32623			C					C	C	--
scaffold_15	A	34909			G					G	G	--
scaffold_15	A	36047			G					G	G	--
scaffold_15	T	36142			C					C	C	--
scaffold_15	T	36505			C					C	C	--
scaffold_15	A	36525	A		G						G	A
scaffold_15	C	36584			T					T	T	--
scaffold_15	A	37609			A					A	A	--
scaffold_15	A	41443			G					G	G	--
scaffold_15	C	42477			T					T	T	--
scaffold_15	G	43897			A					A	A	--
scaffold_15	T	44209			T					T	T	--
scaffold_15	T	44459			C					C	C	--
scaffold_15	A	49813			C					C	C	--
scaffold_15	C	52231			T					T	T	--
scaffold_15	G	55041			A						A	--
scaffold_15	C	55088			T						T	--
scaffold_15	G	55710			A					A	A	--
scaffold_15	C	55925			T						T	--
scaffold_15	G	60643			A						A	--
scaffold_15	A	64526	G		A				A		A	G
scaffold_15	T	64587			T				T		T	--
scaffold_15	C	66969			T						T	--
scaffold_15	G	67666			A				A		A	--
scaffold_15	C	67718			T				T		T	--
scaffold_15	C	69029			T				T		T	--
scaffold_15	T	69386			T				T		T	--
scaffold_15	T	70968			T				T		T	--
scaffold_15	A	72535			A				A		A	--
scaffold_15	A	74497			A	A	A		A		A	--
scaffold_15	T	75000			A				A		A	--
scaffold_15	C	75644			T				T		T	--
scaffold_15	A	75975			A				A		A	--
scaffold_15	A	76023			A				A		A	--
scaffold_15	G	78297			A		A		A		A	--
scaffold_15	A	78829			A		A		A		A	--
scaffold_15	C	81885			T	T	T		T	T	T	--
scaffold_15	G	83922			A	A	A		A		A	--
scaffold_15	C	84024			T		T		T	T	T	--
scaffold_15	G	86950			A	A	A		A		A	--
scaffold_15	G	89221			A	A	A			A	A	--
scaffold_15	G	89444			A	A	A		A		A	--
scaffold_15	C	90294			T	T	T		T	T	T	--
scaffold_15	C	90430			T	T	T		T	T	T	--
scaffold_15	G	90465			A	A	A		A	A	A	--
scaffold_15	C	90784			T	T	T		T	T	T	--
scaffold_15	C	91682			T	T				T	T	--
scaffold_15	T	92119			A		A			A	A	--
scaffold_15	G	92166			A					A	A	--
scaffold_15	A	95485			T	T					T	--
scaffold_15	C	95657			T	T					T	--
scaffold_15	G	95794			A		A			A	A	--
scaffold_15	G	96801			T	T					T	--
scaffold_15	C	97353			T		T			T	T	--
scaffold_15	C	98867			T		T			T	T	--
scaffold_15	A	99908			A		A				A	--
scaffold_15	C	100939			T		T			T	T	--
scaffold_15	A	102599			G		G			G	G	--
scaffold_15	A	105510			G					G	G	--
scaffold_15	G	105830			A		A				A	--
scaffold_15	A	107661			A					A	A	--
scaffold_15	T	108388			C					C	C	--
scaffold_15	T	108426			C		C			C	C	--
scaffold_15	A	108491			G		G			G	G	--
scaffold_15	G	108516			A					A	A	--
scaffold_15	G	108543			A		A			A	A	--
scaffold_15	A	110545			G					G	G	--
scaffold_15	A	112541			G					G	G	--
scaffold_15	T	112875			C					C	C	--
scaffold_15	T	112933			C					C	C	--
scaffold_15	T	116658			C					C	C	--
scaffold_16	G	1009			A				A		A	--
scaffold_16	C	1060			A				A		A	--
scaffold_16	G	1077			T				T		T	--
scaffold_16	A	4720			C				C		C	--
scaffold_16	T	9447			T		T	T	T		T	--
scaffold_16	A	9616			G			G	G		G	--
scaffold_16	T	9642			C			C	C		C	--
scaffold_16	G	10829			A		A	A	A		A	--
scaffold_16	G	10886			T			T	T	T	T	--
scaffold_16	T	10918			C				C	C	C	--
scaffold_16	C	10930			T				T	T	T	--
scaffold_16	A	10947			T			T	T	T	T	--
scaffold_16	A	12469	G		A		A	A	A		A	G
scaffold_16	A	13076	T		A				A		A	T
scaffold_16	C	14746	C		A		A	A			A	C
scaffold_16	G	15644	G	G	A		A	A	A		A	G
scaffold_16	A	15934	G		A						A	G
scaffold_16	T	20417	A	A	T		T	T	T	T	T	A
scaffold_16	A	21017	A	A	G		G	G	G	G	G	A
scaffold_16	T	21412	C	C	T		T	T	T		T	C
scaffold_16	C	21538	A	A	C		C	C	C		C	A
scaffold_16	A	21618	A	A	G		G	G	G	G	G	A
scaffold_16	G	22894	G	G	A			A	A		A	G
scaffold_16	G	22973	G		A		A	A	A		A	G
scaffold_16	A	23322	T	T	A		A	A	A	A	A	T
scaffold_16	C	23558	C	C	T		T	T	T		T	C
scaffold_16	A	23722	A	A	G		G	G	G		G	A
scaffold_16	T	23736	T		C		C	C			C	T
scaffold_16	C	23816	C	C	T		T	T	T		T	C
scaffold_16	T	23858	T	T	C		C	C	C		C	T
scaffold_16	T	24067	C	C	T		T	T	T		T	C
scaffold_16	G	24243	A	A	G		G	G	G		G	A
scaffold_16	C	24371	C	C	T		T	T	T		T	C
scaffold_16	A	24378	A	A	T		T	T	T		T	A
scaffold_16	C	24455	T	T	C		C	C	C	C	C	T
scaffold_16	A	24466	G	G	A		A	A	A	A	A	G
scaffold_16	G	24483	A	A	G		G	G	G		G	A
scaffold_16	A	24506	T				A				A	T
scaffold_16	G	24684	G		A			A			A	G
scaffold_16	C	25094	A	A	C		C	C	C		C	A
scaffold_16	A	25461	T	T	A		A	A	A		A	T
scaffold_16	T	25471	G	G	T		T	T	T		T	G
scaffold_16	T	25571	T	T	C		C	C	C		C	T
scaffold_16	T	25757	A	A	T		T	T	T		T	A
scaffold_16	A	25830	G	G	A		A	A	A		A	G
scaffold_16	A	26034	A	A	G		G	G	G		G	A
scaffold_16	C	26576	T		C		C	C	C		C	T
scaffold_16	T	26612	A	A	T		T	T	T		T	A
scaffold_16	A	28055	T	T	A		A	A	A		A	T
scaffold_16	T	28631	C		T		T	T	T		T	C
scaffold_16	G	29643	C	C	G		G	G	G		G	C
scaffold_16	T	31592	C	C	T		T	T	T		T	C
scaffold_16	C	33322	G	G	C		C	C	C		C	G
scaffold_16	T	33378	C	C	T		T	T	T		T	C
scaffold_16	A	35569	A	A	G		G	G	G		G	A
scaffold_16	A	35575	A	A	T		T	T	T		T	A
scaffold_16	T	35633	T	T	C		C	C	C		C	T
scaffold_16	T	35733	T	T	C		C	C	C		C	T
scaffold_16	A	36661	A	A	T		T				T	A
scaffold_16	C	37784	T		C		C	C	C		C	T
scaffold_16	G	37835	T	T	G		G	G	G		G	T
scaffold_16	T	38948	A	A	T		T	T	T		T	A
scaffold_16	T	39160	T	T	G		G	G	G		G	T
scaffold_16	A	42680	C	C	A		A	A	A		A	C
scaffold_16	G	44437	G	G	A		A	A	A	A	A	G
scaffold_16	C	44604	C	C	A		A	A	A		A	C
scaffold_16	A	83564	T			A	A			A	A	T
scaffold_17	A	44831	T		T	T	T				T	--
scaffold_17	A	81331	T						A		A	T
scaffold_17	T	82213		A	T				T		T	A
scaffold_17	T	83114		A	T				T		T	A
scaffold_17	C	83228		T	C				C	C	C	T
scaffold_17	T	83691		T	A				A		A	T
scaffold_17	A	85070		A	T				T		T	A
scaffold_17	A	85847		A	G				G		G	A
scaffold_17	G	86086		G	A				A		A	G
scaffold_17	G	86243		G	A				A	A	A	G
scaffold_17	A	86256		A	T				T	T	T	A
scaffold_17	A	86332		A	G				G		G	A
scaffold_17	A	86384		A	C				C		C	A
scaffold_17	G	86441		G	A				A		A	G
scaffold_17	T	87553		T	C				C	C	C	T
scaffold_17	G	87643		G	A				A	A	A	G
scaffold_17	T	87736		T	A				A		A	T
scaffold_17	T	87741		T	A				A		A	T
scaffold_17	A	88511		T	A				A		A	T
scaffold_17	C	88582		T	C				C		C	T
scaffold_17	A	88805		T	A				A		A	T
scaffold_17	T	89369		T	C				C	C	C	T
scaffold_17	A	89710		C	A				A		A	C
scaffold_17	T	93683		T							--	T
scaffold_17	C	93863		T	C				C		C	T
scaffold_17	T	93928		A	T				T		T	A
scaffold_17	T	94097		A	T				T		T	A
scaffold_17	T	94451		T	A				A	A	A	T
scaffold_17	C	95952		C	T	T			T		T	C
scaffold_17	A	96046		A	G				G	G	G	A
scaffold_17	T	96301		A	T	T			T	T	T	A
scaffold_17	A	96414		G	A				A		A	G
scaffold_17	C	96629		C					A		A	C
scaffold_17	T	96801		A	T				T		T	A
scaffold_17	T	96849		C	T				T		T	C
scaffold_17	G	96938		A	G				G		G	A
scaffold_17	A	97055		G	A				A		A	G
scaffold_17	C	97131		C	T				T	T	T	C
scaffold_17	C	97801		T	C				C		C	T
scaffold_17	T	101520		C	T				T		T	C
scaffold_17	C	101528		T	C				C		C	T
scaffold_17	C	101586		A	C				C		C	A
scaffold_17	T	102038		A	T				T	T	T	A
scaffold_17	C	102056		T	C				C		C	T
scaffold_17	A	102166		A	G				G		G	A
scaffold_17	A	102252		G	A				A	A	A	G
scaffold_17	C	102296		T	C				C	C	C	T
scaffold_17	T	102577		C	T				T	T	T	C
scaffold_17	C	102615		A	C				C	C	C	A
scaffold_17	C	102645		T	C				C	C	C	T
scaffold_17	G	102815		G	A				A	A	A	G
scaffold_17	G	102824		G	T				T	T	T	G
scaffold_17	C	103099		T	C				C	C	C	T
scaffold_17	C	103139		T	C				C	C	C	T
scaffold_17	G	103154		A	G				G	G	G	A
scaffold_17	G	103239		G	C				C		C	G
scaffold_17	G	103250		G	C				C		C	G
scaffold_17	A	103282		A	G				G	G	G	A
scaffold_17	G	103484		T	G					G	G	T
scaffold_17	C	103503		T	C				C	C	C	T
scaffold_17	T	103542		A	T				T	T	T	A
scaffold_17	C	103551		T	C				C	C	C	T
scaffold_17	T	103644		T	A				A		A	T
scaffold_17	C	103675		C	A				A		A	C
scaffold_17	T	103741		T	C				C		C	T
scaffold_17	C	103751		C	T				T		T	C
scaffold_17	A	103842		G	A				A	A	A	G
scaffold_17	A	104010		A	T				T		T	A
scaffold_17	C	105602		C					T	T	T	C
scaffold_17	G	105937		G	T				T		T	G
scaffold_17	G	106201		G	T				T	T	T	G
scaffold_17	A	106232		A					T		T	A
scaffold_17	G	106348		A	G				G		G	A
scaffold_17	A	106436		G	A				A		A	G
scaffold_17	G	106500		A	G				G		G	A
scaffold_17	C	106645		T	C				C		C	T
scaffold_17	T	106828		C	T				T	T	T	C
scaffold_17	T	106888		T	C				C		C	T
scaffold_17	T	106906		T					A		A	T
scaffold_17	C	106946		C	A				A	A	A	C
scaffold_17	G	107088		A	G				G	G	G	A
scaffold_17	C	107390		G	C						C	G
scaffold_17	A	107398		G	A				A		A	G
scaffold_17	T	107413		A	T				T		T	A
scaffold_17	T	107460		A	T				T		T	A
scaffold_17	G	108574		G	A				A		A	G
scaffold_17	C	108658		C	T				T	T	T	C
scaffold_17	A	108954		G					A		A	G
scaffold_17	C	109380		T					C	C	C	T
scaffold_17	G	110727		T	G				G	G	G	T
scaffold_17	T	110891		T	C				C	C	C	T
scaffold_17	A	111568		T					A		A	T
scaffold_17	G	112303		G	A				A	A	A	G
scaffold_17	C	112316		C					T	T	T	C
scaffold_17	G	112334		G	A				A	A	A	G
scaffold_17	T	112600		T	C				C	C	C	T
scaffold_17	C	112664		C	T				T	T	T	C
scaffold_17	T	112723		T	A				A	A	A	T
scaffold_17	A	112779		A	G				G	G	G	A
scaffold_17	C	112793		C	T				T		T	C
scaffold_17	A	112805		A	G				G		G	A
scaffold_17	G	112931		T					G		G	T
scaffold_17	A	113373		A	G				G	G	G	A
scaffold_17	T	113479		T					C	C	C	T
scaffold_17	C	114666		A							--	A
scaffold_17	A	114880		G					A		A	G
scaffold_17	C	115032	T	T					C	C	C	T
scaffold_17	A	115320		C					A	A	A	C
scaffold_17	T	115666		T					C	C	C	T
scaffold_17	A	115733	A	A					G	G	G	A
scaffold_17	C	115927	C	C					T	T	T	C
scaffold_17	T	116159		A					T	T	T	A
scaffold_17	C	116376		T					C	C	C	T
scaffold_17	T	117058		A	T				T		T	A
scaffold_17	G	117206		G					A		A	G
scaffold_17	T	117223		T					G		G	T
scaffold_17	T	117549		C					T	T	T	C
scaffold_17	C	117565		T					C	C	C	T
scaffold_17	A	117950		T					A	A	A	T
scaffold_17	T	118335		A	T				T	T	T	A
scaffold_17	A	119760	G	G					A	A	A	G
scaffold_17	C	120177		C					T		T	C
scaffold_17	G	120262		A					G		G	A
scaffold_17	C	121352		T					C		C	T
scaffold_17	T	121516		C					T	T	T	C
scaffold_17	T	121522		C					T	T	T	C
scaffold_17	G	121529		T					G	G	G	T
scaffold_17	C	121606	C	C					A	A	A	C
scaffold_17	T	129719			G					G	G	--
scaffold_17	A	130073	A		G					G	G	A
scaffold_17	C	131008	T		C					C	C	T
scaffold_17	T	135900			A						A	--
scaffold_18	C	1786	C	C	T				T	T	T	C
scaffold_18	G	1898	G	G	T					T	T	G
scaffold_18	A	2074	G	G	A				A		A	G
scaffold_18	C	2264		C	T				T	T	T	C
scaffold_18	T	2368		C	T				T	T	T	C
scaffold_18	C	2430	T	T	C						C	T
scaffold_18	G	2790	T	T	G		G		G	G	G	T
scaffold_18	A	2893	G	G	A				A	A	A	G
scaffold_18	A	2970	G	G	A				A	A	A	G
scaffold_18	A	5744	G	G	A		A		A	A	A	G
scaffold_18	G	7566		A	G				G	G	G	A
scaffold_18	C	13300	C	C	T		T		T	T	T	C
scaffold_18	G	14214	G	G	A		A		A	A	A	G
scaffold_18	A	19122	T	T	A		A		A	A	A	T
scaffold_18	A	20771	T	T	A		A		A	A	A	T
scaffold_18	G	21555	A	A			G		G	G	G	A
scaffold_18	T	23372		T							--	T
scaffold_18	A	23901			A		A		A	A	A	--
scaffold_18	T	23916					T		T	T	T	--
scaffold_18	C	28453		C	T		T		T	T	T	C
scaffold_18	A	29116		T	A		A		A	A	A	T
scaffold_18	G	29341		G			T		T	T	T	G
scaffold_18	G	29350		G			A		A	A	A	G
scaffold_18	C	30994		T			C		C	C	C	T
scaffold_18	T	32953		T			C		C	C	C	T
scaffold_18	G	33070		A			G		G	G	G	A
scaffold_18	C	33333		C			T		T	T	T	C
scaffold_18	A	34115		A			G		G	G	G	A
scaffold_18	A	34488		T	A		A		A	A	A	T
scaffold_18	G	48080		A			G		G	G	G	A
scaffold_18	T	48702		C			T		T	T	T	C
scaffold_18	G	50539		G			A		A	A	A	G
scaffold_18	T	51463		C			T		T	T	T	C
scaffold_18	T	52928					C		C		C	--
scaffold_18	A	53973		A			G		G	G	G	A
scaffold_18	T	56130		C			T		T		T	C
scaffold_18	T	56926		T			C		C		C	T
scaffold_18	A	60038		A			C		C	C	C	A
scaffold_18	C	60442		T			C		C		C	T
scaffold_18	T	60935					T		T		T	--
scaffold_18	G	62109		G			A		A		A	G
scaffold_18	T	64163		A			T		T		T	A
scaffold_18	C	64383		C			T		T		T	C
scaffold_18	G	66514					A				A	--
scaffold_18	T	66932					C				C	--
scaffold_18	A	67501		G			A				A	G
scaffold_18	C	67587		C			T				T	C
scaffold_18	T	68091		C			T		T		T	C
scaffold_18	T	68205		C			T				T	C
scaffold_18	T	68278		C			T				T	C
scaffold_18	T	68349					T				T	--
scaffold_18	A	68485		G			A				A	G
scaffold_18	T	81674		T			C		C		C	T
scaffold_18	A	81917		A			G				G	A
scaffold_18	C	82018		T			C		C		C	T
scaffold_18	G	82047		T			G		G		G	T
scaffold_18	T	82157		T			C		C		C	T
scaffold_18	A	82314		G			A		A		A	G
scaffold_18	G	83801		A			G		G		G	A
scaffold_18	G	84093		A			G				G	A
scaffold_18	G	84411		A			G		G		G	A
scaffold_18	A	85025		C			A		A		A	C
scaffold_18	T	86102		T			C		C		C	T
scaffold_18	G	90654		A			G		G	G	G	A
scaffold_18	C	93528		C			T				T	C
scaffold_18	C	93791		T			C		C		C	T
scaffold_18	T	94172		C			T		T	T	T	C
scaffold_18	C	94665		T			C		C		C	T
scaffold_18	A	94711		G			A		A		A	G
scaffold_18	G	98752		A		G	G		G	G	G	A
scaffold_18	C	105469		C		T	T		T	T	T	C
scaffold_18	C	109906		T		C	C		C	C	C	T
scaffold_18	A	109915		T		A	A		A	A	A	T
scaffold_18	G	110257		G		T	T		T	T	T	G
scaffold_18	A	110264		A		C	C		C	C	C	A
scaffold_18	A	121826		T		A	A		A		A	T
scaffold_20	T	26901			G				G	G	G	--
scaffold_20	T	35860	T	T					C	C	C	T
scaffold_20	C	43149	C	C					G	G	G	C
scaffold_20	T	44254	T						A	A	A	T
scaffold_20	G	45736		A					G	G	G	A
scaffold_20	G	46544	A	A					G	G	G	A
scaffold_20	A	84838		T	A	A	A	A		A	A	T
scaffold_20	G	90623		A	G	G	G	G		G	G	A
scaffold_21	T	1009							A	A	A	--
scaffold_21	A	1482								T	T	--
scaffold_21	G	1941								A	A	--
scaffold_21	T	3091			A				A	A	A	--
scaffold_21	T	4352			C			C	C	C	C	--
scaffold_21	A	4391			G			G	G	G	G	--
scaffold_21	A	4436			T			T	T	T	T	--
scaffold_21	T	4914					C	C	C	C	C	--
scaffold_21	G	5488			A		A	A	A	A	A	--
scaffold_21	A	5653					G	G	G	G	G	--
scaffold_21	C	5659						T	T	T	T	--
scaffold_21	G	6700			T			T	T	T	T	--
scaffold_21	A	30822	C	C	A			A		A	A	C
scaffold_21	C	30925	A	A	C			C		C	C	A
scaffold_21	T	31776	C	C	T			T		T	T	C
scaffold_21	T	36001	C	C	T			T		T	T	C
scaffold_21	T	46318			C			C			C	--
scaffold_21	A	47699	T	T	A			A			A	T
scaffold_21	C	50182	T		C			C			C	T
scaffold_21	C	71201		T	C	C					C	T
scaffold_21	A	101826	G					G		G	G	--
scaffold_22	G	11238		G	A	A					A	G
scaffold_22	A	21942		A		T					T	A
scaffold_22	A	27687		T	T	T				T	T	--
scaffold_22	T	109123		C			C			C	C	--
scaffold_23	T	49545						G			G	--
scaffold_24	A	114088						A		A	A	--
scaffold_24	T	115640		C					T		T	C
scaffold_25	T	2613		A			T			T	T	A
scaffold_25	T	11458				A	A			A	A	--
scaffold_25	G	11531				A	A			A	A	--
scaffold_25	A	11959				G	G			G	G	--
scaffold_25	A	12189				A				A	A	--
scaffold_25	G	12397					A			A	A	--
scaffold_25	T	12530				C	C			C	C	--
scaffold_25	A	13428				G	G			G	G	--
scaffold_25	G	16356				A				A	A	--
scaffold_25	T	16688				T				T	T	--
scaffold_25	T	17292				C	C			C	C	--
scaffold_25	G	23748	G	G	A		A	A	A	A	A	G
scaffold_25	G	24711	G	G	A		A	A	A	A	A	G
scaffold_25	T	25685	C	C	T		T		T	T	T	C
scaffold_25	G	26198	A	A	G		G		G	G	G	A
scaffold_25	C	26609	C	C	A		A		A	A	A	C
scaffold_25	C	26952	C	C	T		T		T	T	T	C
scaffold_25	C	30409	C	C	T		T		T	T	T	C
scaffold_25	C	30416	C	C	T		T		T	T	T	C
scaffold_25	A	31284	G	G	A		A		A	A	A	G
scaffold_25	A	31800	G	G	A		A		A	A	A	G
scaffold_25	A	32467			A		A		A	A	A	--
scaffold_25	G	32945	G	G	A		A			A	A	G
scaffold_25	A	33352	T		A	A	A		A	A	A	T
scaffold_25	A	34618	A	A	G		G		G	G	G	A
scaffold_25	T	34686		C			T		T	T	T	C
scaffold_25	A	35302	T	T	A		A		A	A	A	T
scaffold_25	A	36981	T	T	A	A	A		A	A	A	T
scaffold_25	T	41128	C	C	T		T		T	T	T	C
scaffold_25	A	41295	T	T	A		A		A	A	A	T
scaffold_25	T	41307	T	T	A		A		A	A	A	T
scaffold_25	C	41440	T	T	C		C			C	C	T
scaffold_25	T	41783	C	C	T		T			T	T	C
scaffold_25	A	42973	A	A	T					T	T	A
scaffold_25	C	43279	A	A	C	C	C		C	C	C	A
scaffold_25	G	43385	A	A	G	G	G		G	G	G	A
scaffold_25	C	43511		T	C		C		C	C	C	T
scaffold_25	A	43638	G	G	A		A		A	A	A	G
scaffold_25	T	43770		A	T	T	T		T	T	T	A
scaffold_25	A	44016	A	A	G	G	G		G	G	G	A
scaffold_25	A	44196		A	G				G	G	G	A
scaffold_25	C	44211		C	T	T			T	T	T	C
scaffold_25	C	44229		C	A				A	A	A	C
scaffold_25	C	44888	C	C	T	T	T		T	T	T	C
scaffold_25	T	45688		A	T		T			T	T	A
scaffold_25	T	45736	A	A	T		T			T	T	A
scaffold_25	C	45757	A	A	C		C		C	C	C	A
scaffold_25	G	45826		A	G	G	G		G	G	G	A
scaffold_25	T	47549	T	T	C		C		C	C	C	T
scaffold_25	T	47639	T	T	C	C			C	C	C	T
scaffold_25	A	47717	G	G	A	A	A		A	A	A	G
scaffold_25	A	48014	T	T	A	A	A		A	A	A	T
scaffold_25	T	48072	C	C	T	T	T		T	T	T	C
scaffold_25	C	48079	T	T	C	C	C		C	C	C	T
scaffold_25	G	48142	A	A	G	G	G			G	G	A
scaffold_25	C	48307	T	T	C	C				C	C	T
scaffold_25	A	48517	A	A	T	T			T	T	T	A
scaffold_25	A	49359		G	A	A			A	A	A	G
scaffold_25	A	50188	A	A	G				G	G	G	A
scaffold_25	T	50665		C	T					T	T	C
scaffold_25	T	52021	T	T	A	A				A	A	T
scaffold_25	G	52067		A	A	A				A	A	--
scaffold_25	A	52337		A		G				G	G	A
scaffold_25	G	52499	G	G	A	A			A	A	A	G
scaffold_25	A	52932	T	T	A	A				A	A	T
scaffold_25	A	53315	A	A	G				G	G	G	A
scaffold_25	T	53390		C	T					T	T	C
scaffold_25	A	53617		G	A	A			A	A	A	G
scaffold_25	C	53646		T	C	C			C	C	C	T
scaffold_25	T	53760		T	C	C				C	C	T
scaffold_25	A	54651		A	G					G	G	A
scaffold_25	G	54895	G	G	A					A	A	G
scaffold_25	A	55341	A	A	G					G	G	A
scaffold_25	A	58880			T	T		T		T	T	--
scaffold_25	A	64328				A				A	A	--
scaffold_25	T	64961				C		C		C	C	--
scaffold_25	G	66437				T				T	T	--
scaffold_25	T	76186				A		A		A	A	--
scaffold_25	C	121441		C					T	T	T	C
scaffold_25	T	122649		C				T		T	T	C
scaffold_25	C	123174		T						C	C	T
scaffold_25	A	124462		A					G	G	G	A
scaffold_25	A	124595		G					A	A	A	G
scaffold_25	G	124646		A						G	G	A
scaffold_26	A	11354			G				G		G	--
scaffold_26	A	16239			G						G	--
scaffold_26	T	16387			A				A		A	--
scaffold_26	T	17437			A		A		A		A	--
scaffold_26	A	19495			G				G		G	--
scaffold_26	T	19849	C		T		T		T		T	C
scaffold_26	T	20188			A		A		A		A	--
scaffold_26	G	49914				A		A	A		A	--
scaffold_26	G	51962	A	A		G			G		G	A
scaffold_26	G	53234				G			G		G	--
scaffold_26	G	56569		T				G	G		G	T
scaffold_26	A	57980		A					T		T	A
scaffold_26	A	58225		A		T		T	T		T	A
scaffold_26	T	59741		C					T		T	C
scaffold_26	C	60096		T		C		C	C		C	T
scaffold_26	A	60451		G		A			A		A	G
scaffold_26	A	62308		A	G				G		G	A
scaffold_26	A	66043			T						T	--
scaffold_26	A	67143	A	A	G				G		G	A
scaffold_26	T	67698		T	C				C		C	T
scaffold_26	T	67962	C	C	T	T			T		T	C
scaffold_26	T	74552		T	C	C			C		C	T
scaffold_26	T	74659		T	A	A					A	T
scaffold_26	G	76885		A	G	G			G		G	A
scaffold_26	T	78805		T					A		A	T
scaffold_26	T	79488		T	C	C			C		C	T
scaffold_26	A	89223						T		T	T	--
scaffold_26	A	91320						T		T	T	--
scaffold_26	T	93505						T	T	T	T	--
scaffold_26	T	93512						T	T	T	T	--
scaffold_26	G	94104						A	A	A	A	--
scaffold_26	A	94117						G		G	G	--
scaffold_27	T	7314		C	T	T	T	T	T		T	C
scaffold_27	T	7515		T	G	G	G		G		G	T
scaffold_27	T	7547		T	A	A	A		A		A	T
scaffold_27	A	7577		A	T	T	T		T		T	A
scaffold_27	G	8587		T	G		G		G		G	T
scaffold_27	A	11209		A			G	G	G		G	A
scaffold_27	T	11623		C	T		T		T		T	C
scaffold_27	G	11638		A	G		G		G		G	A
scaffold_27	T	11950							C		C	--
scaffold_27	T	12603		C					T		T	C
scaffold_27	G	14418		A	G		G		G		G	A
scaffold_27	G	19525	A	A	G				G		G	A
scaffold_27	C	63794			T		T	T			T	--
scaffold_27	A	63822			G		G	G			G	--
scaffold_27	A	63838			T		T	T			T	--
scaffold_27	T	63984			A		A	A			A	--
scaffold_27	G	64026			A		A	A			A	--
scaffold_27	A	64412			G		G	G			G	--
scaffold_27	T	64513			C		C	C		C	C	--
scaffold_27	A	64580			G		G	G		G	G	--
scaffold_27	A	64603			C		C	C		C	C	--
scaffold_27	T	67609				A		A			A	--
scaffold_27	G	68041		A				G		G	G	A
scaffold_27	A	68623				T				T	T	--
scaffold_27	G	68892						A			A	--
scaffold_27	C	68915						T			T	--
scaffold_27	C	68961						A	A	A	A	--
scaffold_27	T	69012						T		T	T	--
scaffold_27	A	69059						A			A	--
scaffold_27	A	69105						A		A	A	--
scaffold_27	G	69685		A		G		G	G	G	G	A
scaffold_27	A	71592						A		A	A	--
scaffold_27	C	73017		C				T	T	T	T	C
scaffold_27	T	73094						T		T	T	--
scaffold_27	T	73133		C				T		T	T	C
scaffold_27	T	73252						C	C	C	C	--
scaffold_27	C	73270						T	T	T	T	--
scaffold_27	G	73340						T	T		T	--
scaffold_27	A	73438		A				G		G	G	A
scaffold_27	G	73481		G				A	A	A	A	G
scaffold_27	G	73576		G				A		A	A	G
scaffold_27	A	73777						A	A	A	A	--
scaffold_27	G	74008								C	C	--
scaffold_27	G	74455						G			G	--
scaffold_27	A	74896		A				T	T	T	T	A
scaffold_27	G	74944						T		T	T	--
scaffold_27	C	75184						C			C	--
scaffold_27	A	75201						A			A	--
scaffold_27	G	75284						T			T	--
scaffold_27	C	76302		T							--	T
scaffold_27	A	77575						G	G	G	G	--
scaffold_27	T	77610						A		A	A	--
scaffold_27	A	77624		A				G		G	G	A
scaffold_27	T	78770						C			C	--
scaffold_27	C	78861		T							--	T
scaffold_27	T	78924						T		T	T	--
scaffold_27	A	79092		A					G	G	G	A
scaffold_27	G	79161		A				G			G	A
scaffold_27	G	80416		A				G		G	G	A
scaffold_27	C	80443			C					C	C	--
scaffold_27	C	82292		C	T				T	T	T	C
scaffold_27	C	82512			C				C	C	C	--
scaffold_27	T	83061		T							--	T
scaffold_27	G	83461			G						G	--
scaffold_27	G	85084		A	G					G	G	A
scaffold_27	C	85181			C	C		C	C	C	C	--
scaffold_27	G	85213		A	G	G		G	G	G	G	A
scaffold_27	T	85300			C					C	C	--
scaffold_27	A	85580			A						A	--
scaffold_27	C	85886		T	C				C	C	C	T
scaffold_27	C	86154		T	C					C	C	T
scaffold_27	G	86541		A	G				G	G	G	A
scaffold_27	C	86548		T	C				C	C	C	T
scaffold_27	G	86695		G	A				A	A	A	G
scaffold_27	C	86778		C	T					T	T	C
scaffold_27	A	86879			G					G	G	--
scaffold_27	C	87766			T					T	T	--
scaffold_27	G	88078			T					T	T	--
scaffold_27	T	88228			T						T	--
scaffold_27	G	88276		A	G				G	G	G	A
scaffold_27	G	88321			G				G	G	G	--
scaffold_27	A	88596		A	G				G	G	G	A
scaffold_27	C	88655			T				T	T	T	--
scaffold_27	T	88907			C				C		C	--
scaffold_27	T	88972			C	C			C	C	C	--
scaffold_27	A	89283			G						G	--
scaffold_27	G	89616			G						G	--
scaffold_27	T	89743			G					G	G	--
scaffold_27	T	89820			C				C		C	--
scaffold_27	T	90082			C	C			C	C	C	--
scaffold_27	T	90125			C	C			C	C	C	--
scaffold_27	A	90364			G						G	--
scaffold_27	T	90424			C				C		C	--
scaffold_27	T	90443			G				G		G	--
scaffold_27	T	90494			C				C		C	--
scaffold_27	C	90532			A				A		A	--
scaffold_27	T	90820			T				T	T	T	--
scaffold_27	A	90865			A	A			A	A	A	--
scaffold_27	G	90880			G						G	--
scaffold_27	T	91331			T					T	T	--
scaffold_27	C	91409			T					T	T	--
scaffold_27	A	91529			G					G	G	--
scaffold_27	G	93324		G	A					A	A	G
scaffold_27	G	93402			G	G			G	G	G	--
scaffold_27	T	93492			T	T			T	T	T	--
scaffold_27	A	93724			T				T	T	T	--
scaffold_27	T	95185			T				T	T	T	--
scaffold_27	T	95468			C						C	--
scaffold_27	A	95741			A					A	A	--
scaffold_27	T	95887			T	T				T	T	--
scaffold_27	T	95892			T	T				T	T	--
scaffold_27	C	96866			T					T	T	--
scaffold_27	C	97082			A	A				A	A	--
scaffold_27	A	97247		C	A	A			A	A	A	C
scaffold_27	T	97501			A	A				A	A	--
scaffold_27	C	97580			C						C	--
scaffold_27	T	97618			T	T					T	--
scaffold_27	G	97815			A	A				A	A	--
scaffold_27	G	97824			A	A				A	A	--
scaffold_27	G	98424			G	G				G	G	--
scaffold_27	G	99405			A	A		A		A	A	--
scaffold_27	C	99435			T	T					T	--
scaffold_27	T	99454			A	A					A	--
scaffold_27	G	100347			T	T					T	--
scaffold_27	G	100381			A						A	--
scaffold_27	G	100638			A	A		A			A	--
scaffold_27	A	101296			G						G	--
scaffold_27	C	101722			T	T					T	--
scaffold_27	C	102306			A	A				A	A	--
scaffold_27	C	102329			T	T				T	T	--
scaffold_27	A	102355			C	C				C	C	--
scaffold_27	A	103606			G	G				G	G	--
scaffold_27	T	114161			A	A		A	A	A	A	--
scaffold_27	T	114258			G	G		G	G	G	G	--
scaffold_27	T	116100			C	C		C	C	C	C	--
scaffold_27	T	117948			C	C		C	C	C	C	--
scaffold_27	A	143199			G						G	--
scaffold_27	G	160897			G						G	--
scaffold_27	G	160942			A						A	--
scaffold_27	T	161064			A						A	--
scaffold_27	A	161070		G	G						G	--
scaffold_28	T	154096	G		G						G	--
scaffold_29	G	12430		A		G			G		G	A
scaffold_29	T	26908		T		C	C		C		C	T
scaffold_29	G	31535		A		G	G	G	G		G	A
scaffold_29	A	78937	A	A			G	G	G	G	G	A
scaffold_29	C	105060						T		T	T	--
scaffold_29	T	105105						A		A	A	--
scaffold_29	C	105308		T				C	C	C	C	T
scaffold_29	A	105784					A	A		A	A	--
scaffold_29	A	106269					T	T	T	T	T	--
scaffold_29	A	111953		A				G		G	G	A
scaffold_29	A	119398						T		T	T	--
scaffold_29	C	119637						T		T	T	--
scaffold_29	C	119674						T		T	T	--
scaffold_29	T	121348						T		T	T	--
scaffold_29	G	134611					G	G		G	G	--
scaffold_29	G	141999					A			A	A	--
scaffold_29	T	142005					A			A	A	--
scaffold_29	C	142131					C			C	C	--
scaffold_29	T	143716					T			T	T	--
scaffold_29	T	143858					C			C	C	--
scaffold_29	G	143905					T			T	T	--
scaffold_29	T	144579					G			G	G	--
scaffold_29	C	145136					A			A	A	--
scaffold_29	G	145178	G				A			A	A	G
scaffold_29	T	148056					C			C	C	--
scaffold_29	A	149969					A		A	A	A	--
scaffold_29	C	150350					C	C	C	C	C	--
scaffold_29	C	154531					C	C		C	C	--
scaffold_29	A	154548					A	A		A	A	--
scaffold_29	G	154720					G	G	G	G	G	--
scaffold_29	T	157828				T	T			T	T	--
scaffold_30	C	4058			T	T					T	--
scaffold_30	C	92104								A	A	--
scaffold_30	G	94380								C	C	--
scaffold_30	A	97350					A			A	A	--
scaffold_30	C	98735								T	T	--
scaffold_30	A	100794					G			G	G	--
scaffold_30	T	104849								C	C	--
scaffold_30	A	114590								T	T	--
scaffold_31	G	661		A				G		G	G	A
scaffold_31	C	66706	C	A				C			C	A
scaffold_31	T	66731	T	C			T	T	T		T	C
scaffold_31	T	75077					T			C	T	C
scaffold_31	A	100775		A	G	G	G		G	G	G	A
scaffold_31	G	103347			A	A	A				A	--
scaffold_32	A	11877	T		A			A	A	A	A	T
scaffold_32	T	14300	C		T			T	T	T	T	C
scaffold_32	A	40852		T						A	A	T
scaffold_32	A	41295								A	A	--
scaffold_32	T	41365			C					C	C	--
scaffold_32	C	41374		C	T					T	T	C
scaffold_32	C	41623								C	C	--
scaffold_32	T	41712		C						T	T	C
scaffold_32	G	41809							A	A	A	--
scaffold_32	C	41885	C	C							--	C
scaffold_32	G	41914	G	G					A		A	G
scaffold_32	A	46029	G	G	A				A	A	A	G
scaffold_32	A	46042	T	T	A				A	A	A	T
scaffold_32	G	46304		G							--	G
scaffold_32	G	46328		G							--	G
scaffold_32	G	46534		G							--	G
scaffold_32	C	46613		C					T		T	C
scaffold_32	T	46913		A						T	T	A
scaffold_32	G	47044		G	A					A	A	G
scaffold_32	A	47573		G							--	G
scaffold_32	G	47641		A						G	G	A
scaffold_32	G	48092		A						G	G	A
scaffold_32	G	48174		G					A	A	A	G
scaffold_32	G	49141		A							--	A
scaffold_32	G	49180		A							--	A
scaffold_32	T	49438		T						C	C	T
scaffold_32	A	49454		A						G	G	A
scaffold_32	T	49731	G	G					T	T	T	G
scaffold_32	C	49755	T	T						C	C	T
scaffold_32	T	49801		A						T	T	A
scaffold_32	G	50254		A						G	G	A
scaffold_32	C	50388		C							--	C
scaffold_32	A	50413		A	T						T	A
scaffold_32	C	50504		C							--	C
scaffold_32	T	50655		C							--	C
scaffold_32	T	53341		T							--	T
scaffold_32	A	62935		A						G	G	A
scaffold_32	A	65922		A			T				T	A
scaffold_33	T	545	C			C	T				T	C
scaffold_33	A	7825			G		G		G	G	G	--
scaffold_33	A	19579			G		G	G	G	G	G	--
scaffold_33	C	20366			A	A	A			A	A	--
scaffold_33	A	26167			T		T		T	T	T	--
scaffold_33	T	56215			T		T		T	T	T	--
scaffold_33	G	56379			G		G		G	G	G	--
scaffold_33	T	71936			A		A		A	A	A	--
scaffold_33	G	76664			T		T		T	T	T	--
scaffold_34	G	25382				A				G	A	G
scaffold_34	C	76235		C	T		T				T	C
scaffold_34	T	76278		T	A		A				A	T
scaffold_34	G	80350		G	T		T	T			T	G
scaffold_34	C	81167		C	T		T	T			T	C
scaffold_34	C	81481		C	A		A	A			A	C
scaffold_34	T	84208		A	T		T	T			T	A
scaffold_34	T	87888		C	T		T	T	T	T	T	C
scaffold_34	T	88397		A	T		T	T	T	T	T	A
scaffold_34	T	88983		A	T		T	T		T	T	A
scaffold_34	T	89727		C	T		T	T		T	T	C
scaffold_34	T	89858		C	T		T	T		T	T	C
scaffold_34	T	92924		T	C		C	C	C	C	C	T
scaffold_34	T	96800		T	C		C	C		C	C	T
scaffold_34	G	96856		G			A	A		A	A	G
scaffold_34	T	96931		T	C		C		T	C	C	T
scaffold_34	A	102063		A	G						G	A
scaffold_34	A	103745		G	A		A	A		A	A	G
scaffold_34	G	103895		A	G		G	G		G	G	A
scaffold_34	G	104290		A	G		G	G		G	G	A
scaffold_34	T	104315		C	T		T	T		T	T	C
scaffold_34	C	104411		T	C		C			C	C	T
scaffold_34	A	109764		C	A		A	A	A	A	A	C
scaffold_34	C	111919		C	T		T		T	T	T	C
scaffold_34	A	113678		G	A					A	A	G
scaffold_34	C	113717		T	C		C		C	C	C	T
scaffold_34	G	114193		A	G	G	G			G	G	A
scaffold_34	A	119761		A	G			G	G	G	G	A
scaffold_34	C	120966		T	C			C	C	C	C	T
scaffold_34	T	121124		A	T					T	T	A
scaffold_34	T	124533		T	C	C				C	C	T
scaffold_35	T	33429						T			T	--
scaffold_35	C	41542		C	T					T	T	C
scaffold_35	T	45242		T	A						A	T
scaffold_35	T	84630		T	A	A				A	A	T
scaffold_35	A	137291			G		G			G	G	--
scaffold_36	A	9054								A	A	--
scaffold_36	T	13693		C	T					T	T	C
scaffold_36	T	45612		T	C	C	C				C	T
scaffold_36	G	47633		G	T	T	T				T	G
scaffold_36	C	67308		T	C		C		C		C	T
scaffold_36	C	67873		A	C		C		C	C	C	A
scaffold_36	T	68621		G	T		T		T		T	G
scaffold_36	T	68824		T	A		A				A	T
scaffold_36	T	68839		T	C		C				C	T
scaffold_36	T	69518		T	A		A		A		A	T
scaffold_36	A	69823		A	T		T				T	A
scaffold_36	T	69833		T	C		C				C	T
scaffold_36	A	70461		A	C		C		C		C	A
scaffold_36	A	76550			T		T				T	--
scaffold_36	T	97997			T		T				T	--
scaffold_36	T	98031			T		T				T	--
scaffold_36	T	109497			T		T				T	--
scaffold_37	T	39983	T	T	C	C			C	C	C	T
scaffold_37	A	67599		T	A				A		A	T
scaffold_37	C	70393	A	A	C				C		C	A
scaffold_37	A	70537	A	A					T		T	A
scaffold_37	C	72371	T	T	C				C		C	T
scaffold_37	C	72426	T	T	C				C		C	T
scaffold_37	G	72455	A	A	G				G		G	A
scaffold_37	A	73070	T	T	A				A		A	T
scaffold_37	C	74863	C	C	T	T			T		T	C
scaffold_37	A	75604	G	G	A	A			A		A	G
scaffold_37	A	75640	T	T	A	A			A		A	T
scaffold_37	G	75647	A	A	G	G		G	G		G	A
scaffold_37	G	75717	A	A	G	G		G	G		G	A
scaffold_37	C	76633	C	C	T	T			T		T	C
scaffold_37	G	76670	G	G	T	T			T		T	G
scaffold_37	C	76935	T	T					C		C	T
scaffold_37	T	77038	A	A					T		T	A
scaffold_37	T	77059	C	C	T				T		T	C
scaffold_37	G	77139	A	A	G				G		G	A
scaffold_37	C	77204	T	T	C				C		C	T
scaffold_37	C	77242	T	T	C				C		C	T
scaffold_37	A	79504							T		T	--
scaffold_37	A	80675	A		C	C					C	A
scaffold_37	G	95678	G	G	A	A			A		A	G
scaffold_37	T	100801	T								--	T
scaffold_37	T	100812	T	T							--	T
scaffold_37	T	100823	T	T							--	T
scaffold_37	C	100846	C		T						T	C
scaffold_37	T	100866	T		C						C	T
scaffold_37	A	100882	A		G						G	A
scaffold_37	T	100904	T		C						C	T
scaffold_37	T	101127	T	T	C				C		C	T
scaffold_37	T	101267	A								--	A
scaffold_37	A	101293	G								--	G
scaffold_37	G	101362	G								--	G
scaffold_37	C	101371	C								--	C
scaffold_37	T	101393	T								--	T
scaffold_37	A	101436	A								--	A
scaffold_38	G	110770				A				A	A	--
scaffold_38	A	117330				G					G	--
scaffold_38	A	117511				G				G	G	--
scaffold_38	A	121596				G		G	G	G	G	--
scaffold_38	G	121616				A		A	A	A	A	--
scaffold_38	A	122935	C			A				A	A	C
scaffold_38	A	123049				G				G	G	--
scaffold_38	G	123065	G			A				A	A	G
scaffold_38	G	123090	G			A		A		A	A	G
scaffold_38	C	123210	C			T		T		T	T	C
scaffold_38	G	123235				T		T			T	--
scaffold_38	G	123406				A				A	A	--
scaffold_38	G	123445	G			A				A	A	G
scaffold_38	T	123521				T				T	T	--
scaffold_38	T	123536				T				T	T	--
scaffold_38	T	123673				T		T		T	T	--
scaffold_38	G	123835	G			A		A		A	A	G
scaffold_38	C	123845	C			T		T		T	T	C
scaffold_38	G	123932				A		A		A	A	--
scaffold_38	A	123937				G		G		G	G	--
scaffold_38	T	123966				C		C		C	C	--
scaffold_38	A	124004	A			C		C		C	C	A
scaffold_38	T	124085	T			C		C		C	C	T
scaffold_38	C	124110	C			T		T		T	T	C
scaffold_38	T	124136				C		C		C	C	--
scaffold_38	A	124539				G		G		G	G	--
scaffold_38	C	124827	C			T		T		T	T	C
scaffold_38	A	125016				A		A		A	A	--
scaffold_38	G	125285				G				G	G	--
scaffold_38	T	125847				A				A	A	--
scaffold_38	T	126460				A					A	--
scaffold_38	A	128754	A			G		G		G	G	A
scaffold_38	G	128884	T			G		G		G	G	T
scaffold_38	A	130983				G		G		G	G	--
scaffold_38	A	131238				A		A		A	A	--
scaffold_38	A	132302				G		G		G	G	--
scaffold_38	T	132876	C			T		T		T	T	C
scaffold_38	T	132937	C			T		T		T	T	C
scaffold_39	T	11147						C		C	C	--
scaffold_39	A	19807		G				A		A	A	G
scaffold_39	T	25939		C				T		T	T	C
scaffold_39	T	29067		T				A		A	A	T
scaffold_39	T	30390		A				T		T	T	A
scaffold_39	G	34099		G				A		A	A	G
scaffold_39	C	34115		C				T		T	T	C
scaffold_39	T	43760	C	C	T			T		T	T	C
scaffold_39	A	43799	G	G	A			A		A	A	G
scaffold_39	T	43864	A	A	T			T		T	T	A
scaffold_39	G	46051	G	G	A					A	A	G
scaffold_39	A	46122	T	T	A					A	A	T
scaffold_39	T	46494		C	T					T	T	C
scaffold_39	T	46648	T	T	C					C	C	T
scaffold_39	T	46661	T	T	C					C	C	T
scaffold_39	A	46815	T	T	A			A		A	A	T
scaffold_39	C	47232	C	C	T			T	T	T	T	C
scaffold_39	A	48409	T	T	A			A		A	A	T
scaffold_39	T	48673	T	T	C					C	C	T
scaffold_39	T	49945	C	C	T		T	T		T	T	C
scaffold_39	A	50724	C	C	A			A		A	A	C
scaffold_39	G	50774	A	A	G					G	G	A
scaffold_39	A	51388	T	T	A		A	A		A	A	T
scaffold_39	A	51407	T	T	A		A	A		A	A	T
scaffold_39	T	53373	T	T				A		A	A	T
scaffold_39	G	53817	A	A	G					G	G	A
scaffold_39	T	53892	T	T	C			C		C	C	T
scaffold_39	A	54071	T	T	A	A		A		A	A	T
scaffold_39	C	54282	C	C	A					A	A	C
scaffold_39	C	54344	C	C	T						T	C
scaffold_39	A	55853	A	A	G	G		G		G	G	A
scaffold_39	T	61594	C	C	T	T	T			T	T	C
scaffold_39	G	61932	A	A	G	G		G		G	G	A
scaffold_39	G	62282	A	A	G	G		G		G	G	A
scaffold_39	A	62422	A	A	T	T		T		T	T	A
scaffold_39	A	62569	T	T	A	A				A	A	T
scaffold_39	C	62822	T	T	C	C		C		C	C	T
scaffold_39	G	63162	A		G	G		G		G	G	A
scaffold_39	A	63326	A	A	G	G				G	G	A
scaffold_39	A	63719	C	C	A	A	A	A		A	A	C
scaffold_39	T	77794			T			T			T	--
scaffold_39	A	96104		A			T			T	T	A
scaffold_39	C	96244			C	C	C			C	C	--
scaffold_39	A	96991		A	T	T	T			T	T	A
scaffold_39	A	97078		A		G	G			G	G	A
scaffold_39	C	97177		C		G	G			G	G	C
scaffold_39	C	97683		T		C	C			C	C	T
scaffold_39	T	98336		A		T	T		T	T	T	A
scaffold_39	C	99342		T		C	C		C	C	C	T
scaffold_39	T	100132		T	A	A	A		A	A	A	T
scaffold_39	C	100206		T	C	C	C		C	C	C	T
scaffold_39	T	100389		G	T	T	T		T	T	T	G
scaffold_41	G	8574					A			A	A	--
scaffold_41	G	47307						T		T	T	--
scaffold_41	C	47414		T			C	C	C	C	C	T
scaffold_41	C	47740		C		T	T	T	T	T	T	C
scaffold_41	C	47936		A				C	C	C	C	A
scaffold_41	A	48040		G			A	A	A	A	A	G
scaffold_41	T	49888		C		T	T	T	T	T	T	C
scaffold_41	A	50607		A			T	T	T	T	T	A
scaffold_41	T	52005				T	T	T	T	T	T	--
scaffold_41	C	52652		G			C	C	C	C	C	G
scaffold_41	A	52658		G		A	A	A	A	A	A	G
scaffold_41	C	53264		C		T	T	T	T	T	T	C
scaffold_41	T	53289		T		C	C	C	C	C	C	T
scaffold_41	G	53547		T		G	G	G	G	G	G	T
scaffold_41	A	54309		G		A	A	A	A	A	A	G
scaffold_41	C	54361		A	C	C	C	C	C	C	C	A
scaffold_41	A	54415		C		A	A	A	A	A	A	C
scaffold_41	T	54425		G		T	T	T	T	T	T	G
scaffold_41	G	54436		T			G	G	G	G	G	T
scaffold_41	A	54491		T		A	A	A	A	A	A	T
scaffold_41	A	54675		A		T	T	T	T	T	T	A
scaffold_41	T	54684		T		C	C	C	C	C	C	T
scaffold_41	A	54719		A	G	G	G	G	G	G	G	A
scaffold_41	G	54733		G	A	A	A	A	A	A	A	G
scaffold_41	T	54744		T	C	C	C	C	C	C	C	T
scaffold_41	A	54846		A	T	T	T	T	T	T	T	A
scaffold_41	C	54936		T		C	C	C	C	C	C	T
scaffold_41	G	54976				G	G	G	G	G	G	--
scaffold_41	G	54981				G	G	G	G	G	G	--
scaffold_41	C	55165		A		C	C	C	C	C	C	A
scaffold_41	G	55172		T		G		G	G	G	G	T
scaffold_41	C	55191		T		C	C	C	C	C	C	T
scaffold_41	G	55582		T	G	G	G	G	G	G	G	T
scaffold_41	C	56129		T	C	C	C	C	C	C	C	T
scaffold_41	C	56155		A	C	C	C	C	C	C	C	A
scaffold_41	T	120956			C						C	--
scaffold_41	T	142380			A					A	A	--
scaffold_41	T	173710	C								--	C
scaffold_41	G	174115			G					G	G	--
scaffold_41	G	174404	G		T			T		T	T	G
scaffold_42	T	85077		C	T					T	T	C
scaffold_42	C	85598		T	C					C	C	T
scaffold_42	T	85690		C	T					T	T	C
scaffold_42	G	85761		A	G					G	G	A
scaffold_42	C	85768		T	C					C	C	T
scaffold_42	T	85923		C	T					T	T	C
scaffold_42	A	85957		T	A					A	A	T
scaffold_42	G	97015		G	A					A	A	G
scaffold_44	T	8251								A	A	--
scaffold_44	G	17935								T	T	--
scaffold_44	C	22043								C	C	--
scaffold_44	G	22749								A	A	--
scaffold_44	G	28662								A	A	--
scaffold_44	T	30335								C	C	--
scaffold_44	A	31793								T	T	--
scaffold_44	C	31798								T	T	--
scaffold_44	A	32357								A	A	--
scaffold_46	G	17294			G			G		G	G	--
scaffold_46	C	17312			C			C		C	C	--
scaffold_46	C	17363			C			C		C	C	--
scaffold_46	G	17787			A			A		A	A	--
scaffold_46	T	18122			C			C		C	C	--
scaffold_46	C	18244			T			T		T	T	--
scaffold_46	A	24745			G			G	G	G	G	--
scaffold_46	G	24931			A			A	A	A	A	--
scaffold_46	G	35353			G			G	G	G	G	--
scaffold_46	T	53386			A					A	A	--
scaffold_46	A	89117			T				T	T	T	--
scaffold_46	C	131362		T			C	C	C		C	T
scaffold_46	T	131599		C			T	T	T		T	C
scaffold_46	G	132258		T			G	G	G		G	T
scaffold_46	T	132495		C			T	T	T		T	C
scaffold_46	T	132508		C			T	T	T		T	C
scaffold_46	G	161805	A		G		G		G		G	A
scaffold_46	T	161828	C		T		T		T		T	C
scaffold_46	G	163831	G		A				A		A	G
scaffold_46	C	164562	C		T		T				T	C
scaffold_46	T	165049	G		T		T		T		T	G
scaffold_46	A	165143	A		T		T		T		T	A
scaffold_46	A	165149	A		T		T		T		T	A
scaffold_46	T	165218	T		C						C	T
scaffold_46	T	165241	T		A		A				A	T
scaffold_46	G	165528	C		G	G			G		G	C
scaffold_46	C	165588	T		C				C		C	T
scaffold_46	C	165620	T		C				C		C	T
scaffold_46	T	165671	T		C		C		C		C	T
scaffold_46	G	165705	G		A				A		A	G
scaffold_46	A	165737	A		G				G		G	A
scaffold_46	C	175831			T						T	--
scaffold_46	G	176874			G			G			G	--
scaffold_46	G	177294			G			G	G		G	--
scaffold_46	T	178689			T	T		T	T		T	--
scaffold_46	T	181966		C							--	C
scaffold_46	A	182137		T	A		A				A	T
scaffold_47	C	13376			T		T				T	--
scaffold_47	G	25724					A				A	--
scaffold_47	C	110848							T	T	T	--
scaffold_47	C	111730						T	T	T	T	--
scaffold_47	A	112202						G	G	G	G	--
scaffold_47	T	119811							C		C	--
scaffold_47	C	122411				T		T		T	T	--
scaffold_47	T	122472				C		C		C	C	--
scaffold_47	G	127972				A		A		A	A	--
scaffold_47	C	142622				T		T		T	T	--
scaffold_49	T	30092								A	A	--
scaffold_49	T	50193		C	T	T			T	T	T	C
scaffold_49	T	91525			T	T	T				T	--
scaffold_49	C	91619		T	C	C	C				C	T
scaffold_49	A	91715			A	A	A				A	--
scaffold_49	T	93938			C	C	C		C	C	C	--
scaffold_49	A	96978	G		A	A	A		A	A	A	G
scaffold_49	G	98939	A		G	G	G		G	G	G	A
scaffold_50	A	90602	G			A				A	A	G
scaffold_50	T	92785								T	T	--
scaffold_50	T	94833								A	A	--
scaffold_50	C	96324				T				T	T	--
scaffold_50	A	114201				T				T	T	--
scaffold_50	G	115179				T				T	T	--
scaffold_50	T	116131								A	A	--
scaffold_50	A	116267								G	G	--
scaffold_50	G	118853		G		A	A		A	A	A	G
scaffold_50	A	119412								A	A	--
scaffold_50	C	119538							C	C	C	--
scaffold_50	C	119642		C		A	A		A	A	A	C
scaffold_50	A	120038							A	A	A	--
scaffold_50	T	120214		T		C	C		C	C	C	T
scaffold_50	C	120424							T	T	T	--
scaffold_50	C	120802		T		C	C		C	C	C	T
scaffold_50	A	120983		G			A		A	A	A	G
scaffold_50	T	120991		C			T		T	T	T	C
scaffold_50	G	121038		A			G		G	G	G	A
scaffold_50	G	121054		C			G		G	G	G	C
scaffold_50	G	121073		T			G		G	G	G	T
scaffold_50	T	121132					T		T	T	T	--
scaffold_50	T	121243		A		T			T	T	T	A
scaffold_50	T	121520		T			A		A	A	A	T
scaffold_50	A	121526		A			G		G	G	G	A
scaffold_50	A	121806		G					A	A	A	G
scaffold_50	A	121872		A			G		G	G	G	A
scaffold_50	C	122269		T			C		C	C	C	T
scaffold_51	A	23226	A		G						G	A
scaffold_51	G	39265	G		A			A		A	A	G
scaffold_51	T	43807		T	C			C		C	C	T
scaffold_51	G	49528					G		G		G	--
scaffold_51	A	50461		A	T	T			T	T	T	A
scaffold_51	T	51760		A	T	T			T	T	T	A
scaffold_51	A	75318			T		T				T	--
scaffold_51	A	85655				G					G	--
scaffold_51	G	95904		G		A			A	A	A	G
scaffold_51	A	173344				A			A	A	A	--
scaffold_51	A	182538	G	G	A	A	A		A	A	A	G
scaffold_51	C	183952	A	A	C	C	C		C	C	C	A
scaffold_51	G	184944	A	A	G	G	G		G	G	G	A
scaffold_51	G	185091	G	G	T	T	T		T	T	T	G
scaffold_51	A	186761	A	A	G	G	G		G	G	G	A
scaffold_51	A	191450	A	A	T	T	T		T	T	T	A
scaffold_51	T	191886	T		C	C	C		C		C	T
scaffold_51	T	192007	C		T	T	T		T	T	T	C
scaffold_52	T	3500		C		T			T	T	T	C
scaffold_52	T	5530						C			C	--
scaffold_52	C	5633		C						T	T	C
scaffold_52	T	7297		T		C					C	T
scaffold_52	C	7387		C		A					A	C
scaffold_52	T	7432		T		G			G		G	T
scaffold_52	G	9959		G		A				A	A	G
scaffold_52	C	10551		T		C				C	C	T
scaffold_52	C	10567		A		C				C	C	A
scaffold_52	A	10647		A		G			G	G	G	A
scaffold_52	A	13589		A		T				T	T	A
scaffold_52	C	33686		C		T				T	T	C
scaffold_52	C	37852		T		C				C	C	T
scaffold_52	G	38263				G				G	G	--
scaffold_52	G	48215		G		C				C	C	G
scaffold_52	A	48801		G		A				A	A	G
scaffold_52	A	63662			G	G	G			G	G	--
scaffold_52	G	80491			G	G	G		G		G	--
scaffold_54	T	10547			A	A	A				A	--
scaffold_54	G	10643			A	A	A				A	--
scaffold_54	T	22195		T							--	T
scaffold_54	A	32457		A						G	G	A
scaffold_54	A	33588		A		T				T	T	A
scaffold_54	C	33650		C						T	T	C
scaffold_54	T	33852		C		T				T	T	C
scaffold_54	C	35404		T		C				C	C	T
scaffold_54	T	37120		A						T	T	A
scaffold_54	T	37181		A		T				T	T	A
scaffold_54	G	37268		G		T				T	T	G
scaffold_54	G	37299		G						A	A	G
scaffold_54	A	37494		G		A				A	A	G
scaffold_54	G	38178		A		G				G	G	A
scaffold_54	C	38232		T		C				C	C	T
scaffold_54	T	38249		C		T				T	T	C
scaffold_54	C	38421		T		C				C	C	T
scaffold_54	C	39142		C						T	T	C
scaffold_54	A	39312		T						A	A	T
scaffold_54	T	40183		A		T				T	T	A
scaffold_54	A	40317		A						G	G	A
scaffold_54	A	40452		C						A	A	C
scaffold_54	A	40701		G						A	A	G
scaffold_54	T	41007		G							--	G
scaffold_54	G	41694		A						G	G	A
scaffold_54	A	42906								G	G	--
scaffold_54	C	47186		C						A	A	C
scaffold_54	A	47410		A						G	G	A
scaffold_54	A	47510		A						G	G	A
scaffold_54	C	64399		T		C	C	C		C	C	T
scaffold_54	T	64500		C			T	T		T	T	C
scaffold_54	A	64575		T			A	A		A	A	T
scaffold_54	G	64852		T		G	G			G	G	T
scaffold_54	G	65055		A		G	G			G	G	A
scaffold_54	C	65072		A		C	C			C	C	A
scaffold_54	G	65138		A		G	G	G		G	G	A
scaffold_54	A	65873		G		A	A			A	A	G
scaffold_54	G	65880		A			G			G	G	A
scaffold_54	G	65969		G			T			T	T	G
scaffold_54	G	66036		G			T	T		T	T	G
scaffold_54	T	66273		C			T				T	C
scaffold_54	A	66643		T			A			A	A	T
scaffold_54	T	67835		C			T			T	T	C
scaffold_54	G	67860		T		G	G			G	G	T
scaffold_54	G	68294		T		G	G			G	G	T
scaffold_54	T	68311		C		T	T			T	T	C
scaffold_54	C	68856		C			T				T	C
scaffold_54	T	68991					G				G	--
scaffold_54	A	70040		T		T	T			T	T	--
scaffold_54	T	70071		A		T	T			T	T	A
scaffold_54	A	70318		A		C	C			C	C	A
scaffold_54	G	70594		G		A	A			A	A	G
scaffold_54	G	71981		G		A	A			A	A	G
scaffold_54	G	72764		G		A	A			A	A	G
scaffold_54	T	73077				C					C	--
scaffold_54	C	73176		T		C	C			C	C	T
scaffold_54	C	73250		C		G	G			G	G	C
scaffold_54	T	73286		T		A	A			A	A	T
scaffold_54	C	73322		C		A	A			A	A	C
scaffold_54	C	73331		C		T	T			T	T	C
scaffold_54	C	79794	C	C		A	A			A	A	C
scaffold_54	A	82729		C	A		A	A	A	A	A	C
scaffold_54	T	82785		A	T		T	T	T		T	A
scaffold_56	T	1970								A	A	--
scaffold_56	A	39586					A				A	--
scaffold_56	G	39959	G				A				A	G
scaffold_56	A	54874		T	A		A	A	A	A	A	T
scaffold_56	A	56578		C	A		A	A	A	A	A	C
scaffold_56	A	80648		T	T			T	T	T	T	--
scaffold_57	C	1841			T	T				T	T	--
scaffold_57	C	2589			A	A				A	A	--
scaffold_57	C	4062			T	T				T	T	--
scaffold_57	G	4482			T	T				T	T	--
scaffold_57	G	4496			A	A				A	A	--
scaffold_57	C	4689			T	T				T	T	--
scaffold_57	G	6068			A	A				A	A	--
scaffold_57	A	6078			T	T				T	T	--
scaffold_57	T	6110			C	C				C	C	--
scaffold_57	C	8048			T	T				T	T	--
scaffold_57	G	8065			C	C				C	C	--
scaffold_57	C	8101			T	T				T	T	--
scaffold_57	G	8419			A	A				A	A	--
scaffold_57	T	10805			G	G			G	G	G	--
scaffold_57	A	12008							T	T	T	--
scaffold_57	G	12334			A	A			A	A	A	--
scaffold_57	A	15816			C	C			C	C	C	--
scaffold_57	T	21699			A	A			A	A	A	--
scaffold_57	C	21935			T	T		T	T	T	T	--
scaffold_57	G	21943			A	A		A	A	A	A	--
scaffold_57	G	34495			A	A		A	A	A	A	--
scaffold_57	G	39025			A	A	A	A	A	A	A	--
scaffold_57	G	42378			A	A	A	A	A	A	A	--
scaffold_57	A	42383			G	G	G	G	G	G	G	--
scaffold_57	C	43589			T		T	T	T	T	T	--
scaffold_57	G	45050			A	A	A	A		A	A	--
scaffold_57	A	48473			T	T	T	T	T	T	T	--
scaffold_57	T	48583			C	C	C	C	C	C	C	--
scaffold_57	T	48723			A	A	A	A	A	A	A	--
scaffold_57	T	49184			C	C			C	C	C	--
scaffold_57	A	49887			T	T	T	T	T	T	T	--
scaffold_57	T	49893			C	C	C	C	C	C	C	--
scaffold_57	T	49995			A	A			A	A	A	--
scaffold_57	C	50002			T	T			T	T	T	--
scaffold_57	C	50026			T	T			T	T	T	--
scaffold_57	G	50357			T	T	T		T	T	T	--
scaffold_57	A	50367			T	T	T		T	T	T	--
scaffold_58	T	23655			A					A	A	--
scaffold_58	A	28416					A				A	--
scaffold_58	T	58485		A		T			T		T	A
scaffold_58	G	65560		G		A			A		A	G
scaffold_58	T	79330			C			C	C	C	C	--
scaffold_58	T	80729			C		C	C	C	C	C	--
scaffold_58	A	80775			G			G	G	G	G	--
scaffold_58	C	81331			T			T	T	T	T	--
scaffold_58	G	86105			A		A	A	A	A	A	--
scaffold_58	A	86198			T			T	T	T	T	--
scaffold_58	C	86246			T		T	T	T	T	T	--
scaffold_58	A	88289			C			C	C	C	C	--
scaffold_59	A	4694	G	G					G	G	G	--
scaffold_59	A	7974	T	T					T	T	T	--
scaffold_59	G	31091	T		G		G			G	G	T
scaffold_59	A	58065					T	T		T	T	--
scaffold_59	T	81726		C			T	T	T	T	T	C
scaffold_59	T	94589		T	A	A	A	A	A	A	A	T
scaffold_59	A	96638		A	C	C	C	C	C	C	C	A
scaffold_60	T	10135		C							--	C
scaffold_60	A	11919		A							--	A
scaffold_60	C	13189		C	T			T			T	C
scaffold_60	A	13250	A	A	T		T	T			T	A
scaffold_60	A	13305	A	A	G		G		G		G	A
scaffold_60	T	13372		A	T		T	T	T		T	A
scaffold_60	G	13973		A	G		G				G	A
scaffold_60	T	28371	A	A	T	T	T		T	T	T	A
scaffold_60	T	30184		G	T						T	G
scaffold_60	T	60061			G	G	G		G	G	G	--
scaffold_60	T	75552			T	T		T	T	T	T	--
scaffold_60	T	81822		C	T	T		T	T	T	T	C
scaffold_60	C	81845			C	C		C	C	C	C	--
scaffold_60	A	84317			T	T		T		T	T	--
scaffold_60	T	86193			G	G		G		G	G	--
scaffold_60	C	88541		C	A	A	A			A	A	C
scaffold_60	A	92954		A			G			G	G	A
scaffold_60	C	94500		T		C	C				C	T
scaffold_60	C	94572		T	C		C			C	C	T
scaffold_60	G	94853		G	A		A			A	A	G
scaffold_60	C	94872		C	T		T			T	T	C
scaffold_60	G	95278		A		G	G			G	G	A
scaffold_60	C	95494		T	C	C	C			C	C	T
scaffold_60	A	95680		A	G		G			G	G	A
scaffold_60	A	95753		G	A		A	A		A	A	G
scaffold_60	G	95814		A		G	G	G		G	G	A
scaffold_60	C	95831		T		C	C	C		C	C	T
scaffold_60	A	95866		G	A	A	A	A		A	A	G
scaffold_60	G	95925		A		G		G		G	G	A
scaffold_60	G	96044		G	A	A	A			A	A	G
scaffold_60	G	96057		G	A	A	A			A	A	G
scaffold_60	T	96146		T	C	C	C	C		C	C	T
scaffold_60	A	96463		C	A	A					A	C
scaffold_60	T	97464		T	C	C	C			C	C	T
scaffold_60	T	97491		T	C	C	C			C	C	T
scaffold_60	T	98109		T	C	C	C			C	C	T
scaffold_61	A	30109		G	A	A			A		A	G
scaffold_61	A	34355		A	T						T	A
scaffold_61	G	36336		G	A	A			A		A	G
scaffold_61	A	37923		G	A	A			A	A	A	G
scaffold_61	T	38092		C	T	T	T		T		T	C
scaffold_61	A	38097		C	A	A	A		A		A	C
scaffold_61	A	38115		T	A	A			A		A	T
scaffold_61	T	41617		T	A						A	T
scaffold_61	T	45142		T	C				C		C	T
scaffold_61	T	60400		T	C	C	C				C	T
scaffold_61	T	61261		C	T	T	T				T	C
scaffold_61	G	64328		A	G	G	G				G	A
scaffold_62	G	62718			G	G	G	G	G	G	G	--
scaffold_63	C	2978			C	C	C	C		C	C	--
scaffold_63	G	11189				A				A	A	--
scaffold_63	C	11233				T	T	T		T	T	--
scaffold_63	A	11407				C	C			C	C	--
scaffold_63	T	13133				A		A		A	A	--
scaffold_63	T	16190				A	A			A	A	--
scaffold_63	C	43101	C			T	T				T	C
scaffold_63	G	46479	A		G	G	G				G	A
scaffold_63	T	48811	C	T					T	T	T	C
scaffold_63	C	56079							T		T	--
scaffold_63	A	110467			A		A			A	A	--
scaffold_63	A	138918			A			A	A	A	A	--
scaffold_63	T	142686			C	C		C	C	C	C	--
scaffold_63	T	156826			C	C			C	C	C	--
scaffold_63	A	167948			A			A	A	A	A	--
scaffold_63	A	170413			G			G	G	G	G	--
scaffold_63	A	171149			T				T	T	T	--
scaffold_64	T	4005	T							C	C	T
scaffold_64	A	4115	G							A	A	G
scaffold_64	C	4488			C					C	C	--
scaffold_64	G	4892	G		A						A	G
scaffold_64	C	6748	T		C					C	C	T
scaffold_64	C	6824	A							C	C	A
scaffold_64	A	7342	A		T					T	T	A
scaffold_64	A	7366	A		T					T	T	A
scaffold_64	C	8127	T		C				C	C	C	T
scaffold_64	G	8235	A		G					G	G	A
scaffold_64	C	8259	T		C					C	C	T
scaffold_64	G	8773			G					G	G	--
scaffold_64	T	9636	C		T					T	T	C
scaffold_64	A	9978	G		A					A	A	G
scaffold_64	C	10129	C		T					T	T	C
scaffold_64	G	10174	G		T					T	T	G
scaffold_64	A	10683	G		A					A	A	G
scaffold_64	C	10751	T		C					C	C	T
scaffold_64	T	10943	C		T				T	T	T	C
scaffold_64	A	11149	G		A				A	A	A	G
scaffold_64	C	11181	T		C				C	C	C	T
scaffold_64	T	11452	C		T				T	T	T	C
scaffold_64	A	11783	C		A					A	A	C
scaffold_64	T	12658	C		T				T	T	T	C
scaffold_64	A	12918	G		A					A	A	G
scaffold_64	A	13998	A		G				G	G	G	A
scaffold_64	C	14927	C		A				A	A	A	C
scaffold_64	T	15053	T		C				C	C	C	T
scaffold_65	A	1004		G	A		A		A		A	G
scaffold_68	C	3071	T	T	C	C					C	T
scaffold_68	A	3097	G	G	A	A					A	G
scaffold_68	A	3859	A	A	G	G					G	A
scaffold_68	A	9740	A	A	G	G					G	A
scaffold_68	C	16105	C	C	T	T		T	T		T	C
scaffold_68	T	18988	T	T	C	C		C	C		C	T
scaffold_68	T	19340	T	T	G	G	G	G	G		G	T
scaffold_68	T	21915	C	C	T	T	T	T	T		T	C
scaffold_68	T	26023	T	T	C	C		C	C		C	T
scaffold_68	A	26105	A	A	C		C	C	C		C	A
scaffold_68	G	26197	G	G	T	T		T	T		T	G
scaffold_68	A	29072	A	A	G			G	G		G	A
scaffold_68	C	31949	T	T	C		C	C	C		C	T
scaffold_68	T	34398	G	G	T		T	T	T	T	T	G
scaffold_68	T	36838	C	C	T		T	T	T		T	C
scaffold_68	A	38474	T	T	A		A	A	A	A	A	T
scaffold_68	C	39352		A	C		C	C	C	C	C	A
scaffold_68	T	39593	A	A	T		T	T			T	A
scaffold_68	T	53516		C	T		T		T		T	C
scaffold_68	A	54165		A	T		T		T		T	A
scaffold_68	A	58481		G	A		A		A		A	G
scaffold_68	C	63476		T	C	C			C		C	T
scaffold_68	G	63594		G	A		A		A		A	G
scaffold_68	C	63658		C	T	T	T		T		T	C
scaffold_68	A	63694	A	A	C	C			C		C	A
scaffold_68	C	63820		C	T		T				T	C
scaffold_68	T	63918		C	T						T	C
scaffold_68	C	64271		T	C		C		C		C	T
scaffold_68	T	65102		A	A						A	--
scaffold_68	C	65180		C	T						T	C
scaffold_68	A	65409		A	C		C		C		C	A
scaffold_68	A	65590		A	G		G		G		G	A
scaffold_68	T	78307		C		T	T		T		T	C
scaffold_68	C	78395		T		C	C		C		C	T
scaffold_68	A	80509		T		A	A				A	T
scaffold_69	C	35000		T	C	C			C	C	C	T
scaffold_69	C	50141			A			A			A	--
scaffold_69	T	50648			C			C			C	--
scaffold_69	G	52532			A						A	--
scaffold_69	C	52634			T						T	--
scaffold_69	G	52788			A						A	--
scaffold_69	A	52807			G						G	--
scaffold_69	T	62464			A			A			A	--
scaffold_69	G	65633			A						A	--
scaffold_69	C	69917			T			T			T	--
scaffold_69	T	70034			A			A			A	--
scaffold_70	T	25235			T					T	T	--
scaffold_70	C	26110	T		C			C		C	C	T
scaffold_70	T	26138			T			T		T	T	--
scaffold_70	C	26298			C			C		C	C	--
scaffold_70	T	26649	C		T			T		T	T	C
scaffold_70	C	26658	T		C			C		C	C	T
scaffold_70	A	27359	T		A			A		A	A	T
scaffold_70	A	28019			A			A		A	A	--
scaffold_70	T	28433	T		A			A		A	A	T
scaffold_70	C	28798	C		T			T		T	T	C
scaffold_70	T	28803	T		G			G		G	G	T
scaffold_70	C	28947			G			G		G	G	--
scaffold_70	T	39458			C			C		C	C	--
scaffold_70	A	46385			G			G		G	G	--
scaffold_70	A	53161			A	A		A		A	A	--
scaffold_70	A	54555			T	T		T		T	T	--
scaffold_70	T	54875			C			C		C	C	--
scaffold_70	A	55902			A	A		A		A	A	--
scaffold_70	A	60256	G		A	A		A		A	A	G
scaffold_70	T	61498			C			C		C	C	--
scaffold_70	A	63190			G	G		G		G	G	--
scaffold_70	C	63333			T	T		T		T	T	--
scaffold_70	G	65408			A	A		A		A	A	--
scaffold_70	A	65426								G	G	--
scaffold_70	C	65855			T	T		T		T	T	--
scaffold_70	C	66170	C		T			T		T	T	C
scaffold_70	T	71628			A	A		A	A	A	A	--
scaffold_70	C	82419		T	C		C		C		C	T
scaffold_70	T	95463			T	T			T	T	T	--
scaffold_70	G	95563	A		G	G			G	G	G	A
scaffold_70	A	96394	T		A	A			A	A	A	T
scaffold_70	A	96467	G		A	A			A	A	A	G
scaffold_70	T	96798	T		C	C			C	C	C	T
scaffold_70	C	97551	T		C	C			C	C	C	T
scaffold_70	C	97711			T	T			T	T	T	--
scaffold_70	G	97934			G	G			G	G	G	--
scaffold_70	C	98003			C	C			C	C	C	--
scaffold_70	T	98345			T	T			T	T	T	--
scaffold_70	T	98594			T	T			T	T	T	--
scaffold_70	C	98600			C	C			C	C	C	--
scaffold_70	C	98872	C		T	T			T	T	T	C
scaffold_70	G	99404	A		G	G			G	G	G	A
scaffold_70	A	99619	G		A	A			A	A	A	G
scaffold_70	G	99787	A		G	G			G	G	G	A
scaffold_70	G	99943	A		G	G			G	G	G	A
scaffold_70	A	100401	G		A	A			A	A	A	G
scaffold_70	A	101214			G	G			G	G	G	--
scaffold_70	C	101269			A	A			A	A	A	--
scaffold_70	T	102927	T		A	A			A	A	A	T
scaffold_70	T	103794	C		T	T			T	T	T	C
scaffold_70	A	103840			A	A			A	A	A	--
scaffold_70	A	103987	A		T	T			T	T	T	A
scaffold_70	C	104461			A	A			A	A	A	--
scaffold_70	C	105069			C	C			C	C	C	--
scaffold_70	T	105375			C				C	C	C	--
scaffold_70	T	105650			T	T			T	T	T	--
scaffold_70	C	105801			T	T			T	T	T	--
scaffold_70	G	105852			A	A			A	A	A	--
scaffold_70	C	105917			C	C			C	C	C	--
scaffold_70	A	106214	A		G				G	G	G	A
scaffold_70	G	106484			A	A			A	A	A	--
scaffold_70	G	106673	G		A	A			A	A	A	G
scaffold_70	A	106686	A		G	G			G	G	G	A
scaffold_70	G	106923			T	T			T	T	T	--
scaffold_70	G	106940			T	T			T	T	T	--
scaffold_70	T	106951	T		C	C			C	C	C	T
scaffold_70	A	107060			T	T			T	T	T	--
scaffold_70	A	107072			G	G			G	G	G	--
scaffold_70	T	107147	T		A	A			A	A	A	T
scaffold_70	T	107155	T		C	C			C	C	C	T
scaffold_70	T	107162	T		A	A			A	A	A	T
scaffold_70	T	107462	A		T	T			T	T	T	A
scaffold_72	G	14507		G	A		A			A	A	G
scaffold_72	T	14948		A	T					T	T	A
scaffold_72	A	18541		A	G		G		G	G	G	A
scaffold_72	T	19967		C	T		T		T	T	T	C
scaffold_72	T	20024		T	C		C		C	C	C	T
scaffold_72	T	24384		T	C				C	C	C	T
scaffold_72	C	24459		C	T				T	T	T	C
scaffold_72	G	24502		G	T				T	T	T	G
scaffold_72	T	24555		T	C					C	C	T
scaffold_72	T	24938		T	C					C	C	T
scaffold_72	T	24970		T	A						A	T
scaffold_72	C	24978		C	T						T	C
scaffold_72	T	24999		T	A					A	A	T
scaffold_72	C	25037		C	A					A	A	C
scaffold_72	T	25078		T	C				C	C	C	T
scaffold_72	T	25125		C	T				T	T	T	C
scaffold_72	C	26119		C	T					T	T	C
scaffold_72	A	26198		A	T					T	T	A
scaffold_72	T	26349		T	C					C	C	T
scaffold_72	C	28622		T	C				C	C	C	T
scaffold_72	C	30501		C	T					T	T	C
scaffold_72	C	31315		C	T				T	T	T	C
scaffold_72	A	31333		A	T				T	T	T	A
scaffold_72	A	31345		A	T				T	T	T	A
scaffold_72	G	31409		G	A				A	A	A	G
scaffold_72	T	31481		T						C	C	T
scaffold_72	A	32037		G	A				A	A	A	G
scaffold_72	G	32146		A	G				G	G	G	A
scaffold_72	A	32153		G	A				A	A	A	G
scaffold_72	T	32318		T	A				A	A	A	T
scaffold_72	A	32461		G	A					A	A	G
scaffold_72	G	32679		A	G				G	G	G	A
scaffold_72	A	32722		T	A				A	A	A	T
scaffold_72	G	32804		A	G				G	G	G	A
scaffold_72	C	33158		T	C					C	C	T
scaffold_72	T	43817	C	C		T					T	C
scaffold_72	A	43895	A	A		C		C			C	A
scaffold_72	T	43959	T	T		A		A			A	T
scaffold_72	A	44016	A	A		G		G			G	A
scaffold_72	A	44192	G	G		A		A			A	G
scaffold_72	T	44386	T	T		C		C			C	T
scaffold_72	T	44522	T	T		C		C			C	T
scaffold_72	T	44600	T	T		C		C			C	T
scaffold_72	A	45580	G	G		A		A			A	G
scaffold_72	C	45610	T	T		C		C			C	T
scaffold_72	A	45722	A	A		T		T			T	A
scaffold_72	A	45764	A	A		T		T			T	A
scaffold_72	G	46675	G	G		A		A			A	G
scaffold_72	G	47253	T	T		G		G			G	T
scaffold_72	C	47426	C	C		G		G			G	C
scaffold_72	T	65955	T	T	G	G		G			G	T
scaffold_72	G	66598	A	A	G	G					G	A
scaffold_72	T	68909	C	C	T	T					T	C
scaffold_72	T	74337	A	A	T	T					T	A
scaffold_72	A	74380	G	G	A	A					A	G
scaffold_72	T	74477		A	T	T					T	A
scaffold_72	A	74519		T	A	A					A	T
scaffold_72	A	75559		G	A	A					A	G
scaffold_72	T	76077	C	C	T	T	T		T		T	C
scaffold_72	A	86145		A	C	C	C		C		C	A
scaffold_72	A	92371	A	A	G		G		G		G	A
scaffold_72	C	101408	T	T	C		C		C		C	T
scaffold_72	G	112686		A	G		G		G		G	A
scaffold_72	A	116456		G	A	A	A		A	A	A	G
scaffold_72	G	116741		G	A	A	A			A	A	G
scaffold_72	A	116921		G	A		A		A	A	A	G
scaffold_72	G	117296		T	G		G	G			G	T
scaffold_72	A	117655		A	G	G	G				G	A
scaffold_72	A	117760		A	G	G	G		G		G	A
scaffold_72	C	117949		T	C		C		C		C	T
scaffold_72	G	118016		G	A		A		A		A	G
scaffold_72	C	118315		T	C	C	C		C		C	T
scaffold_72	T	118741		C	T	T	T				T	C
scaffold_72	C	120153		T	C	C	C				C	T
scaffold_72	C	124127		T	C	C	C				C	T
scaffold_72	T	150888			T						T	--
scaffold_72	G	164548		C	G	G			G		G	C
scaffold_72	A	169229		A	T				T	T	T	A
scaffold_73	C	8036		T	C		C			C	C	T
scaffold_73	C	12117		T	C		C				C	T
scaffold_73	C	15903		T	C	C	C			C	C	T
scaffold_73	T	23805		T	C	C	C			C	C	T
scaffold_73	T	28183		T	C	C	C		C	C	C	T
scaffold_73	T	49670			T		T		T	T	T	--
scaffold_73	A	56411		A	T		T		T		T	A
scaffold_73	C	64873		C						A	A	C
scaffold_76	C	6361			A				A		A	--
scaffold_76	T	8841			G				G		G	--
scaffold_76	T	33692			A		A			A	A	--
scaffold_76	A	58469			C		C		C	C	C	--
scaffold_76	T	61547			T		T		T	T	T	--
scaffold_76	C	65426		C	T		T	T	T	T	T	C
scaffold_76	C	89445				T	T			C	T	C
scaffold_76	C	173354		T	C		C		C	C	C	T
scaffold_76	T	173465		C	T		T		T	T	T	C
scaffold_76	T	173619		T	A				A	A	A	T
scaffold_76	C	173693		C	T				T		T	C
scaffold_76	G	173811		G	T				T	T	T	G
scaffold_76	T	174736		A					T	T	T	A
scaffold_76	T	175756		T	A				A	A	A	T
scaffold_76	T	175784		T	C				C	C	C	T
scaffold_76	A	179318		C	A				A	A	A	C
scaffold_76	T	179352		C	T		T		T	T	T	C
scaffold_76	T	179360		C	T				T	T	T	C
scaffold_76	G	181384		C	G				G	G	G	C
scaffold_77	T	10625		T		C	C			C	C	T
scaffold_77	T	17330		T		A	A			A	A	T
scaffold_77	C	17858		C		A	A				A	C
scaffold_77	G	18326		A		G	G			G	G	A
scaffold_77	T	18416		T		A	A			A	A	T
scaffold_77	A	19544		A		T	T	T		T	T	A
scaffold_77	T	25094		T			A			A	A	T
scaffold_77	G	25637		A		G	G			G	G	A
scaffold_77	T	26732		T		C	C	C		C	C	T
scaffold_77	G	39340		G			A	A		A	A	G
scaffold_77	A	39842	G	G			A	A		A	A	G
scaffold_77	G	40365		A			G	G		G	G	A
scaffold_77	T	44526		T			A	A		A	A	T
scaffold_77	C	45581	C	C			T	T		T	T	C
scaffold_77	T	53201		G	T		T	T		T	T	G
scaffold_77	C	54383		T	C			C		C	C	T
scaffold_77	C	57615		C	A		A	A		A	A	C
scaffold_77	C	77671	T	T	C	C	C		C	C	C	T
scaffold_77	C	78209		T					C	C	C	T
scaffold_77	C	78241		T		C			C	C	C	T
scaffold_77	T	82336							T		T	--
scaffold_77	T	98936		C	T	T			T		T	C
scaffold_78	C	42863			T	T		T	T		T	--
scaffold_78	C	42914			G	G		G	G		G	--
scaffold_78	T	44263			G	G	G		G		G	--
scaffold_78	C	44347			T	T	T	T	T		T	--
scaffold_78	G	44362			A	A	A	A	A		A	--
scaffold_78	G	44975			A	A	A	A	A		A	--
scaffold_78	C	45108			A	A	A	A	A		A	--
scaffold_78	A	47322			C	C					C	--
scaffold_78	A	69532	G		A	A	A				A	G
scaffold_78	A	75378	G		A	A	A				A	G
scaffold_78	C	89307	A		C		C		C	C	C	A
scaffold_78	A	90061	G		A		A		A	A	A	G
scaffold_78	T	95381	T		C	C	C		C	C	C	T
scaffold_78	C	95765	C		T	T	T		T	T	T	C
scaffold_78	A	108219			A	A	A		A	A	A	--
scaffold_78	T	112325			T	T	T		T	T	T	--
scaffold_78	A	112373			A		A				A	--
scaffold_80	T	15615		C							--	C
scaffold_80	T	15632		A							--	A
scaffold_80	T	15639		C							--	C
scaffold_80	T	15656	C	C							--	C
scaffold_80	G	15672		A							--	A
scaffold_81	T	99085					C				C	--
scaffold_82	T	1046			C	C				C	C	--
scaffold_82	C	1966			C		C				C	--
scaffold_82	A	2114				T	T			T	T	--
scaffold_82	G	5963			A	A				A	A	--
scaffold_82	G	5998			A	A				A	A	--
scaffold_82	G	6027			T	T				T	T	--
scaffold_82	T	7463			C	C				C	C	--
scaffold_82	T	7620			A	A	A			A	A	--
scaffold_82	C	8226			T	T				T	T	--
scaffold_82	A	8787			G	G				G	G	--
scaffold_82	T	8973			C	C					C	--
scaffold_82	T	9046			C	C				C	C	--
scaffold_82	C	9112			T	T				T	T	--
scaffold_82	A	9123			T	T				T	T	--
scaffold_82	C	9283			T	T				T	T	--
scaffold_82	A	9338			T	T				T	T	--
scaffold_82	G	9612			A	A				A	A	--
scaffold_82	T	9643			C	C				C	C	--
scaffold_82	A	9677			G	G				G	G	--
scaffold_82	G	54113					A		A	A	A	--
scaffold_82	G	61096					C		C	C	C	--
scaffold_82	T	67175		G					T	T	T	G
scaffold_82	T	76525		G		T				T	T	G
scaffold_82	C	77356		T						C	C	T
scaffold_82	T	87854		T						C	C	T
scaffold_82	C	89488		C						T	T	C
scaffold_82	A	89667		A		G				G	G	A
scaffold_82	T	90719		T						A	A	T
scaffold_82	A	91310		G		A			A	A	A	G
scaffold_82	T	91355		C						T	T	C
scaffold_82	A	91373		G						A	A	G
[truncated: 11,567 more rows]
